# Supplementary material for: Mitotyping – An integrative framework to quantify mitochondrial specialization and plasticity
Source: bioRxiv preprint, doi:10.1101/2025.02.03.635951, version 5 (2026-01-18)
Supplement: supplemental file 2 [file 635951_file05.xlsx]

## Sheet: Fig5B+C+D
Pathway	PC1	PC2	PC3	PC4	PC5	PC6	PC7	PC8	PC9	PC10	PC11	PC12	PC13	PC14	PC15	PC16	PC17	PC18	PC19	PC20	PC21	PC22	PC23	PC24	PC25	PC26	PC27	PC28	PC29	PC30	PC31	PC32	PC33	PC34	PC35	PC36	PC37	PC38	PC39	PC40	PC41	PC42	PC43	PC44	PC45	PC46	PC47	PC48	PC49
ABC transporters	-0.120159	-0.00598559	0.0604704	-0.0481429	0.015278489953945814	0.038807	-0.030926	0.019592633054079572	-0.152422	-0.0519518	0.12988595077482487	0.050283	-0.112846	-0.109292	-0.0210231	-0.0154438	-0.0948694	-0.0719292	-0.153027	0.0341459	-0.039438	0.10752082113259383	-0.232444	-0.0258716	-0.146089	-0.088703	-0.0444789	0.0777749	0.03294	-0.0428529	-0.141076	-0.0273766	-0.190108	-0.0573617	-0.121538	-0.0507029	0.00865583	0.14818	-0.110635	0.0831158	0.0772797	0.030945303965429206	-0.0622052	0.0508491	0.062188	0.023979936337343948	0.0981986	0.21478149047681905	0.0586807
Amidoxime reducing complex	-0.0559245	-0.0324331	0.1290813065837826	0.021858391168046738	0.12472705033335034	-0.137627	0.018156	0.0898844	-0.0905972	0.15476949980771823	0.0348864	-0.00604649	-0.0720287	-0.183061	-0.0802494	0.027728220601173876	-0.127706	0.053075216762210116	0.12022007813885355	-0.111425	0.0310861	0.0717889	-0.135592	-0.01764	-0.0196668	0.010088236231345204	-0.0698809	0.14666231193819468	0.000493815	0.17501243766074948	-0.00726862	-0.0589589	-0.0725719	0.2570262757228944	0.094686	-0.040794	0.014713969334691417	0.018189448329545287	0.0419537	-0.00720215	-0.0268577	-0.0448081	-0.0075876	0.1147368068237777	-0.0805921	0.3266588209579337	0.00601179	-0.0340521	0.046159
Amino acid metabolism	0.018617447576893743	-0.134339	-0.0197567	-0.178008	-0.0046781	-0.0224212	0.012825440869076185	-0.0850173	0.0288364	0.0308329	0.0593795	0.00574507	-0.107116	-0.0930062	-0.032895	-0.0335403	0.012890879467754612	0.048506	-0.0675884	0.0277569	0.024767	-0.0871919	0.00720826	-0.0272244	0.024268051988140832	-0.0401809	0.062208035265193584	-0.0315282	-0.0101378	0.010505808507698777	0.017681667434094724	0.0461045	-0.0466939	-0.00330199	0.025702740091351574	0.0431474	0.015723613196420395	-0.0643176	0.022122679138094754	-0.0221097	-0.00450409	-0.0049251	0.00518187	-0.0671523	0.0070154	-0.0388325	0.020358333750139127	-0.0541926	-0.0288941
Apoptosis	0.00768408	0.1039664900117931	-0.00364653	-0.0862168	-0.0849285	0.16097148342646941	0.0704535	0.1251487514883302	-0.199025	0.00662795	0.019605132693397805	0.12592394686451328	-0.135185	0.12695796594452183	-0.0467117	-0.104473	0.0456694	-0.0880967	-0.0019759	0.051197332722206085	-0.000643558	0.056991864367041976	-0.0257592	-0.0433089	0.0471398	-0.0679624	0.0697279	-0.0612723	0.014545764409093812	0.0312958	0.066856	-0.0460538	0.0343139	-0.127851	-0.0412113	0.0538656	-0.0282738	-0.03858	0.038025	-0.044748	-0.0424464	-0.0396949	-0.00575219	-0.00671026	-0.129004	-0.106108	0.1018257387184752	0.0778356	-0.0980153
Autophagy	0.00947504	0.15088645380414373	-0.0591308	-0.0417438	-0.00910068	-0.031018	0.070488	-0.0982079	-0.0862157	-0.00671184	0.11430392605713334	-0.118306	0.0238529	-0.0233037	-0.0582801	0.1945051628124949	0.0350276	0.12425483530791476	-0.0493207	-0.0429823	-0.00161331	0.0537345	0.0480463	0.059119170890034024	0.14342399397019187	-0.0248841	0.035692360982535726	0.1034865995983205	0.013829264074740487	-0.0733451	0.031265900387449384	0.019988056200135773	0.013175914545732529	0.0940502	-0.0193583	0.0461355	-0.0604516	-0.105783	-0.0762574	0.022136537981713073	-0.0793178	0.025268007018831716	-0.0257022	0.057502019451588914	0.035026949079285094	0.0975882	0.0735445	-0.0166179	0.018132841879050815
Biotin utilizing proteins	0.0182064	-0.0304094	0.049247	-0.0692957	0.0431583	-0.254476	-0.0162259	0.029262424447919853	-0.18702	-0.148979	-0.214224	-0.0131378	0.13192812759655181	0.040961872342654616	-0.0835153	0.0294073	-0.148936	0.037942809675749485	-0.173783	-0.0499943	-0.0505147	-0.10078	-0.0594695	0.0399058	0.012381246822303788	0.0767416	-0.0277217	-0.105628	0.011788875917709619	-0.0384531	-0.0978775	-0.075217	0.0869437	0.029021604329415016	-0.110253	0.030506084224219868	0.094414	-0.023253	-0.149586	-0.0867943	0.14131152934792057	0.0621228	-0.0900725	0.0745505	0.00704331	-0.0999856	-0.0125352	-0.0333086	-0.0862049
Branched-chain amino acid dehydrogenase complex	-0.0920925	-0.0889081	-0.089777	0.046554	0.043628862352641636	-0.0280757	0.0748922	-0.0167499	1.8301886230922035e-4	0.13953590587480838	-0.053069	0.0671448	-0.109109	-0.0673875	0.0359177	-0.0733949	9.391211000410375e-4	-0.0524788	0.1279821321092961	-0.222205	-0.10975	-0.0665715	0.0308753	0.10087841476686334	-0.00473794	0.025234526964773216	-0.110609	-0.141269	-0.0729283	0.021471850839464336	0.051960321444849765	0.060579	-0.0240148	0.0828671	-0.0571617	-0.0294997	-0.189853	-0.0554561	-0.200176	0.10050070430721832	-0.0258977	0.0980466	-0.19297	0.0200201	-0.0345448	-0.125549	0.076978	-0.0581017	-0.0080004
Branched-chain amino acid metabolism	-0.0153955	-0.161761	-0.0356277	-0.105489	0.053986401533640656	-0.047103	0.0436628	-0.0435923	0.0068813	0.0562668	2.2239310306590177e-4	0.030042731630507497	-0.0550876	-0.0285584	0.033242635816416705	-0.0181963	0.022337565143904413	0.0556577	-0.0802099	-0.00749955	-0.0252325	-0.0433041	0.0398263	-0.018661	0.060696	0.0498354	0.0184356	-0.0308783	-0.0249411	0.025866917310021227	0.00532209	0.0463074	-0.0100314	0.1049857506693032	0.051136867061282086	0.020569135363802008	-0.0389851	0.021851636950397144	0.0891625	-0.0857964	-0.0441843	-0.0735958	-0.0853287	0.010436188486397808	-0.0204364	-0.0294589	0.13238318991717632	0.027750296948315843	-0.0303281
CI assembly factors	0.020790755916089892	0.12818515776238168	-0.105554	-0.0699538	0.12462814622656787	0.049535	-0.108645	0.014255278595871439	0.0641269	-0.0229418	-0.0540161	-0.0151441	-0.00930732	-0.0588475	0.0153872	0.0690193	0.031697631423769995	0.0373826	-0.0109547	-0.120972	0.0330825	-0.0112907	-0.0646135	-0.0569824	0.00985223	-0.0185837	-0.0402596	0.0550531	-0.119202	-0.144016	-0.0448746	0.0427513	-0.0458216	0.0940618	0.0562886	-0.0436593	0.062186488352467345	-0.0394914	0.0912013	-0.0230046	-0.015051	-8.54897e-05	-0.00470518	-0.00839937	-0.0155122	0.013744210126530732	0.0971527	-0.0635832	0.076522
CI subunits	0.14305317349040117	0.0440296	-0.0478332	-0.0393605	0.0029364	0.0622448	0.0318034	0.010145649903209689	0.00260775	0.017903786854386265	-0.0389588	0.030607579809428413	0.0218477	-0.0437619	-0.0214417	0.010645760127081131	-0.0218797	-0.0160934	0.00723944	-0.00420288	-0.0486057	0.0203877	-0.0029651	0.0156739	-0.0210894	-0.0436063	-0.0373734	-0.000635894	0.036600597789296765	0.0337376	-0.0318468	-0.0526702	-0.0255781	0.0565022	-0.0396992	-0.00517947	-0.00678099	0.052031751193545674	-0.0531355	-0.00465262	0.029107556275980575	-0.0916582	0.00718211	-0.00133515	0.010944386277054232	-0.0874325	-0.0140148	-0.031593	0.028961476335012785
CII assembly factors	-0.108229	0.0830487	0.0187791	-0.0824708	-0.0822797	-0.0386823	-0.0001368	-0.0435244	0.0324339	-0.0755204	-0.0103331	0.13116433180407383	0.011589888045054012	-0.0366258	-0.0861307	-0.0156864	-0.0301914	0.12368521113506142	-0.0887846	0.13035655292572287	0.0358924	0.11844772099103211	-0.07468	0.0808214	0.025570642609649842	0.0917615	-0.0504036	-0.0280904	-0.273834	-0.0576083	0.037501455119211595	-0.0669822	-0.055885	-0.150845	-0.126041	-0.149414	-0.0840153	0.022578577985659893	-0.00124394	-0.190561	0.035452513410271294	-0.0578513	-0.0482736	0.11533980984256757	0.14264880513447814	-0.109634	-0.0669576	-0.0581296	0.13133075233123137
CII subunits	-0.0677882	-0.123682	-0.117579	-0.00369317	-0.065619	-0.0219436	-0.02937	0.058101978046378566	0.00474954	0.0975471	0.00392667	0.00670228	0.018007275230271128	-0.0653909	-0.055772	0.0346369	0.019694392258759567	0.00590114	-0.0651278	0.0217937	0.0306499	-0.138629	0.023321019060027284	0.00910633	-0.14205	-0.00949536	0.0961369	-0.0100111	-0.00394937	0.0749755	0.0475143	0.0434762	-0.0730938	-0.00265059	0.041756035344299135	-0.013639	-0.0928101	-0.0302505	0.10941877168244182	-0.0557051	0.0604901	-0.0836371	0.0609416	0.0452711	0.037103621942533804	0.048371363209211767	-0.0679493	-0.0788253	0.00969272
CIII assembly factors	0.00702653	0.0995751	-0.137303	0.019662582537625622	0.0684032	-0.0202053	-0.0566927	-0.0689078	0.0391718	-0.170359	0.1389135006794044	0.0903646	-0.103637	0.0939042	-0.0546597	0.00218701	-0.231334	-0.0488739	0.062659	-0.0127326	0.042895113844073525	-0.167217	8.712518003011697e-4	0.020513581701383208	0.0271842	0.0372509	-0.073498	-0.0622522	0.012125687035818896	-0.0426348	0.0351722	0.1524134153261321	-0.203798	0.084657	0.11662368483884018	-0.104229	0.00983197	0.022661776389930176	-0.0460379	0.0904601	-0.0653821	-0.0653008	0.13115982535760048	0.11937820506597858	0.0688201	-0.0406488	-0.0439574	0.0796891	-0.0853039
CIII subunits	0.14138662834753982	0.00295857	-0.0724315	-0.0220206	0.023008	0.047203647906184545	0.0479012	-0.0128561	0.0090842	-0.00482656	-0.047027	0.0858839	-0.00321008	-0.0888125	-0.0358192	0.00897279	-0.0556446	-0.0658088	-0.029383	0.019726979194279102	-0.0278315	0.0385503	0.0580245	0.054009342069689506	0.015077359260336327	-0.0193468	0.00988462	-0.0213409	-0.00629702	0.019778877646254477	0.0327015	0.0164672	-0.0199191	0.0361199	-0.0767524	-0.041395	0.0605232	-0.00267587	-0.0229815	-0.058134	-0.0286242	-0.0135338	0.0354909	9.395153325816759e-6	-0.0589113	0.0714878	0.0338959	-0.0440882	-0.0265609
CIV assembly factors	0.014276058238678275	0.0785625	-0.088023	-0.0771194	-0.186087	-0.128576	-0.072144	0.0810797	0.030627367501593315	-0.189182	-0.0514966	0.0943297	0.028315708090127664	0.0586629	0.0441086	-0.0140306	0.040005238264881636	0.0751635	0.012032033805060436	-0.0527829	0.0806212	0.027703086138698107	-0.0815713	0.0316584	-0.0439289	-0.0943673	0.029909747320168417	-0.0437731	0.0537536	0.15689419204165012	-0.0497854	0.028378188039464864	0.060920569544904914	-0.00860357	0.11652572198543684	-0.116049	-0.113228	-0.000794549	-0.0897808	0.081507	-0.01975	0.0490998	0.055518	-0.0747294	-0.0361712	0.0891621	0.062367049442554966	-0.215166	-0.046655
CIV subunits	0.13957997749786247	0.0437733	-0.0616468	-0.0437929	-0.0238628	0.0649542	0.025274691762735186	0.029927824507274887	0.00765295	0.0340247	-0.0359143	0.013059955560527112	0.0355933	-0.0439678	0.00469533	0.00701267	0.0204843	-0.0232437	0.00475665	0.00117016	-0.0471628	0.021824867962758898	0.010018837933123288	-0.0148689	0.0428315	-0.00636934	-0.0119895	-0.00262309	0.056005194316458014	0.0703234	-0.0625171	-0.0100292	-0.0525779	0.0559498	-0.0339097	0.00473937	0.024251556311787974	0.056659418158334765	0.0221667	-0.0348639	0.0599964	-0.00458229	-0.0282666	0.026672640531058264	0.0986887	0.0358664	-0.0300797	0.015013993484649253	-0.0369321
CV assembly factors	0.052048	0.0390152	-0.191391	-0.0156052	-0.0220456	-0.0712891	0.0222752	0.073556	-0.00102299	-0.00956289	-0.0382818	0.012043130906831886	-0.147795	0.0269795	0.0655424	-0.00712732	0.0176977	0.20474812707186582	0.0471902	-0.0322959	-0.123803	0.030857324746445088	-0.0154835	-0.0899847	0.010066138105000982	0.0588724	-0.193519	-0.0859587	0.00241653	-0.0934459	0.11539468429594979	-0.161054	-0.0719162	-0.0359018	0.027079801110955443	-0.00374963	-0.021745	-0.0603795	0.019891647273765835	0.19095101566872097	-0.0119378	0.0614578	0.00327045	-0.107549	0.11886064176651309	-0.00438049	-0.159098	0.16054505972248073	-0.0159375
CV subunits	0.13746173679653378	0.00300693	-0.0598936	-0.0161351	0.058323	0.0775114	0.0617154	-0.0104118	0.00863659	-0.0185626	-0.0557886	0.10503953453870941	0.00859731	-0.0801493	-0.0325204	0.014380781840680801	-0.0467763	0.0263367	-0.0220407	0.034593	-0.0705026	-0.00377792	0.028932476055002113	0.038055	-0.110188	-0.117008	-0.0662109	-0.0580152	0.0769913	-7.21018e-05	0.047269013125480173	-0.0491151	-0.0728232	0.034448885461972056	-0.00655054	0.0746038	-0.130375	-0.0408085	-0.126065	-0.00415085	0.056307418002419354	0.027518638524982295	0.012884573600782443	-0.0945026	-0.0831332	0.00411646	0.024848296530517476	0.00378423	-0.0200382
Calcium cycle	-0.114512	-0.055652	-0.0822684	0.10009280410999281	-0.0378783	-0.0366778	0.11839482251681739	0.026018203448856178	-0.00959647	0.028399796232750057	0.00209307	-0.0139736	0.00716529	-0.0420436	-0.0777908	0.010913032967142704	-0.00391159	-0.0178756	0.0166421	-0.0837219	-0.027842	-0.0327256	0.051451642811117075	-0.0387031	-0.159437	0.00172702	0.0350094	-0.0355351	0.0982842	-0.119725	0.0550631	0.0233912	-0.104784	0.063402	0.0650378	0.0342085	0.1586282324307533	-0.0729112	-0.00336891	-0.0121898	0.13713825443405675	-0.00171855	-0.0950329	-0.0872056	-0.00888462	0.0780636	0.0391221	0.0640728	-0.0118487
Calcium homeostasis	-0.0982889	-0.0268959	-0.0593011	0.0794755	-0.154443	0.13015330093387015	0.11538823328422326	-0.0354999	-0.0351903	-0.0603156	-0.0373459	-0.108204	-0.0766617	0.016022082640130993	-0.0498806	-0.0240078	-0.0795893	-0.0116648	-0.00133505	-0.0427102	-0.0693932	-0.105737	-0.0321307	-0.0394655	-0.043211	0.010857544004767537	-0.0335641	-0.0136708	0.0805286	-0.108213	-0.0246833	-0.00990483	0.087406	0.0669512	-0.00368144	0.0101312	-0.0279374	0.12547341878951698	0.048711394799419834	-0.13571	-0.0663374	0.00625025	-0.0123226	-0.0659587	0.0249807	-0.0584179	0.00289483	0.016302267343763815	-0.0439108
Calcium uniporter	-0.101914	0.037690242392887686	-0.0337145	-0.051427	-0.143056	-0.0299315	-0.0180083	0.050827378159701904	-0.010023	0.0743433	0.13243116438638944	0.0965083	-0.214984	0.011014285942182117	-0.0776341	-0.0260201	-0.0399897	-0.0846907	-0.280709	0.0990246	0.021788897812927085	0.021018692778836147	0.0951665	0.025089902597213696	-0.0432356	-0.0381456	-0.0405727	-0.018668	-0.013756	-0.144713	0.080349	-0.0653225	0.010482564418064192	0.20331150864120198	0.0358448	-0.25157	0.11625010425650839	0.0650421	0.054792772544990494	0.3463646722717054	0.14112226647641876	0.033424	-0.0669023	0.0272072	-0.107255	0.042249625984005876	0.0312365	-0.045431	0.10693517916002437
Carbohydrate metabolism	-0.025335	-0.14214	-0.138837	-0.0345117	0.019344595424060834	-0.0300938	-0.0041355	-0.0102851	-0.0628826	0.0236682	0.027123782546803327	-0.0424439	0.046130554310593944	0.0229758	-0.0332228	0.0269205	-0.00728963	-0.0185136	-0.0284795	0.0049186	-0.00077007	0.0314769	-0.0179148	-0.039256	0.00429975	-0.0491995	0.0692711	-0.0382151	0.012321324810253853	0.020647729408290568	-0.0346105	-0.00832775	0.0850222	0.027296488662680474	-0.0203003	-0.0354831	0.0323824	0.0556606	-0.0759587	0.018298795452048145	-0.128783	0.0201934	-0.00808611	0.027152782876351707	0.00614633	0.0363903	-0.0575551	-0.0106915	-0.0238376
Cardiolipin synthesis	-0.0892671	-0.000496394	0.0726673	-0.0381704	0.12924730242995167	0.0695374	0.0641776	-0.0353182	-0.213917	-0.0429284	-0.18878	-0.0177001	0.00847591	0.0419726	-0.117895	0.0944943	-0.0202531	-0.00707758	0.1624116554208626	-0.0363187	0.0387438	-0.062374	0.029465569708512124	0.0808208	-0.0559141	0.19796566421399855	-0.0246888	-0.0385021	0.1570932068449454	0.0718891	0.020013415693096216	-0.0747394	-0.168186	-0.111856	-0.0708245	-0.123594	0.0996721	-0.0255807	0.1000841537305276	0.0736878	-0.130141	-0.152716	-0.000690907	-0.0141008	-0.043334	0.077204	0.17832450270732095	-0.0336181	0.0910946
Carnitine shuttle	-0.0512912	-0.0962482	-0.0874473	-0.00765107	0.025108397938360335	0.1364994632098834	-0.2006	0.0744943	0.031836266130530026	-0.0826377	0.062166359818958156	0.0484031	-0.0754282	0.019763945505057896	-0.117861	0.14281543014377754	0.0660476	-0.030694	0.174749	0.017394489976773096	0.00163912	0.10943348064714566	0.025552098546080215	0.030721080219916416	0.10098400136739125	0.00789302	-0.035972	0.0637251	-0.0777449	-0.0483468	0.10193985248581072	0.0523421	-0.121593	-0.0694735	-0.0580904	0.023396868102208215	0.0790433	0.024491286688752657	-0.0529265	0.00150115	0.16899229220367473	0.059919278433486024	0.052696670244458246	3.0414731858622934e-4	-0.0467534	-0.0133805	-0.00332475	-0.0331983	-0.165126
Carnitine synthesis and transport	-0.0587528	-0.0974785	-0.090817	-0.00239578	0.011671577140203972	0.11447232442574508	-0.195655	0.0719295	0.0215141	-0.0748733	0.0705509	0.044112447760172736	-0.0887703	0.012204241341612222	-0.123999	0.13595885505071803	0.0643135	-0.0369343	0.17211145088952923	0.010046267763702899	-0.0153004	0.0922704	0.0221292	0.012455239283045455	0.095602	0.010884855788699816	-0.0465798	0.046772	-0.0845238	-0.0480079	0.11299319839958041	0.0659087	-0.136388	-0.0837194	-0.0690235	0.063741	0.0412051	0.0323209	-0.0566794	0.00715573	0.1480628312351058	0.043334992910922125	0.0296737	0.0669217	-0.0311816	-0.00967823	-0.03753	-0.0677585	-0.152034
Catechol metabolism	0.036058754955345884	-0.0439704	0.1385154301511348	-0.00869166	0.0108376	-0.0340295	-0.0126763	-0.0362529	-0.0913978	0.043682252853089756	0.2005319872503679	-0.205672	0.0602379	-0.288688	-0.0433625	-0.00601538	-0.028494	-0.077212	0.15965880442866104	-0.141865	0.0280907	-0.112558	-0.0617909	-0.289071	0.054524	-0.198794	0.12332022428894876	-0.18572	0.0057148	0.0334026	0.1935204960052027	-0.19602	0.012039388871176449	-0.00330055	0.047726711887746506	-0.149805	0.11069047078418012	0.1572153882557116	-0.0619204	-0.0466527	0.0889592	0.083668	0.15242317325680477	-0.000436266	0.2073374955753037	-0.169639	-0.00393219	-0.130572	-0.0401593
Chaperones	-0.0310759	0.061548060437357985	0.0586187	-0.121729	-0.0117962	-0.0366561	0.2391239877066421	0.13061417313683765	0.16321410442044487	0.0919187	-0.026289	-0.0876634	0.0463139	-0.0383094	-0.0250374	0.1701286541753949	0.00650777	-0.0237611	0.031818681153115834	-0.0256799	0.0703178	-0.041696	0.16330921570288326	-0.112918	-0.10962	-0.00548091	-0.165004	0.2509406437019983	-0.0747194	-0.0319468	-0.0307682	-0.0926125	-0.0637212	-0.0207032	0.079854	-0.0238922	-0.0105447	0.11596784969038722	0.00722442	0.0781388	-0.0595151	-0.206112	-0.032567	-0.0710647	0.044303885963525726	-0.117889	0.0325799	0.1063742670316151	-0.0534904
Cholesterol, bile acid, steroid synthesis	-0.0166554	-0.0220278	0.0503675	-0.00649787	0.10688997257911595	-0.0221743	0.25162793457515964	0.2875272222501661	0.15647443630180097	-0.0823164	0.0472582	-0.0840346	-0.046716	0.0291965	0.0122052	-0.0407401	-0.0174982	-0.0403254	-0.00972627	0.0252425	-0.0996622	-0.0563387	-0.12543	0.03588	0.0653647	0.0509062	0.019486129157862932	0.00533482	-0.0763712	0.00174728	-0.0708339	-0.0374893	-0.116109	0.10576633546466328	-0.0307891	-0.0196248	0.0245005	-0.0660943	-0.0554664	0.0716503	-0.0361928	0.0819178	-0.0263936	-0.0742849	-0.0454987	-0.00914533	-0.149571	-0.130813	-0.0885318
Cholesterol-associated	-0.0854042	-0.0177851	0.0510093	-0.135898	-0.054896	0.094529	0.079993	0.13459142285666956	-0.0452035	-0.0769487	0.0320473	-0.000394059	0.1127397513149411	0.0992846	-0.033233	-0.113728	-0.173491	0.00331555	0.11604676584512309	0.0819358	-0.17605	-0.0300158	0.17894053655681846	0.035055	-0.0579161	0.0688187	0.21350484183130802	0.2346513822192941	0.013118972652464735	0.00969406	0.13486269649882435	0.31471342595236557	0.0803685	0.12625433062000818	0.17607243664449773	-0.0232286	-0.0251844	0.21902493321947614	-0.191754	-0.0404176	0.1270900259236517	0.13861603064193004	0.030005021829903493	0.0980806	0.0734734	0.00881013	-0.00290349	0.042382628147031476	0.1274369465615607
Choline and betaine metabolism	0.00558412	-0.154056	-0.0550099	-0.132424	0.010666545221950612	0.026631508585200553	0.0299469	-0.0131826	-0.00194832	0.024891141587711482	0.00469275	-0.00874793	0.00566831	-0.00593684	-0.0307853	-0.0510969	-0.0440711	0.00212498	-0.0163294	-0.0354826	-0.0359385	-0.0610464	0.06433	-0.124258	0.14865353664208933	0.0979839	-0.116072	0.0790849	-0.110481	-0.0872528	-0.0244842	-0.142372	0.058477130195133904	-0.121233	-0.0488314	0.022131477140901686	-0.111749	0.00366229	0.010523071328947196	-0.0282748	-0.023667	0.142989	-0.0168748	0.0836881	0.038974	0.0838579	0.10797918342250926	-0.0695044	0.12803282990997325
Coenzyme A metabolism	-0.0975196	-0.0168728	0.030323996514324547	-0.0488118	0.0765961	0.10832443246785638	0.0640984	-0.175343	0.0473908	-0.0308409	0.00910011	0.0321398	0.1259258572915722	-0.00482826	0.13817196197209597	-0.320005	0.0773835	0.037086	0.14313281984387946	0.0403731	-0.0997264	-0.18142	-0.00680193	-0.00450226	0.20995640986488479	-0.066569	0.011228860395301254	-0.00767251	-0.046887	0.0864882	0.1058209024541358	-0.0263194	-0.0738184	0.0933936	-0.114835	0.1271986701514072	-0.00502761	0.047387003659226816	0.12358640355102038	0.0843291	0.0860667	-0.019484	-0.217216	-0.023459	-0.054608	0.10002244389159955	0.00134821	0.122035	0.040793784191875626
Coenzyme Q metabolism	-0.0458734	-0.057593	-0.154878	0.0958773	0.0687044	-0.0224611	0.087318	-0.00854426	-0.0678115	-0.00419545	0.0483972	-0.182109	0.058091546713247295	0.10258367652111033	-0.0183817	-0.0164512	0.0842297	0.0783179	-0.0786248	0.1500955672224602	0.20792529146592648	0.11528791685031149	-0.0261313	-0.0154773	-0.0753673	0.0465218	-0.128956	-0.0985807	-0.0747004	-0.0906834	0.0587816	-0.0774168	-0.149009	0.0330099	0.0530073	0.015127114299365566	-0.0434266	0.0338131	-0.148673	-0.107713	0.00400133	-0.0355	0.028422923712181875	0.00831402	-0.0282367	0.0872827	0.10774749804010215	-0.148615	-0.0824577
Complex I	0.14301627649244283	0.0441294	-0.047908	-0.0394249	0.00301864	0.0622765	0.031709579330175194	0.010158789057478194	0.00265968	0.0178938	-0.0389937	0.0305912	0.021830234464874785	-0.043817	-0.0214261	0.010694856820227918	-0.0218495	-0.0160569	0.00722039	-0.00430277	-0.0485592	0.020368397303798275	-0.00302249	0.015609138176030025	-0.0210778	-0.0436085	-0.0374044	-0.000595614	0.036497	0.0336162	-0.0318698	-0.0526246	-0.0256288	0.0565809	-0.0396672	-0.00517482	-0.00675141	0.0520145	-0.0530894	-0.00468797	0.029104004191334486	-0.0916303	0.00718419	-0.0013278	0.010927113979518272	-0.0873693	-0.0139701	-0.031645	0.0290486
Complex II	-0.0824319	-0.110753	-0.114108	-0.015425	-0.0764662	-0.0271388	-0.0289085	0.0511955	0.00907517	0.0856491	0.00253593	0.025365995704222485	0.019546696805865477	-0.0699529	-0.067614	0.0320811	0.015382493210462565	0.023267770398422392	-0.0772618	0.0403687	0.035657504008617745	-0.120213	0.0126032	0.020623802967460067	-0.136801	0.00389946	0.0880659	-0.0137889	-0.0432686	0.0657761	0.052297353784694973	0.0331131	-0.0802533	-0.0242779	0.0235878	-0.034761	-0.103724	-0.0264982	0.10810152240236831	-0.082208	0.0644533	-0.0909951	0.0534849	0.0613245	0.0572928	0.0325522	-0.0769918	-0.0862082	0.02812
Complex III	0.14130807512706284	0.00326246	-0.0727961	-0.0219949	0.023168002539124575	0.0471404	0.0477143	-0.0130401	0.00919927	-0.00528683	-0.0466125	0.0861185	-0.00352137	-0.0885282	-0.0359628	0.00896703	-0.0562839	-0.0659104	-0.029214	0.0196722	-0.0276957	0.0380272	0.0579742	0.0540027	0.015139228909754028	-0.019244	0.00967055	-0.0215301	-0.00625164	0.0196485	0.032759523059345944	0.016878204538203063	-0.0205483	0.036363734609025464	-0.0763928	-0.0415851	0.0604868	-0.00254951	-0.0231503	-0.0578678	-0.0287878	-0.0136583	0.0358337	3.8943038119704373e-4	-0.0586942	0.0714102	0.033680583142405414	-0.0438313	-0.0267516
Complex IV	0.13953294271209593	0.0438905	-0.0617481	-0.0439179	-0.024135	0.064767	0.025176837658305272	0.0300253	0.00769337	0.0337784	-0.0359798	0.01319	0.0356169	-0.0439129	0.00472206	0.00698853	0.020517575775313556	-0.0231217	0.00475788	0.00108307	-0.0470054	0.021839795119205873	0.00989414	-0.0148347	0.0427427	-0.00651754	-0.011991	-0.00266894	0.056032196749792124	0.0705197	-0.0625708	-0.0100315	-0.0525352	0.05595	-0.0337669	0.00466342	0.024052353956888064	0.0567032	0.021936254649513275	-0.03481	0.0599869	-0.00450604	-0.028158	0.026603057292641077	0.0985739	0.0360871	-0.030006	0.014760520963659242	-0.0368975
Complex V	0.1374537713931557	0.00303029	-0.0599832	-0.016148	0.0582896	0.0774566	0.061712999032965794	-0.0103674	0.00863491	-0.0185585	-0.0557992	0.10502491595896703	0.00851513	-0.080125	-0.0324785	0.014370563862152644	-0.0467592	0.0264357	-0.0220128	0.0345667	-0.0705547	-0.00375546	0.028912037992650838	0.0379905	-0.11016	-0.116951	-0.0663034	-0.0580493	0.0769741	-0.000115631	0.0473303	-0.0491868	-0.0728474	0.034430426719824395	-0.00654872	0.0745971	-0.130361	-0.0408268	-0.126034	-0.00405603	0.056287	0.0275388	0.012881497070687264	-0.0945379	-0.0830538	0.00411539	0.024756348413605307	0.00384171	-0.0200379
Copper metabolism	-0.100803	-0.0494241	-0.111389	0.0924898	-0.0673226	-0.0637266	0.0934389	0.0489327	-0.0124646	-0.0314798	-0.0333995	-0.00151176	-0.00624584	-0.0256503	-0.0242229	-0.0114022	0.0326948	0.13841260559981744	0.14771991050231673	-0.0645992	-0.0781806	0.029048426588688357	0.0877837	-0.0139589	-0.191944	-0.0124245	0.0652227	-0.107434	0.12660933318722883	-0.0277686	-0.0355692	0.0341526	0.015408682565460307	2.931896524112519e-4	0.0273573	0.0997372	0.0319272	-0.115265	-0.0106474	-0.058011	0.1888655896985213	0.055282431768350376	-0.094235	-0.0407724	-0.0210902	0.019283648984920874	0.0374487	-0.0366879	-0.0891853
Creatine metabolism	0.022915406379405107	-0.0855942	-0.0504225	-0.0373445	0.0152805	0.053153186243114284	0.0896944	-0.225566	0.0659632	-0.0902337	-0.210282	-0.135732	-0.187402	0.1842206191590379	0.00933302	0.0998484	0.0550068	-0.216905	0.0417116	-0.094356	0.0849906	0.0672138	-0.0584279	-0.0547407	-0.0639326	0.058692460548729515	4.891195129854671e-4	0.18452227033172822	-0.0508319	0.1414192047813913	0.0805051	-0.0129028	-0.0706332	-0.113182	0.0376095	0.0513838	0.011968358568402348	-0.0552585	-0.0342881	0.1062853204135664	0.0633424	0.0255063	0.0901229	-0.000570521	0.0716024	0.0537846	-0.0394166	-0.0981221	0.0717339
Cristae formation	0.0794832	0.061415486052322256	-0.159736	-0.0177221	-0.107812	0.026166507353143586	0.026098813479189926	0.045060160591358214	-0.0449518	-0.0132092	-0.0301827	0.026193514955897973	0.0723289	-0.022706	0.039558344519915176	0.0250176	-0.0122989	0.10625013843867992	9.739072387439347e-4	-0.082924	-0.0560628	-0.0763169	-0.104899	-0.15683	-0.0180261	0.0672061	-0.0117123	0.0509212	0.0354073	0.019290724710425856	-0.12597	0.0570735	0.013369687736849177	-0.161398	0.077826	-0.00207922	0.11579257516053706	0.00687297	-0.00931391	0.0887297	0.015198952597625073	0.1337428156269496	-0.0577678	-0.113007	-0.106005	-0.0391394	-0.122954	-0.0756987	0.14801909069120298
Cytochrome C	-0.0357313	-0.0601179	-0.162749	0.0899924	-0.0924324	0.0130825	-0.0384777	0.12015034265653841	-0.0312178	0.0456201	0.0724505	0.0966851	-0.05185	0.0830658	0.0978567	0.10976885750544177	-0.125428	-0.0809538	0.050446364992545775	-0.0545977	0.032082681439758266	-0.128105	0.022894736807457253	0.14082023099608892	0.0752657	-0.00705459	-0.0375851	0.0701611	0.0376075	-0.00859896	-0.134108	-0.0303422	0.12931753160785894	-0.11496	0.0270872	0.10027622190080852	0.1541872184399507	-0.0782091	0.00209068	-0.0520694	0.026356588924992336	-0.15813	0.021310340554528663	0.0430487	-0.0180718	-0.0268665	-0.168883	-0.042631	-0.018614
Cytochromes	0.14243338687600368	0.00337302	-0.0672028	-0.0225659	0.0258967	0.0459678	0.0463974	-0.0129882	0.012497707528951815	-0.0027473	-0.0483169	0.0855138	-0.004114	-0.0879421	-0.0353873	0.00898941	-0.0533139	-0.0678222	-0.0282259	0.020629771936043022	-0.0268267	0.0412811	0.057652	0.0549695	0.0169253	-0.016796	0.011420645218584623	-0.0178869	-0.00685917	0.020669728989271077	0.029243348389659553	0.0160127	-0.0211069	0.040746492114778696	-0.0787073	-0.0432335	0.0665081	5.993306866386696e-4	-0.0227954	-0.0614252	-0.0240142	-0.0102351	0.0359997	0.00304118	-0.059694	0.071513	0.0317967	-0.050599	-0.0277789
Detoxification	-0.020553	-0.0670781	0.0718345	-0.177121	0.11372698851119137	0.030674517826654393	0.040999136799246085	0.11031547868686974	-0.212257	-0.0377766	-0.00508629	-0.0482872	-0.0408365	0.014587333730503329	0.0973595	-0.0221778	-0.0408228	0.0471658	-0.0569913	-0.0183554	0.0882882	0.12178873991647145	-0.0217997	-0.00878432	-0.0843182	-0.0749756	-0.0979936	-0.0815751	-0.0663877	0.0971109	0.00778849	0.10316979372052032	-0.0186958	0.0539402	0.0097122	0.12849544365980875	0.059310172143323056	-0.0665409	0.1127043521325509	-0.0859195	0.0067058	-0.0431685	0.061024065424686955	-0.000281736	0.023242562346156955	-0.0407866	-0.127836	0.0302811	0.0393769
EF hand proteins	0.10135895277863768	0.09343	0.036128137756237876	-0.0408263	-0.0354066	-0.0201002	-0.00438082	-0.0874324	-0.0504825	0.0407079	0.1669130714693471	-0.00424784	-0.147926	0.0575656	-0.0738717	0.011241980294421637	0.0304498	-0.0353787	-0.0295458	0.0263045	-0.0592452	-0.125473	-0.0186932	-0.0638377	-0.163313	0.23611838042098104	-0.0797644	0.15604482478196283	-0.0920356	-0.0280206	0.046587313148239225	0.07608	0.0322198	0.0840155	-0.160493	0.0433905	-0.205881	0.37634585267166837	0.0267314	-0.179264	-0.121284	0.1618314259481663	-0.0103634	-0.262206	-0.138779	0.0150693	-0.0746271	-0.0737782	-0.0299051
Eicosanoid metabolism	0.0267046	-0.0117855	-0.0586449	0.011531921507806986	-0.0953096	-0.16236	-0.0888052	0.11184843382525443	-0.125043	-0.233139	-0.138	-0.0556254	0.15993173342064423	-0.195943	-0.195464	-0.0362866	0.020660343006298695	-0.249857	0.0587111	0.0562562	0.050207841847607335	-0.0805311	0.046385959775906045	-0.019648	-0.0984355	-0.0528378	-0.0701541	0.0878077	-0.110292	-0.0395804	0.26949206682360205	-0.146662	-0.053845	-0.0737696	0.0730193	0.00654077	0.00662748	-0.0476996	0.21469407092339934	-0.0592478	-0.0833015	0.0768482	0.00678268	-0.141112	-0.0361925	0.12776683859971827	-0.0323423	0.029198	0.1345340857505629
Electron carriers	0.14228262615537393	0.00220197	-0.0677457	-0.0233755	0.025588702354165074	0.0469989	0.046408525495580416	-0.0124959	0.012104448914893087	-0.00205389	-0.0483591	0.0859255	-0.00307454	-0.087301	-0.034891	0.00903617	-0.0539953	-0.0679583	-0.0278684	0.0205556	-0.0267596	0.040678	0.057622466380253444	0.0542842	0.018063935583478845	-0.0163702	0.010698834089312501	-0.0173673	-0.00789945	0.0204569	0.0287957	0.014843725397889508	-0.0213813	0.0412389	-0.0791553	-0.0426831	0.065563	5.541589641768849e-4	-0.0224166	-0.0610193	-0.0232614	-0.00948388	0.0354659	0.00304221	-0.0603135	0.0718383	0.0321064	-0.0505875	-0.0278528
Fatty acid oxidation	-0.0115577	-0.158939	-0.0484601	-0.101433	0.0826245	-0.013548	0.017628841326211623	-0.0132039	-0.0950101	-0.00838872	-0.0192737	-0.00587693	-0.0115806	0.026409180439315547	-0.0482231	0.024627094622678373	-0.0078874	0.034237699193250454	-0.0853645	0.0838489	-0.00586906	-0.0101202	0.0444914	-0.0337715	0.045208073550829744	0.032927	0.024044891850072404	0.00962694	0.019669	-0.0145159	0.011247995618027163	0.00162394	-0.00147497	0.013593989292905926	0.030897553315441466	0.025967952670886012	0.0633479	0.0295609	0.028988184114257787	-0.0180402	-0.0681179	0.0674018	-0.026168	0.0906964	-0.0209107	0.00457797	0.1216419345318235	0.00485425	-0.13063
Fe-S cluster biosynthesis	-0.053455	0.036767922148171574	-0.0964702	0.00607138	0.0849506	-0.0705169	0.1952740421759017	0.2160845447818781	0.00665799	-0.0916866	0.0350474	0.0414983	-0.180885	-0.162489	0.0350806	-0.00259439	0.15661759036358927	0.036217337152651116	0.0547138	0.094732	-0.0468932	0.09737	-0.0684976	-0.0170002	-0.0127208	0.0622962	0.12025279241549529	-0.000955756	-0.0069095	-0.0186331	0.0660345	0.0902983	0.15084159794815746	-0.00809465	-0.169362	0.031310754731807854	-0.0194849	0.029792472579408293	0.047575693498252865	0.033593	-0.0530327	0.0388513	0.0559877	-0.0584456	0.20771811645764612	0.0368076	0.00516479	-0.0618945	0.2149321879993717
Fe-S-containing proteins	0.00810223	-0.0327918	-0.210985	0.026090757192113314	0.0404591	0.028603228230844362	0.10070056376077903	0.0859226	-0.0609325	-0.0393529	0.023946440751545447	-0.0570636	-0.0644408	-0.0429268	0.0026141	0.012459300539410837	0.13002453692401797	0.0733075	0.00352453	0.11266388293720134	0.0745352	0.0986185	0.00676739	-0.00557747	-0.0383359	0.0635605	0.1106239191351948	-0.045915	0.0503398	-0.00231747	-0.037632	0.017694481848109653	0.035613729795874675	0.010577296412659821	-0.0277681	-0.074462	-0.0325105	0.021731080458565737	0.019292477151603628	0.0353593	0.014474521389039026	0.0414576	0.0526679	0.0770296	0.0638247	0.0447535	-0.0553092	0.0884945	0.0953707
Fission	-0.0628336	0.12494773497211689	-0.00185827	-0.0154142	0.15331857880233773	2.920486575019564e-4	-0.0886865	-0.0898855	-0.0276656	-0.0868687	0.045483918610526794	0.0641668	-0.128309	0.0497054	0.059070180893214315	-0.017077	0.052067	-0.0102153	-0.017013	-0.00917518	-0.0687092	0.059946602831044755	-0.0560709	-0.0169641	-0.0170845	0.15680614321977246	0.23599257055902245	0.0340423	0.0944442	-0.0314715	0.0160075	-0.0250086	-0.0255323	-0.0176553	-0.0957355	0.012375621512898874	0.0555213	-0.071215	0.0695207	-0.126291	0.0832344	0.00988136	-0.0640509	-0.0762908	-0.100858	-0.0546724	0.16537269953380454	-0.274077	0.099679
Folate and 1-C metabolism	0.10088128445711482	0.055795342439089866	0.020066468010486248	-0.179011	-0.0562051	0.032034237435640274	0.0333165	-0.0539834	0.00897853	0.0499136	0.012410460052983881	-0.0384006	-0.0308095	0.052186	-0.0131011	0.022462090231136256	0.0343569	0.038571988344940626	0.0364593	-0.0639376	0.0208841	-0.0621957	-0.0442472	-0.011723	-0.116421	0.16628698022005597	0.1181713091752762	-0.133128	-0.051511	-0.206477	0.0853081	-0.0782161	0.0917608	-0.043706	-0.00592237	0.0639818	-0.00454273	0.012307487474544349	-0.0435488	0.0254904	0.0837349	-0.120785	0.0835461	0.0560814	-0.0601552	0.2248966785083735	-0.0153073	0.0933484	-0.103476
Fusion	-0.00418949	0.0723412	-0.0857418	0.0834153	0.1533390884862236	0.0334615	-0.11098	-0.0546279	-0.128086	0.1341558977639216	0.15383395891611196	-0.0317374	-0.0407548	-0.177442	0.00174611	-0.06739	-0.0196705	-0.170778	0.0955708	-0.0923749	0.0710322	-0.0737685	-0.183753	0.060624518850375606	-0.179482	0.18488992098064033	0.19050971473687364	0.15106470182203463	-0.039276	0.11036422807985355	-0.151183	-0.0822066	0.0837743	0.09172	0.0450346	-0.0366241	-0.159386	-0.174372	0.0797714	-0.0458264	0.0639533	0.0745772	0.0169113	0.022940227377459824	-0.0630145	-0.00462074	0.069697	0.19281590072977278	-0.147697
GABA metabolism	0.0932467	-0.00115579	0.0422867	-0.200051	-0.0149061	7.739001186673877e-4	-0.00830804	-0.100786	0.0770724	-0.029316	0.095216	-0.0209135	-0.0237949	0.0807692	0.022336551066442147	-0.0638296	-0.0174881	0.11930483930761422	-0.0311244	-0.0200201	0.00284454	-0.102262	-0.0815702	0.00592035	0.016983169677414544	0.053439664863226856	0.0366387	0.0653253	-0.0189412	0.0643467	0.10766098918417172	0.047742983589415484	-0.141206	-0.0945374	0.15455265623731548	-0.0649595	0.13093795403610808	-0.13649	-0.0589365	-0.139761	-0.0405121	0.057431161899557506	-0.0419388	-0.0295504	0.15981423588538707	0.0946987	-0.140543	0.25878353862296427	-0.0934615
Gluconeogenesis	0.012681912551864198	-0.119889	-0.125813	-0.0442058	0.12759135880461145	0.12430385964491994	-0.0503543	-0.0220335	-0.0257628	-0.0576063	0.00548588	0.00228522	0.033988766780281246	-0.074547	-0.0156648	-0.0350214	-0.00326912	0.0357751	-0.0145502	-0.0929941	-0.0500231	-0.0272572	0.032430069664294944	0.079987	0.0360832	0.0621592	0.0758761	0.0368202	-0.0785565	-0.0800638	-0.0197954	-0.0337996	0.0454305	0.0118778	0.0860135	-0.0741213	0.038023807828399515	-0.0527934	0.013651227293911845	0.10565153478219128	-0.146968	-0.00110337	-0.057975	-0.0520169	0.0410522	0.010821347974983965	-0.0858922	0.00254735	-0.0146583
Glutamate metabolism	0.0912458	-0.0320723	-0.0917418	-0.126625	-0.0343185	-0.0118935	0.046238481134665166	-0.132188	0.0320887	0.00734458	0.0767801	-0.0697341	-0.0646289	0.24120327375798642	-0.0597776	-0.06713	-0.13465	0.019862783592535602	-0.0116804	0.0014726	0.0889992	-0.04416	0.022827165423375012	-0.00650124	0.00753786	0.037919935884265156	0.050474802900003495	-0.0189304	-0.00785986	0.24953881172619694	-0.0207076	-0.0789088	-0.0249327	0.10504216306560271	9.729650948531138e-4	-0.0908546	0.1215004319779336	-0.134957	-0.182988	-0.00993354	0.1096574541625073	0.057311	-0.028001	-0.251262	0.11027000893271449	-0.122688	0.0655004	-0.0656695	0.15478064505647074
Glycerol phosphate shuttle	-0.0135666	0.0651242	0.0557444	0.06862	-0.156265	0.10644779369176417	-0.056546	0.0346289	-0.140446	0.0768604	0.12502805915774232	-0.0228465	0.12468947251829449	0.0978771	0.24010663994185863	-0.0942964	0.15464421791046407	0.0550119	-0.0749217	-0.0473124	-0.240349	-0.120281	0.133563	0.13280570064279507	-0.227191	-0.154401	-0.082761	0.061533	-0.4114	0.10156722248323476	-0.0177111	-0.0832391	0.0472513	-0.0469609	-0.13252	-0.156497	0.12029348451322218	-0.100017	-0.0405786	0.041759586047521044	-0.0596108	0.010998893851751507	0.13768873618308017	3.4275454132638727e-4	0.0779228	0.19188967175302354	0.0653053	-0.105973	-0.0855802
Glycine cleavage system	0.035621163590130255	-0.0905435	-0.11355	-0.0874592	-0.0589559	-0.149179	-0.00591797	0.028131131203267993	-0.0476575	0.0918048	-0.037527	0.0735589	-0.0321225	-0.0665513	0.1147508141715948	-0.132014	0.206828	-0.0901797	0.10844542249382799	0.030431427500060143	0.12055367137542665	-0.16382	-0.0315135	0.10868428481730608	-0.0249466	0.00579609	-0.162278	0.1521963952717435	0.20628259567878046	-0.0372242	0.010734557666160905	0.1487306823580194	-0.0631337	-0.0298706	-0.129145	-0.135349	-0.0198837	-0.107203	3.0019209248715575e-4	0.0371756	0.0835034	-0.0704724	-0.0950436	0.00405505	0.0974609	-0.0161773	0.0801998	0.0338401	-0.0898492
Glycine metabolism	2.690857565722151e-4	-0.138618	-0.0425016	-0.173404	-0.00738843	-0.00689614	0.0481845	-0.0668639	0.00838776	0.0373851	-0.0365731	0.0458503	-0.0699137	0.00871034	0.0383855	-0.0452024	0.0422042	-0.0466484	-0.0601143	0.029914886114401316	0.0378977	-0.0774543	0.0729442	-0.0621495	0.0641439	0.0543787	-0.0295662	0.0483617	0.00640017	-0.0052475	0.031891	-0.0018675	0.021212632167313464	-0.0149446	-0.0517898	0.00145201	-0.032977	-0.046144	0.047315621344935936	-0.0227348	-0.00493932	0.1024986427989148	-0.0372283	0.022706508974583133	0.0784398	0.0105411	0.13031634963231695	0.011909042855016169	0.00944988
Glyoxylate metabolism	0.025733	-0.0607116	-0.0858315	-0.178531	-0.00879101	-0.0554638	0.0897821	-0.0717872	0.0398357	0.14243689804699194	-0.0013845	0.19113663746616538	-0.174853	-0.113891	-0.0533613	-0.0132395	-0.0932982	-0.0120582	-0.156271	-0.0820713	0.0135641	-0.0453131	0.032349	-0.0402886	-0.0449309	-0.128231	0.0869178	-0.0541421	-0.0136432	-0.0146997	0.10961	0.0382328	0.0919991	-0.125691	-0.0178507	0.018706276294576597	0.0658054	-0.0734197	0.14288949598371564	-0.0238331	-0.07258	0.0530353	0.0685879	-0.0984076	-0.0787589	-0.0690821	-0.0284277	0.029309699752613702	-0.095619
Heme synthesis and processing	-0.00936744	-0.120262	0.037436259453437405	-0.0791429	-0.0779	0.11733265505961571	-0.0897036	0.11333727369376627	0.0261656	-0.0885058	0.13868819473723407	-0.00347148	0.11577806955385501	0.012474406431702082	0.0513503	0.2913360182182918	0.012587029353882577	-0.0814899	0.060447466423772286	0.11040365519635838	-0.0155209	-0.0372545	-0.145018	-0.0229218	-0.0738665	-0.0520523	-0.00544525	0.0377993	0.17620318296018841	-0.0111147	-0.0215159	-0.0686002	0.029492741117459073	-0.114205	-0.106372	-0.139615	-0.0418054	-0.0359083	-0.0340675	-0.0184032	0.00437345	0.0695491	-0.066648	0.00293432	-0.0770351	-0.0320938	0.046143033377176276	0.00722607	0.10520946654465024
Heme-containing proteins	0.13932113080459832	0.0432245	-0.0654745	-0.040655	-0.0252503	0.0614041	0.0264977	0.0306218	0.00184921	0.033795391010254805	-0.0253416	4.105162743416185e-4	0.037969259756855125	-0.0386565	-0.0206722	-0.00174336	0.00960658	-0.023382	0.0364609	-0.0203352	-0.0506837	0.035850446974481316	-0.00678987	0.00228621	0.025864837231309987	-0.0111805	-0.0254351	-0.0322012	0.0438	0.049597731138871275	-0.0684812	-0.0242781	-0.0731972	0.032481093366427384	-0.0529545	0.026933817433790246	0.013288011437512997	0.0808804	0.0392424	-0.0812185	0.040830686747397864	0.018029535662555916	-0.0334848	0.0648788	0.10561180232826144	0.1276647225562876	-0.0208615	-0.00504692	0.0390213
Immune response	-0.0494155	0.015033580400590314	0.0753496	0.0485945	0.0103049	0.0926582	2.5073716790589807e-4	0.10841989852503812	-0.105743	0.13515572401178658	-0.0688333	0.2681034880363539	0.0709011	0.18873425867655166	-0.309069	-0.10664	0.2320146738027429	-0.0271048	-0.0645181	-0.0877247	-0.0479309	0.10550036263598965	-0.0649102	-0.257762	0.16028564548866164	-0.118798	0.13861190559397948	0.15879483976499895	-0.015776	-0.0494004	0.0424441	-0.0294567	-0.139425	0.051395586842530726	-0.0155528	-0.0838401	-0.00565325	-0.0808364	-0.0561079	0.030696554499948847	0.025407133815556596	-0.0952286	-0.032289	0.0421238	0.0697993	0.0186328	-0.0541056	0.0183708	-0.0617092
Import motor	-0.0506778	0.036690566305395564	-0.0481862	0.00839	0.19732728371710492	0.025492980686570087	0.19358099506245222	-0.0571296	-0.0123136	-0.187243	0.0726064	0.0727697	0.0731322	-0.0134917	-0.0329545	-0.0569811	0.0699328	0.0879478	-0.0114091	-0.133197	0.2455233375044873	-0.22178	0.15137181517613935	-0.161583	-0.123554	-0.127197	0.012699176464511273	0.0852494	-0.0251204	0.095449	-0.000565286	0.12916001109159184	0.0892684	-0.0994019	-0.219933	-0.144369	-0.13289	0.0284007	-0.0219223	0.0612406	0.20255738495420808	-0.146916	-0.156651	0.12901174049551303	-0.104595	0.040057189697903464	-0.237839	-0.0681367	-0.0020001
Intramitochondrial membrane interactions	-0.121377	0.010824212782345305	-0.113927	0.040967	0.0486569	-0.00735417	-0.0938391	0.0344021	-0.035693	0.029399274976632757	0.0239944	-0.0790319	-0.0570622	0.070469	0.0614623	-0.0101057	0.012255836762177228	0.034217902568340224	-0.0715376	0.0701756	-0.0492485	-0.0794356	0.0851674	-0.0749617	-0.109119	-0.0184738	0.00328133	-0.0226398	0.0965662	0.0511562	0.00414481	-0.0636287	-0.103334	0.045200229312519116	-0.0211439	0.0737308	0.052262696220399016	0.0890564	-0.132365	-0.0227228	-0.0987192	-0.0184446	-0.0872501	0.00648659	0.021814088414318356	0.14240801418924562	-0.0166657	-0.122051	-0.0880241
Iron homeostasis	0.057520934000335706	0.0865681	0.0850674	-0.0218609	-0.0441312	0.0686261	0.0891403	0.0633598	-0.242541	0.00909402	-0.0168601	0.087849	-0.0840651	0.0833808	-0.0476433	0.0406359	-0.0312268	-0.0855473	0.0844895	0.036910371174262914	0.16910643235552567	-0.159508	0.10571654446254318	-0.0481271	-0.0782325	-0.18538	0.20188655369095834	-0.0662121	-0.191743	-0.0701378	-0.30684	-0.0155585	-0.138045	-0.0266693	0.22098226815357405	0.22494029254063336	-0.008315	-0.0290364	0.0352582	0.1531388851649078	-0.0410073	0.0912931	-0.0473347	-0.117124	0.12423767502479843	0.093581702095893185	0.13655307534954786	-0.079219	9.224605201674022e-4
Itaconate metabolism	-0.025738	-0.142402	-0.0482233	0.0431929	-0.118551	-0.030788	-0.0981469	0.043093574252336585	0.0278861	0.0332591	-0.0832104	-0.0326678	-0.0490636	-0.0846412	0.0650579	0.1002204811919679	0.081694	0.0068568	-0.23626	0.11492604176346367	0.029700359208831472	-0.156499	0.029715529332829133	-0.0336229	0.0749683	0.0914683	0.16914372312518716	0.016724055674999076	0.039189428293722885	0.10385315077820523	-0.0176903	0.0156335	-0.0567513	0.0715469	0.0705666	0.043899347942986264	-0.029634	0.049160375344365514	-0.0478594	0.0328557	0.0291273	-0.0655018	-0.0521006	-0.0844978	0.11315277471814549	0.0795201	-0.0227322	0.064852	-0.0356233
Ketone metabolism	0.00954574	-0.154108	-0.0435327	-0.130436	0.043093048219320876	0.00236681	-0.0355204	-0.0154044	0.00925897	0.00651135	0.0949724	0.0599778	0.0537218	0.061397	0.00573382	0.10070873029087414	-0.0202551	-0.0152332	-0.0285328	-0.00581989	-0.0765813	0.011223	-0.0416824	-0.0398513	-0.0211709	-0.0609615	0.023310104434199563	0.021862656677925234	0.021147810602405174	-0.0890128	-0.0500166	0.0237732	0.061199078881622127	0.0547043	0.0378773	0.00500594	-0.0419686	-0.0428843	0.0371107	-0.0327137	-0.0877944	0.0950138	-0.011939	0.10682056950655033	0.036671949348419046	0.00153034	-0.041945	-0.118046	-0.0711051
Kynurenine metabolism	-0.0184749	-0.0737873	-0.184388	0.00707393	0.0067155	-0.112175	0.050292	-0.0541361	-0.0134064	0.0419337	0.12731641465002014	-0.0416071	0.0799486	0.12486031613383547	-0.0563393	-0.0515384	-0.0606656	-0.00132069	0.023647667617848842	0.0326324	0.0921318	0.10528792911189745	0.10203836738053673	0.0462476	0.0533399	-0.0876401	0.0657538	-0.0689354	-0.0102651	0.0246404	-0.120074	0.0931234	-0.0247451	-0.0312021	-0.0706043	-0.0249312	-0.00656296	0.10502098729987464	-0.0117633	-0.0553106	0.0423608	-0.0032141	0.2314859449223888	-0.101023	0.026996589303800705	0.0237781	0.033285573738523096	0.1871722508450578	0.012161471166033213
Lipid metabolism	-0.0154642	-0.144564	0.037337482794437396	-0.0946858	0.031396057695034674	0.024806202155452792	0.0330155	0.17135158360143718	0.031753435479980635	-0.0914317	0.0727012	-0.0319669	0.0966103	0.024083751114059963	-0.0102193	0.1557550748877445	-0.0435672	-0.0272659	0.011457892728702831	0.0789246	-0.0777477	-0.0762199	-0.110518	-0.00611291	-0.017594	0.0285627	0.0437385	0.0831735	0.0628971	0.0188535	-0.0494991	-0.0849112	-0.0378531	0.016350421218502234	-0.00750753	-0.0520721	-0.00571787	-0.0465227	-0.0610592	0.035286427877496467	0.00940763	0.13653936706606867	-0.0893702	-0.0402076	-0.0639582	-0.00323028	-0.0318365	-0.0583545	-0.00863913
Lipoate insertion	0.084268	0.0726662	-0.0197563	-0.119469	-0.02878	-0.143673	-0.0600318	-0.0366196	-0.0253752	-0.0630521	-0.0270549	-0.0580554	0.0576774	-0.0388118	0.026610640389085616	-0.114967	0.24547048303433408	-0.121285	-0.0310173	0.14210290484589397	0.11133684276889558	-0.199538	-0.139559	0.18858077232493242	0.0464637	-0.110186	-0.0462996	0.15478811505408513	0.10604757506549352	-0.182034	-0.0593478	0.0464531	-0.0813637	0.030226551756524937	-0.0185422	0.0930606	-0.0454092	0.042454801994569184	-0.0476632	0.031892515825073305	-0.0450482	0.0839552	0.1641784380100889	0.0832714	0.16781618372065882	-0.0622432	-0.00289422	-0.0641618	-0.0701345
Lysine metabolism	0.00200492	-0.16007	-0.0753532	-0.0881788	0.0379394	-0.0235482	0.00561869	-0.0119197	-0.0502799	0.0637254	0.037575802118707945	6.484305180073833e-4	-0.037674	-0.044529	-0.00276005	-0.0105131	0.030902663995996997	0.026447730803456592	-0.0441562	0.0633727	0.056558013656796614	-0.121089	-0.0712879	0.0389812	0.12544283067008283	0.0176659	-0.0274697	0.0240108	-0.0365373	-0.0696458	-0.00798486	-0.0180884	-0.0845751	0.00856326	0.013715472184969227	0.039153447265458004	0.041472884404677744	0.0291068	0.045962026566634694	-0.0567418	-0.0493187	0.00392813	-0.0170705	0.11992446244885888	-0.111645	-0.0650786	0.10933462264570556	-0.0892865	0.050787
MIA40	-0.065042	-0.0793512	-0.00701551	-0.0184084	0.0746484	0.14968177917144326	-0.126543	0.0387802	0.20891963292867582	-0.10311	-0.150142	-0.00715965	-0.0991875	-0.00590752	-0.00316621	0.12050771227623013	0.078145	0.10980096578500433	-0.0833877	-0.0437508	-0.0327969	0.00308287	0.0433469	-0.0364301	-0.264387	-0.102691	0.095548	-0.109174	-0.0128071	0.0692951	-0.0296315	0.0808966	0.026771741149923468	-0.00161865	0.048943247973401494	0.010070601952359752	-0.103401	0.0303136	0.0590667	-0.150416	-0.0287889	-0.0045375	0.024321846717881766	0.0982926	0.026605233039892574	0.019553129569800026	0.26777426609396654	0.20702852964602972	-0.0306081
MICOS complex	0.00737797	0.052850474045855696	-0.206125	0.0328045	0.0498148	0.0412502	-0.115617	0.047731226005135956	-0.00517457	0.00908794	-0.0148345	-0.05515	-0.0891556	-0.0140503	0.086456	-0.0227826	0.019366019318553487	0.058556005790823734	0.024627496688491988	-0.0402658	-0.012214	-0.0289846	-0.0269935	-0.0917337	-0.023123	-0.0330172	-0.0895893	0.032019774666887914	-0.117966	0.046371139422347725	0.0870446	-0.077028	2.273861544479175e-4	0.12176915106456279	0.00738674	0.11252172791672085	-0.0197379	0.0700064	0.1448191040647087	0.022400024887962312	0.072768	0.17393973261773085	0.0567093	0.10324858541830716	0.00856186	-0.0973749	-0.0520864	-0.0290335	-0.0379026
Malate-aspartate shuttle	-0.0129105	-0.0795259	-0.190748	0.04138	0.0465284	-0.01508	0.0793402	-0.050558	-0.0422605	0.027444239911025858	0.10422578526656345	-0.0589795	0.10124325422369003	0.081801	-0.0309997	-0.0698521	-0.023713	-0.0113105	0.0282571	0.024921	0.0797238	0.0727605	0.037789550894619175	0.020734666409715913	0.0490612	0.0542916	0.010123693080375787	-0.0506504	-0.063506	0.00727435	-0.117825	-0.0517523	-0.0326638	0.0115885	-0.0185344	-0.0126799	0.058276323796729625	0.096713	0.0389335	0.00277334	-0.0693582	0.0788535	0.0948492	0.0266231	-0.078458	-0.0186427	-0.055896	0.0793313	0.023276526410822018
Metabolism	0.13899447321413588	0.03754	-0.0642205	-0.051833	-0.0262322	0.0683859	0.032500768174295265	0.036058972799776476	-0.0107849	0.0293497	-0.0241364	1.9197840896415547e-4	0.0361838	-0.0367067	-0.0197593	0.00541535	0.0092311	-0.0274117	0.0390043	-0.0165575	-0.046498	0.032066714662929624	-0.00703153	-0.000646437	0.0208619	-0.0189197	-0.0190328	-0.033001	0.0410969	0.0509081	-0.0777661	-0.02583	-0.0767568	0.031889935867415876	-0.0477298	0.0356925	0.011421553175157704	0.0789452	0.034967784788175485	-0.0784862	0.0404433	0.0236627	-0.0342697	0.060218352275944485	0.10719097118411167	0.13616726237281188	-0.0194627	-0.00751108	0.0415995
Metals and cofactors	0.1392089891456143	0.0425789	-0.0634089	-0.043072	-0.0283249	0.066048	0.0277908	0.035299626877651355	-0.00598653	0.0313978	-0.0221155	0.00234521	0.0372936	-0.0361725	-0.0206629	0.0058933	0.010389037388932681	-0.0268195	0.0408787	-0.0160526	-0.0453245	0.0305492	-0.00620475	5.209650506137706e-4	0.020486422220422677	-0.0172954	-0.0189428	-0.0339465	0.0423643	0.046230664191629654	-0.077122	-0.026072	-0.0761333	0.0289752	-0.0480192	0.0312809	0.011895857199574162	0.0796253	0.0381433	-0.0768527	0.0409418	0.0215715	-0.0351721	0.0617928	0.10596502918362385	0.13206927574647917	-0.0154893	-0.00508547	0.0406138
Mitochondrial central dogma	-0.121842	0.0940782	-0.0577124	-0.0578534	0.033061436308122014	-0.0161421	0.00939053	-0.0344144	0.0433687	0.011389619043347692	-0.0434961	0.00860241	0.069698	-0.0266805	2.187667510296787e-4	-0.00419174	-0.0198122	-0.0260382	-0.0101881	-0.0197976	0.00208586	-0.00908575	-0.0180929	-0.0281337	-0.0026095	-0.012871	-0.0310752	-0.028965	-0.0166655	6.861910141868629e-4	-0.0232576	-0.00479268	-0.018793	0.012636121693471865	-0.00120184	-0.056317	-0.0146686	-0.0423406	-0.0553589	-0.0271098	0.0067916	0.046628634851681255	0.0469106	0.042371267947846035	-0.0140918	-0.0123866	0.0647706	0.020323026101230542	0.00183534
Mitochondrial dynamics and surveillance	0.0285319	0.1400243096954701	-0.0857643	-0.0571725	-0.0804956	0.0698742	0.0493614	0.0534846	-0.158082	-0.0246887	0.0600007	0.0248139	-0.068506	0.0632133	-0.02903	-0.0153077	0.026850589929759743	0.023611146522457483	-0.0129673	-0.0124842	-0.031471	0.00110698	-0.0327317	-0.0590138	0.0385078	-0.0147804	0.0749815	0.0232339	0.0357849	0.00243914	0.0075375	-0.0271767	0.012415417899498033	-0.0992098	-0.003232	0.068659	-0.0213757	-0.0638806	0.00188801	-0.0261213	-0.0400011	0.033405	-0.0480963	6.203951908882919e-4	-0.077348	-0.0492043	0.0656949	-0.00364477	0.015509829330473167
Mitochondrial permeability transition pore	-0.0999519	-0.0385242	-0.0414579	0.054818556850311825	-0.147916	0.16607572013355668	0.071549	-0.0171791	-0.0152971	-0.0998734	-0.0926631	-0.106331	-0.0596638	0.020729977727084112	0.00741283	-0.0405611	-0.102499	-0.000126103	-0.0193326	-0.00569875	-0.045277	-0.0578121	-0.0420442	-0.00482308	0.0898195	-0.0824581	-0.0248994	-0.0548219	0.0793771	-0.0551378	-0.0614963	-0.0545085	0.13459873289351904	0.028553	0.0359027	-0.0254881	-0.0188873	0.0330736	0.060631826795593834	-0.0521274	-0.0769701	-0.0574531	0.029227983026677982	0.073024	0.0724302	-0.106792	0.0219147	0.034893779104757126	-0.0286942
Mitochondrial ribosome	-0.110384	0.0818178	-0.0750618	-0.0310902	0.10090133456608946	-0.0049784	0.0772917	-0.0482407	0.0518079	-0.0244063	-0.0599761	0.0340942	0.1276122483561265	-0.0642561	0.00812058	0.012506156914885073	0.044549	0.0252291	-0.00241079	-0.0127279	0.036122103482610725	-0.0102221	-0.00364707	-0.0537591	-0.0441222	-0.0129545	-0.0330572	-0.0287376	-0.0567659	-0.0666797	-0.0593751	-0.0583123	-0.0166843	0.043239377750034814	0.0241235	-0.179963	-0.0202104	-0.0963777	-0.113141	-0.0669363	-0.0390946	0.0991215	0.10418060973404067	0.0649246	-0.0396555	-0.0969113	0.1352359771357887	0.0440462	-0.0126701
Mitochondrial ribosome assembly	-0.00048413	0.1495441942394529	-0.0708353	-0.0839133	0.00580304	0.00282006	-0.106937	0.0074695	0.0605579	0.0853603	0.043903849724601804	-0.119356	-0.00837943	0.0762895	-0.0324048	-0.0152867	-0.0670643	-0.0272789	-0.0204918	0.025356928689559775	-0.0450657	-0.0633905	-0.159297	-0.0651645	0.0663635	-0.138996	-0.00997796	-0.101034	-0.0126785	0.022496081898754836	0.00534537	0.0561562	-0.108216	-0.099049	0.0818158	-0.165209	-0.0949217	-0.00790375	0.03459	-0.10649	-0.00581439	-0.00738017	-0.142626	-0.10576	-0.102452	0.1134552194864076	0.012383145976373595	0.0450293	0.0560079
Mitophagy	0.021054702519125657	0.14491690147905134	-0.0609926	-0.0411941	-0.0204564	-0.0308427	0.0961161	-0.0942092	-0.0993255	-0.00466586	0.10881488177634688	-0.118399	0.035815189053414916	-0.0383298	-0.0572253	0.19872725240922706	0.038004836937638405	0.13254335609120066	-0.0499961	-0.0455816	0.012205384667918857	0.0595484	0.0532575	0.0746536	0.12182523984409596	-0.0197342	0.022294132925037704	0.0924446	-0.00200121	-0.0716738	0.019024199738145616	0.0374309	0.019490627653419867	0.11255465714363153	-0.0259039	0.021244833013289315	-0.0655704	-0.114521	-0.0580244	0.032630602503819606	-0.0664069	0.0600284	-0.0253199	0.0997134	0.0365693	0.0808176	0.060170062223305766	-0.00355654	0.0242534
Molybdenum cofactor synthesis and proteins	-0.0113613	-0.0985718	0.0788925	-0.0512661	0.020755734107237977	-0.157909	-0.070192	0.019752479084274625	-0.189676	0.0447073	-0.123159	-0.0144603	-0.117421	-0.0308879	0.00572326	-0.0484763	0.0791392	0.32261226264091253	0.0970263	0.043742145381523156	-0.137347	-0.0829177	0.0568428	0.044316546389977576	0.0970473	-0.102762	-0.0955074	0.10591986208582531	0.20091548945972237	0.00737241	0.054694	-0.0785529	0.0363104	-0.15688	0.14784698491296883	-0.103545	-0.095377	0.0789373	-0.100568	-0.0375533	0.1400768554484239	0.0886757	0.1307991635994148	-0.174662	-0.0294006	0.0718701	0.11450803260155312	0.0670725	-0.0061898
NAD biosynthesis and metabolism	-0.0431842	-0.0146461	-0.0904968	-0.161723	0.00748131	-0.172233	-0.0377156	-0.124927	-0.0184072	-0.0808683	0.13525906485555797	-0.0231585	-0.015972	0.021470320818208745	-0.0489703	-0.023386	0.1752089375239586	-0.131353	0.0956259	-0.106093	-0.127197	0.25615299359934796	0.061039069020766994	0.0876034	0.0202938	0.012831321111897543	-0.0178747	-0.0156328	0.00305488	-0.0563237	-0.235406	-0.0900434	0.13894516130663254	0.11199862608762817	0.0631544	-0.10755	0.010676408476738836	0.1288941145577001	0.18443796426633133	0.0728673	0.15587445246384485	-0.185322	-0.0929868	-0.289088	0.11705346185995974	-0.0613501	0.0534816	0.0398185	-0.0946516
Nucleotide import	-0.0893078	-0.0130732	0.0713195	0.030826935231027218	-0.148077	0.18698765303282158	0.0561679	-0.0737389	0.012333385264252691	-0.0941137	-0.116698	-0.0702237	-0.0934192	-0.082355	0.0425768	0.0373728	-0.0170419	0.039035667288874795	0.00996882	-0.0923732	-0.0903838	-0.0453299	-0.095441	-0.0511691	0.0778816	-0.0285019	-0.11967	-0.0206882	0.034579962207649785	-0.0495923	-0.094816	-0.0522349	0.10451121329789864	0.14753629310621388	0.067717	-0.0926541	-0.0628219	0.023521791068720273	0.0820057	-0.129713	-0.000619256	0.026271161954306108	-0.0238317	0.021683850091382077	0.0349624	0.10497367942338827	-0.0708003	-0.0213728	-0.0546775
Nucleotide metabolism	-0.0543487	-0.0631313	0.00879016	-0.052203	-0.0846733	0.1424988977474256	0.10923530062488279	-0.212643	0.026101680854236812	-0.109485	-0.20228	-0.0874196	-0.179627	0.038441	0.0747503	0.10929250026689859	0.045361007420776034	-0.132077	-0.0152572	-0.0697595	0.040439631858835604	0.057697	-0.0442096	-0.0788861	0.0102132	0.0606625	-0.0348307	0.15116978672358333	-0.0300108	0.1758796053971192	-0.0245536	-0.0609936	-0.032658	-0.0268834	0.0641042	-0.034891	-0.0432782	-0.0103052	-0.0178939	0.030325938103528776	0.0401234	0.040340119204787334	0.0875513	-0.000195026	3.2099576381758034e-4	0.0341412	-0.0802446	-0.067197	-0.0261466
Nucleotide synthesis and processing	-0.104555	0.025600021152237508	0.0587054	-0.0987683	-0.104034	0.0514229	0.0420333	-0.0193573	-0.0816221	0.00694458	0.025787	0.1290645074695248	0.018578698195107553	-0.202818	0.14873975645314982	0.046853710591343654	0.016644153072311253	0.060107140357697555	-0.147923	0.10898100436337896	0.0321183	0.073998	0.11447830217752639	-0.039976	0.0676859	0.0844686	0.037781084857604466	0.057684911303122414	-0.00818163	0.26957827372426185	-0.108991	-0.0932571	-0.075097	-0.031132	0.0188765	-0.0808064	-0.076739	0.0699117	-0.0685652	-0.00619646	-0.0146498	0.0392737	0.0713022	-0.0600561	-0.218704	-0.121448	-0.0590941	0.0246269	-0.151746
OXA	-0.125615	-0.0422447	-0.0692828	0.038701109743011664	-0.0420465	-0.0237396	0.1107780936831058	-0.0250055	-0.0628521	0.0656899	-0.0421964	-0.0506178	-0.0209479	0.032795	-0.0927236	-0.0445129	0.023314322918741543	0.00633624	-0.0128236	-0.16499	-0.0884102	0.0786898	-0.00555197	0.14688884087535822	0.0319608	-0.0171138	0.034679150863017115	0.0252465	0.0655988	0.0678591	-0.105963	-0.149958	-0.0928226	-0.0540346	-0.0796741	0.0434978	-0.206712	-0.129623	0.0217405	0.0206345	0.094921	0.16698195190655643	0.14966383131342148	0.0832001	0.012224775214476935	0.0469275	-0.149514	0.0653102	0.11449988797741131
OXPHOS	0.14282649253990157	0.0358813	-0.0570812	-0.0369963	0.0031414	0.0662916	0.0356112	0.013385429060603561	0.00589351	0.016957790577486923	-0.0416133	0.0396959	0.0241161	-0.0527004	-0.0143027	0.010098090206751346	-0.0117436	-0.013449	-0.000174354	0.00537888	-0.0516571	0.017540933916228428	0.00989085	0.00970309	-0.0113359	-0.0419454	-0.0315558	-0.0122668	0.049892884751292485	0.0417385	-0.0277352	-0.0339138	-0.0443469	0.0524836	-0.033608	0.011056656596339837	-0.0141951	0.0360484	-0.0370607	-0.018386	0.0437789	-0.0358755	-0.00402808	-0.00682014	0.025402437699310897	-0.019389	-0.0116108	-0.00870585	-0.00637116
OXPHOS assembly factors	-0.00423073	0.1267748549518171	-0.123131	-0.0669843	-0.0504856	-0.05634	-0.0524743	0.0513523	0.042311114036212315	-0.168961	-0.0130941	0.1028957221007978	-0.000344591	-0.000573763	0.0551693	0.0358293	0.0407167	0.12904622625733422	-0.0184063	-0.0912351	0.057505	0.029379753708899815	-0.061297	-0.0231471	-0.00136849	-0.00896622	-0.0204655	-0.0706096	-0.01712	0.010886489009767176	-0.0391185	-0.0160666	-0.00628754	0.022120105364478743	0.096758	-0.0797516	-0.0881716	-0.042813	0.00268522	0.0348382	0.019962134715994378	0.050741	-0.00962945	-0.0272891	0.026144318487671684	0.047642624397563414	-7.4134e-05	-0.12908	-0.0286776
OXPHOS subunits	0.14286755700993164	0.0357644	-0.0569702	-0.0369086	0.00322682	0.0663348	0.0356763	0.013333907484721621	0.00586269	0.017062470699865995	-0.0415864	0.039616567789455555	0.024108650736303288	-0.0526839	-0.014342	0.010100143220229283	-0.0117693	-0.0135449	-0.000169924	0.00546328	-0.0517382	0.017528949838498915	0.00996412	0.00975008	-0.0113253	-0.0419291	-0.0315098	-0.0121984	0.0499289	0.0416903	-0.0277108	-0.033911	-0.0443345	0.0524435	-0.0336722	0.0110571	-0.0140631	0.0360416	-0.037	-0.0184038	0.043733	-0.0359357	-0.00405253	-0.00684257	0.025409773176867868	-0.01945	-0.0115847	-0.00861483	-0.00639325
Organelle contact sites	0.0624117	0.12030252657730738	-0.0775926	0.00724476	0.00164936	0.0626949	-0.0845756	-0.0182997	-0.116222	-0.123744	0.16481530098781064	-0.0724108	-0.00685696	-0.00118413	0.013627702018727369	-0.104698	0.034696154339251266	0.0570373	0.0264054	-0.0248854	0.13401599735787517	-0.0634846	0.1243851273197395	-0.0472209	-0.0429278	0.0180303	0.038107094172554354	0.12795858016923825	0.0856666	0.0502448	0.0608842	-0.253744	0.047479140206231264	0.0628505	0.00450243	0.1307047382822685	-0.0757452	-0.0942565	-0.140004	-0.148547	0.0192219	-0.23693	-0.0588344	0.0562831	0.0714009	-0.193854	0.0640303	-0.0411213	0.13752618913225553
Phospholipid metabolism	-0.0530889	0.0504588	0.0601334	-0.112809	0.00321623	-0.0470286	-0.0618982	0.0829403	-0.294843	0.00985651	-0.18888	-0.025653	-0.00758867	0.10989397937152295	0.025387	0.0993631	-0.0797418	0.030832633002088203	0.16679314451006608	-0.0306293	-0.0787097	-0.122686	0.00524824	0.0642021	-0.0499129	0.14593779502294796	0.0413859	-0.149826	-0.014194	0.028251	0.0499285	0.0555669	-0.134844	0.12235392819040085	-0.1042	-0.190222	-0.063939	0.12748438229942077	0.0349212	0.12349492010967539	-0.10063	-0.0924172	0.00173538	0.0672958	0.017756237421728955	-0.203586	-0.0380412	0.00803972	-0.0486044
Polycistronic mtRNA processing	-0.137569	0.024303286769784566	-0.045145	-0.0536301	-0.000581141	0.00179927	-0.00996493	-0.0146914	0.0713228	0.13263103486646122	-0.0290436	0.00474445	0.10696481332608382	-0.0243824	0.010933975866804372	-0.0404358	-0.0821208	0.034122425969764315	0.030984921975050816	-0.00154008	0.027929758233574173	0.0287663	-0.110339	-0.0866573	-0.00935692	0.066172	-0.0777035	-0.0320799	-0.0357472	-0.0803985	-0.0181816	0.022992148025286124	-0.0985293	-0.00946462	0.00961322	0.0915504	0.0577795	0.0324665	-0.0445126	-0.110659	0.0833491	-0.173434	-0.106762	-0.171916	-0.0116832	0.00970738	-0.0313429	-0.0957279	0.0649737
Preprotein cleavage	-0.0568828	-0.0720864	-0.176752	0.0695686	-0.0785925	0.00790133	-0.0293732	0.0434161	-0.0597082	0.057365713299525466	0.039812215646192244	-0.0725441	-0.00233966	-0.0337278	-0.0116136	0.027144805938977917	-0.0340239	-0.0363037	-0.0192732	0.021477791866207636	-0.0472555	-0.0141754	-0.0294232	0.049651035857375306	0.049969586689554424	-0.0201891	-0.0343905	0.012196607129498436	-0.05002	0.028799884359416814	-0.0896544	-0.117832	-0.0093364	-0.159359	-0.0106926	-0.057928	0.024594179686243695	0.0754616	-0.0289841	-0.0710619	-0.0265456	-0.176358	-0.0521862	0.044907893671616905	-0.0662599	-0.0216397	-0.0284955	0.11016611702525982	0.11529198957439125
Proline metabolism	-0.00707052	-0.0582735	0.077192	-0.0135923	-0.0987972	0.15908592279906994	-0.133161	0.0295079	0.0137936	-0.152826	0.0417722	-0.264088	0.0114272	-0.235401	-0.133592	-0.033005	-0.0677105	0.12031283243176401	0.0533174	0.17585919008847845	0.0169941	-0.0018201	0.0918994	-0.121754	0.12402952184360436	0.0698779	0.016258013506401842	-0.162039	-0.133519	0.030480470237984274	-0.12111	0.16075991672984544	-0.0625914	-0.0228226	-0.23924	0.0887648	-0.160515	-0.209947	0.0399575	0.2465056264613841	0.022490383035478283	-0.0525963	-0.0536431	-0.181082	0.031162909785967557	0.026964100872470514	0.0909009	0.00329089	-0.0752042
Propanoate metabolism	-0.0201071	-0.0602251	0.00148466	-0.116518	-0.0289022	-0.251804	-0.036108	0.021106351081330164	0.011696167930758755	-0.236708	-0.102569	0.0338625	0.11276082420359121	0.0184026	-0.0113942	-0.0353592	0.029980635034991866	-0.238485	-0.0843133	-0.0176593	-0.112045	0.00236846	0.0621201	-0.0312637	-0.00492744	-0.0223752	0.14285631539531515	-0.0763211	-0.00820019	-0.0382374	-0.0892944	-0.09678	0.00506346	0.0971441	-0.012676	0.126348	-0.0832083	0.0238099	0.037984403312248165	0.00612089	-0.0654452	-0.0827572	-0.0141681	0.0097969	-0.147391	0.027513812899218927	-0.147481	0.00581853	0.014142975963721629
Proteases	-0.140771	0.0434688	0.00109613	-0.0527214	0.0543565	0.031366249646217856	-0.0538494	0.028574	0.0447672	0.013312186186003843	-3.29024e-05	0.029649788171296737	-0.0788527	0.00968744	-0.0299498	-0.00692033	-0.0232334	-0.00302989	0.020060243126195088	0.0703649	0.0691401	-3.79098e-05	0.032173949813881456	0.0673814	0.0272174	-0.14224	0.0016138	-0.0430694	-0.00433737	-0.0315872	0.011527935444489544	-0.179501	0.0410933	0.0494069	0.0659053	0.10875848043691166	-0.0529516	0.053230940004960675	-0.0442671	-0.0859288	0.022499033123696704	0.0325385	-0.0965459	5.144478050655747e-5	-0.0790905	0.00746777	-0.14037	-0.076939	-0.167193
Protein homeostasis	-0.110765	0.0806959	0.015304016393951377	-0.105708	0.022262377217175423	-0.023983	0.0942484	0.0771241	0.11348716264407355	0.0319428	-0.0187349	-0.0258249	-0.0500891	0.0064657	-0.0270516	0.1023130434666821	-0.00268391	0.00741203	0.0393033	0.0302083	0.0914955	-0.00384882	0.1191688769175134	9.830868013006354e-4	-0.0336125	-0.109344	-0.0962705	0.058716146390943545	-0.0242118	-0.0443268	0.00333679	-0.117866	-0.0282188	0.0473754	0.0590251	0.0593982	-0.0718188	0.0489363	-0.0443645	0.00203686	-0.0224584	-0.036182	-0.0482844	-0.0230954	0.015506567649723286	-0.0309462	0.025748661190476113	-0.00592662	-0.172223
Protein import and sorting	-0.0790583	0.11328701973993562	-0.101556	-0.0376539	-0.0465892	-0.0216298	0.0698891	-0.0509657	-0.0662028	0.0167087	0.0144197	-0.112203	0.0867044	-0.0673061	-0.0635086	0.13429911827886387	-0.0131931	0.0477725	-0.0598543	-0.0600246	-0.106	-0.0112407	0.0514465	0.0542241	0.0496058	-0.0132175	0.0626577	0.11103834397009356	0.020986554015347936	0.034965315901467904	0.00650429	0.061735627643513806	-0.025384	-0.0955417	-0.047301	0.037588730304002456	0.0665955	-0.0248677	0.0420764	-0.0201929	-0.0278991	3.203489535391485e-4	-0.0706223	0.00148627	-0.050774	-0.0421745	-0.0447115	0.0517794	-0.0280613
Protein import, sorting and homeostasis	-0.100438	0.10889447185237189	-0.0537019	-0.0774272	-0.0268766	-0.0292299	0.0952	0.019600355411290776	0.019519003298256867	0.033613039411025544	-9.84188e-05	-0.0871206	0.024528544674904635	-0.0404287	-0.0547712	0.15062828406492115	-0.00640301	0.0360286	-0.010378	-0.0227809	-0.0125071	-0.0130536	0.10324951588603179	0.0379826	0.00693513	-0.0716479	-0.00905338	0.0958535	-0.0120651	-0.020566	0.00360868	-0.0137435	-0.0234975	-0.0252617	-0.0123268	0.0544349	-0.00709348	0.00221256	0.019143461592933047	-0.0146137	-0.0241045	-0.0354276	-0.0624058	-0.0135782	-0.00743725	-0.0299661	0.00433149	0.0432064	-0.0887346
Pyruvate metabolism	-0.0230521	-0.0773337	-0.155687	0.0835477	0.0939838	-0.0635719	0.029960828870216744	-0.0279841	-0.119526	0.0461894	-0.0574139	-0.134459	-0.0144375	0.022074676451569672	-0.0541143	0.0550337	-0.0253396	-0.0590396	0.012228282672274132	-0.0689288	0.0975932	0.10853406956402195	-0.146806	-0.0507585	0.0087925	-0.197328	0.0494744	-0.0195688	-0.0440261	0.11557025804806365	0.21161300946479006	0.0628308	0.26918741970486854	-0.0268253	-0.163759	-0.0279773	0.0796898	0.1033348723526071	-0.129209	0.0789168	-0.129118	0.0455934	-0.119827	-0.0813233	0.00648544	0.0570312	-0.019291	0.020542339377985504	-0.186963
Q-linked reactions, other	-0.02128	-0.150267	-0.0584039	-0.0825231	-0.0215951	0.1043064002111662	-0.00282767	0.048264075798346205	-0.0444101	0.0726388	0.00500404	0.0422467	0.12559873458961568	0.0909824	0.056792902112098635	0.012159104894896664	-0.0788667	-0.017046	0.0455445	-0.00626244	0.00975962	-0.0695693	0.00421019	-0.0759407	0.13958052699308013	0.055955	-0.0739419	0.0636813	-0.119687	-0.0368812	-0.0646272	-0.138185	-0.0218579	0.050815688820148655	-0.0571559	0.0361384	-0.0988714	-0.0258864	0.0623238	0.0568703	0.0748842	0.0900912	-0.0598847	5.59966461729575e-4	-0.0683627	0.0072552	0.045874937647069486	0.00202616	-0.0265081
ROS and glutathione metabolism	-0.0124079	-0.0124011	0.0251952	-0.181367	0.13430227726478453	0.0267795	0.0821145	0.1278379473943883	-0.247707	-0.0668263	-0.049584	-0.0411889	-0.0766351	0.0774689	0.15873725302768646	-0.0195357	-0.0215053	0.0414776	0.015861121819355447	0.0600061	0.084092	0.11526035820320635	-0.0373518	-0.00520144	-0.0682222	-0.0838027	-0.110981	-0.0968071	-0.0718673	0.061374927882788116	0.0860127	0.0711923	-0.0281945	0.011802	-0.000314455	0.10956750345260052	0.028951466195968664	-0.00247807	0.0438686	-0.0241952	-0.0722891	-0.018116	0.0520464	-0.0261901	-0.0168392	-0.0155536	-0.0869176	0.12061265078895526	0.11245520828997667
Respirasome assembly	-0.0615142	0.00776318	-0.0114687	0.053294	-0.0958929	0.0590738	0.0903983	0.10858345378842695	-0.0219768	-0.0731259	0.1923305885988902	0.30250794210435067	0.13264661271493458	0.031085343744391328	0.26070093063366945	0.1970300809716495	-0.0682161	0.0481885	-0.0606476	-0.210176	0.18241058621950684	-0.0281057	-0.088261	1.3608063090813364e-4	0.0853245	0.14515049180216114	0.00946298	-0.0857043	0.15084028710633218	0.0374046	0.21896688224356325	-0.0553688	-0.0295824	0.024471017612541415	-0.0434569	0.0376994	-0.0614908	0.045506936850103624	0.19471886909264163	0.00627006	-0.071338	-0.00362531	-0.0379409	-0.0996162	0.2580196290415645	0.0771797	0.092493	-0.0176256	-0.072041
SAM	-0.0857592	0.046234686819991336	-0.0911516	0.012629	0.10808761776696889	-0.0545217	-0.181898	0.051019152358572656	0.020775347732471836	-0.0317369	-0.010634	-0.122515	-0.0484233	0.0784425	0.17464298712079085	-0.00696762	0.0788075	0.0606886	-0.119174	-0.0782487	-0.246069	-0.0250132	0.13082743237647299	-0.100434	-0.063562	0.014892961114591381	0.10943586068767022	0.0387852	0.0841167	0.034919497722641094	-0.0420452	-0.0731907	-0.209017	0.0604105	-0.200942	0.0573272	0.1328644228047485	0.0514112	0.00437876	-0.0347516	-0.0740181	-0.0112789	0.0440451	-0.00703432	0.053167714351060935	0.014962602251400444	-0.0241911	-0.0437501	-0.0269149
SLC25A family	-0.111148	0.017053509360508784	0.0145673	-0.0361925	-0.102658	0.15091113066807973	0.10151971882041944	-0.0850186	-0.0517063	-0.114596	-0.0433421	-0.0197098	-0.0499367	-0.085151	0.012573922542452515	-0.0116849	0.17133218800528566	0.0708559	0.10708968574488555	0.058533395456060164	0.058266415066692875	-0.0504928	-0.128643	0.18139124812101826	0.061245458404728975	-0.0537783	-0.0172493	-0.0574722	-0.00934785	-0.0463664	-0.0522874	0.0796855	0.00595772	0.1904425754541798	0.0302692	-0.0925754	0.10270038685194015	0.00422357	0.010385995595161629	-0.130613	0.0116341	-0.0435284	0.0668281	-0.0274157	-0.108958	0.0572748	-0.0616955	-0.0751541	5.73870382054028e-4
Selenoproteins	-0.0198722	0.0630702	0.023967565084803754	-0.0835483	0.2412020012069648	0.0382588	-0.16763	0.11077755057930293	-0.0744695	-0.0115783	-0.116646	-0.0215364	-0.0235011	0.019642682776528367	0.022280890543664656	0.0377572	-0.0856028	0.12469589596722219	-0.106007	-0.0179096	0.066917	-0.00625474	0.0653833	0.048021795968502964	0.18294147768393074	-0.065415	0.0879666	0.1393507252158193	-0.0204628	-0.0361004	0.032987186805907696	-0.0564828	0.0899349	0.0712069	-0.0293213	-0.0312789	-0.00214348	-0.0225831	0.10089677708073191	-0.0910927	0.2170600881077559	-0.0164024	0.11379939763765894	-0.135767	0.0486049	0.00477485	-0.117593	0.00632036	-0.0862149
Serine metabolism	-0.00616181	-0.0955041	0.021106876569003855	-0.215517	0.023791896408442856	-0.00670902	0.00608353	-0.0731678	0.0379983	-0.00337161	0.17082311333282194	0.0763767	0.0495188	0.1261191769154369	-0.0347674	-0.00578881	-0.0050551	0.0372842	0.15586491426861618	-0.0565828	-0.0657863	0.087758	0.037403332936161576	-0.0317413	-0.0977982	-0.116498	-0.0800648	-0.0656314	0.0934341	-0.0456476	-0.0839705	-0.0211649	0.061615489206915154	0.012229941545383849	-0.0536907	-0.0196442	-0.03144	4.186207547375885e-4	0.12094987079088577	0.0603057	-0.156933	0.060381	0.031607	0.11293042698379928	0.00271977	0.045350381464381265	0.045941	-0.0358251	0.0528275
Sideroflexins	-0.00921184	0.063508	0.013765732389960152	-0.168589	-0.21595	-0.0107015	-0.0409658	0.038623949211073996	0.0662485	-0.0539231	0.10843712120154657	-0.0160512	-0.0927903	-0.0183708	-0.0982563	0.0149502	0.013842357569554055	-0.0552997	0.0903958	0.14203820150716417	0.027738993294593475	-0.0600103	0.13372874492499082	-0.0928247	-0.0337455	0.0857778	-0.104147	-0.0558783	0.0709719	0.23760148342867426	0.0912865	-0.143629	0.14759683968372517	0.1971444015324666	-0.118973	0.016848935862393027	0.2352772970664295	-0.15704	-0.0121843	0.0175155	0.0534449	0.00576575	0.0637111	0.15970227953913826	-0.0454431	1.5893775254957166e-6	0.0785728	0.10225564185458678	-0.0032926
Signaling	-0.102509	0.00243569	-0.0303979	0.0843721	-0.0955024	0.16052977057517587	0.0847511	0.0315432	-0.100799	0.00898949	-0.0443683	0.0531926	-0.00163695	0.12807997029253476	-0.219771	-0.0587514	0.11521677103216298	-0.0277507	-0.0779854	-0.031775	-0.0823553	-0.0538884	-0.0687253	-0.157318	0.030726154819747255	-0.0149792	0.017589101930280408	0.013420166125465137	0.064470192019556255	-0.0633443	-0.0254465	0.00123459	0.023423866543583194	0.0757779	0.00641297	-0.0620924	-0.020881	0.0050166	0.030350090387720574	-0.127073	-0.0167214	-0.0265585	0.0254114	-0.027531	0.10890522956939527	-0.0396539	0.019492475012136357	0.0203278	-0.0618049
Small molecule transport	-0.119677	0.010225419983756145	-0.0726651	-0.0153295	-0.100101	0.11031596774199634	0.069766	-0.0618826	-0.0681589	-0.114616	0.0243305	-0.00146215	-0.0695646	-0.0427665	-0.0085808	-0.0644797	0.046845635153180715	0.018836505327136772	0.053064295094464684	0.04012	0.0708873	-0.098732	-0.0776434	0.15475488895221082	0.064832	-0.0883715	0.00429294	-0.0344375	-0.0119829	-0.0566674	0.0378825	0.058554761104060486	-0.0489655	0.17375422882905397	0.010943966196637627	-0.031526	0.12415044289470996	-0.02644	0.0332383	-0.0755104	-0.0316364	-0.03504	0.0815606	-0.102489	-0.148104	0.00887685	-0.0741042	-0.0205466	0.00421487
Sulfur metabolism	-0.0576179	-0.131123	-0.00196745	-0.00324686	-0.0445414	0.025743713194721043	0.0264304	-0.00116755	-0.023974	-0.0680221	0.0825816	0.056717132074701145	0.2594866320444263	0.0936081	0.208551	0.16668630671299475	0.0696034	-0.110293	0.020484894527411535	-0.0862179	0.0382226	0.0415126	-0.0640802	0.0174866	0.0660848	-0.0355198	0.047788223385663166	-0.0145073	-0.041909	-0.0239534	0.14526227938369396	-0.0406942	-0.0740015	0.20337093249685115	-0.00595361	0.0864973	-0.0782443	-0.028567	-0.141231	-0.0308337	0.10823459461147907	-0.0191808	0.11651141519295444	-0.199191	-0.180077	0.0489272	0.0640599	0.21872549073339773	0.0971945
TCA cycle	-0.0504105	-0.101896	-0.165331	0.056331	-0.0531077	0.011376139134016926	0.012900478145510812	0.038736235744108095	-0.0592753	0.0904399	-0.00584763	-0.0510075	-0.0024026	-0.0329416	-0.0160733	-0.0188173	0.00431708	0.010644	-0.0345686	0.0501028	0.0329169	-0.0479452	0.032485	-0.0181454	0.0248375	0.0825634	0.0541985	-0.0256642	0.025177	0.0484461	-0.093144	-0.0234845	-0.0398841	0.00257096	7.636242212252237e-4	-0.033914	0.0366934	0.0293445	-0.0420096	0.00932304	-0.0463229	-0.00782676	0.019063364722538886	0.0240636	-0.0150686	0.021556250071680372	-0.0569993	0.0066734	0.0441139
TCA-associated	0.0283969	-0.0980006	-0.0898708	-0.0995239	0.0836977	0.1506223510279288	-0.155834	0.012134326491025471	-0.0046728	-0.0670446	-0.0235735	0.0625995	-0.0426359	-0.162165	-0.0499189	-0.00990016	-0.00440378	0.0446763	-0.00115034	-0.0906626	-0.0665434	0.010603817733059746	0.017574149087085347	0.1424052634684782	0.0356671	0.062306839443782944	0.10148946284189281	0.030721851407412036	-0.125485	-0.0159261	0.0576766	-0.0649714	0.0635914	0.029062014271015197	0.2095184453949311	-0.0533641	0.022430182287642104	0.011670884949007322	-0.24496	0.0737751	-0.210463	-0.217039	-0.159283	-0.05162	0.10252876345241706	0.0284998	-0.0794802	0.030369313018752096	0.14454081243499448
TIM22 carrier pathway	-0.12006	0.050072	0.042751651865986284	0.0452864	0.0638776	-0.047449	0.014034046425412849	-0.0847056	0.033041	-0.059143	0.0185208	0.19921061337972992	0.030934582351367684	-0.116873	-0.0723911	-0.0206244	0.0281008	0.0408015	0.086254	0.038239470507644306	-0.109141	0.00209364	0.12489856360654052	-0.171144	-0.0214452	0.14807446691054715	-0.00527445	-0.00634672	0.0564465	-0.0270835	-0.0672257	-0.0619059	-0.0781346	-0.0046695	0.00289943	-0.083668	0.1292207863333719	-0.167937	0.00870572	-0.0367328	-0.130368	0.0703508	0.2502755618042495	-0.087863	-0.0300748	0.013758207796661757	-0.194249	0.0709902	-0.0470819
TIM23 presequence pathway	-0.0616309	0.11299053952328605	-0.079773	-0.073508	0.0966223	0.051402985087224594	-0.016453	0.013017797228479946	-0.0428413	-0.10323	-0.0283068	0.0785986	0.055200038808484946	-0.148764	0.12212281464693191	-0.0919775	0.0758561	0.0682672	0.049470754292623154	0.0562052	0.16262744993929482	0.0721339	0.0360878	-0.198744	0.0319472	0.0870689	-0.0504038	0.0926688	0.0296305	-0.00135534	-0.162291	0.031114166498169515	0.11954933537127974	-0.0910678	0.12390420271295755	0.0321239	0.19360561078759805	0.16907773982243754	-0.0530946	0.031470412118120135	-0.0134091	0.0818026	-0.0689159	0.030893228507488716	-0.113826	0.12102314210562434	0.025108376861850586	0.0703505	-0.0139528
TOM	-0.0135963	0.1455543228652851	-0.0116297	-0.0656231	-0.0838509	-0.0499017	0.10807385137496514	-0.0774562	-0.0655226	0.027957591278891258	0.0266353	-0.115682	0.0981884	-0.0661719	-0.101747	0.18735629193908312	-0.0270269	0.0534446	-0.0620247	-0.0584826	-0.12095	-0.00223941	0.0405984	0.10560600202544236	0.0591644	-0.0274892	0.0955977	0.10584548129759751	0.00613803	-0.00542425	0.0955186	0.16906556433870965	-0.015515	-0.0105539	-0.0718495	0.0543055	0.034490676139489605	-0.0994922	0.11602628979681583	0.00443934	-0.0216203	0.0377245	-0.0522933	-0.0411382	-0.00264196	-0.0623531	-0.00728776	0.025051091248726162	-0.0599954
Tetrahydrobiopterin synthesis	0.1293798651330957	0.0750363	-0.0100926	-0.0726805	-0.0498266	0.0388196	0.00347892	0.019851091759743436	-0.00410542	0.018840385513412255	-0.000668366	-0.0512286	0.020817790848134426	0.0360698	0.010600727960820493	-0.0213663	0.0377477	0.027444185984365533	0.0320605	-0.0513141	9.46813061788147e-4	-0.0483565	-0.113717	-0.00562311	-0.101173	0.20027895123082623	0.11197636770241944	-0.0794953	-0.0284123	-0.136082	0.034236	-0.0534974	0.050806568039572196	-0.0339468	2.619121442111105e-4	0.00248052	-0.0106295	0.0455838	-0.0569923	0.057264604374873775	0.11976429441753372	-0.0970667	0.0799519	0.0442282	-0.0708328	0.0730573	-0.0810062	0.0340857	-0.203308
Trafficking	-0.0572261	0.0512786	0.0597542	0.0653117	0.022830425709783705	-0.189243	0.0642908	0.036065321798919636	0.061985	-0.215558	0.2003657736042497	0.0391081	-0.232706	0.0671158	-0.0788118	-0.057414	-0.0706177	0.00661677	0.028028467444655567	0.022895056531660685	-0.0847979	-0.0561842	0.00853502	0.016918282611236714	0.12230031423885242	-0.0571755	0.00600065	-0.02735	0.039307487377846936	0.0838456	0.030848867638025915	-0.155568	0.0026618	-0.0232449	0.01911	0.0932034	-0.13911	-0.0522144	-0.0485606	-0.0929688	-0.0846261	-0.0341618	-0.090507	0.1527752654998538	-0.0294738	0.1745906855195272	-0.0290022	0.0700873	0.023431483344109494
Transcription	-0.120365	0.00341288	-0.0218234	-0.0705214	0.13722657425700235	0.13535793029537976	0.020260614605823197	-0.0227832	0.00624521	-0.0117101	-0.0428032	0.0711028	0.0673668	-0.068418	0.0716168	0.0160699	0.0567116	-0.108538	-0.0157961	0.019090740741120386	-0.0260172	-0.107624	0.022185771534945883	0.0499429	0.0389057	-0.0565597	0.00782638	-0.0576931	0.0757989	-0.0145474	-0.0156362	-0.0132805	0.13552506450771512	-0.117731	-0.0688709	0.028689517859821132	-0.0349907	0.045056890048955064	-0.11842	0.1036312416363416	-0.0600907	-0.0209202	0.10706178983668027	0.00988155	0.0768181	0.0367764	-0.0374241	0.052134144673406276	-0.0234314
Translation	-0.10523	0.10485054943289025	-0.0855957	-0.0524814	0.0341487	-0.0348526	0.016931668525292782	-0.0357965	0.0582691	-0.0136622	-0.0604556	0.00670469	0.0952891	-0.0115585	-0.00685433	0.00210398	-0.0105605	0.00188505	-0.0123686	-0.0287571	0.0160011	-0.0271333	-0.0243934	-0.048114	0.010245197383593549	-0.0434045	-0.0285905	-0.00989776	-0.0462224	-0.0119292	-0.0466988	-0.0169932	-0.0464642	0.010273967104957812	-0.011379	-0.136368	-0.0170464	-0.040017	-0.0541072	-0.0544596	-0.0112109	0.0510109	0.0712904	0.0408225	-0.0316798	-0.0367792	0.1261131598171179	0.0738715	-0.0005165
Translation factors	-0.067602	0.0542089	-0.084516	-0.0588002	-0.150597	-0.144386	-0.0731015	-0.000755057	0.0818494	-0.132154	-0.173578	0.0316646	0.0830992	0.0430883	-0.0530977	-0.0510027	-0.0539429	0.0271808	-0.0554042	-0.121317	0.023236	0.0315057	-0.0693227	-0.0432825	0.1128000881320532	-0.00756602	0.0760377	-0.0173647	-0.126135	0.21927811880033868	0.0197298	0.0343877	0.020019310218848865	0.033451	-0.0454628	0.014691500631088915	0.00515873	0.18738288889492424	0.0726515	0.0846947	0.0970575	-0.0452506	-0.00751081	0.11859167205841599	0.0173462	0.11449647812706505	0.17809828895094257	0.0510656	-0.0548215
Type II fatty acid synthesis	-0.0462678	-0.0288661	-0.15866	0.0675273	0.029195503047420527	-0.0341173	0.0413101	-0.0660604	0.0376092	-0.21122	0.0326919	0.17957520706169336	0.0221604	-0.0721995	-0.0867661	-0.0318749	-0.16732	0.0721635	0.10668327914208342	-0.0418963	-0.148326	-0.0893285	-0.149029	0.078532	-0.127579	-0.0604444	-0.0179607	0.14924757559864682	-0.22154	0.0415872	-0.0106068	-0.021651	-0.0358589	-0.039889	0.00328165	0.1577625650036799	0.032049128024573686	0.0713498	0.042655	0.019947663384056125	0.028676242842567527	0.00477563	0.0663516	-0.044106	0.0843264	-0.177612	0.148024	0.048164823250051586	-0.00831589
Urea cycle	0.0031204	-0.120371	0.0337344	-0.164743	-0.00190611	0.0681146	-0.0855732	-0.0272165	0.042970436217982313	-0.0993187	0.17333925226111632	-0.0635399	0.0406087	0.029625208949419377	-0.109355	-0.00741022	0.011361714051578283	0.0943888	0.10509843847750429	-0.0215263	-0.0495673	0.021762046405797444	0.00586967	0.00737109	-0.129551	-0.0975613	-0.0330322	0.014251594376293425	0.14111266302170397	0.0258842	-0.1446	0.0580712	-0.0108773	-0.0947908	0.023847822399419266	-0.000538354	-0.0277803	0.0445406	0.0851695	0.029616187462677294	2.3693415756546543e-4	-0.107269	0.020981	0.0448414	-0.0317061	0.0418912	-0.0844081	-0.0740475	-0.00347201
Vitamin A metabolism	-0.02733	-0.0764735	0.0633478	0.0733548	-0.0652463	0.15425818482844655	-0.117152	0.0668151	0.0407985	-0.128781	0.064312	-0.0820541	0.0751048	-0.0520805	-0.135577	-0.250882	0.00930238	0.040167135999494265	-0.274584	-0.314973	0.16656582268230535	0.10594416626950175	0.0820996	0.0751192	-0.0878282	-0.0328276	-0.146562	0.1066600709007811	0.2078053907182649	0.0170611	0.0396514	0.0811273	-0.128686	0.0689218	-0.0524103	0.0449172	0.0342541	0.026058399402273114	0.0114109	0.072521	-0.147421	0.11303028912682742	0.017808929715355092	-0.10603	-0.0354641	-0.0803501	-0.00902345	-0.000926738	0.0657091
Vitamin B1 metabolism	-0.0527806	0.075059	-0.0223178	-0.0733044	0.10561403062188332	0.0989492	-0.0946233	0.14302435760658574	0.1869017813731582	0.14825182407223234	-0.128804	-0.031431	-0.0107781	0.11905071100516429	-0.0567418	0.049769875664873627	-0.0331623	0.022150205437220426	0.11746574319211386	-0.0505895	0.16284458814272287	-0.13611	0.1885176699133991	0.13788278483554992	0.021926699405220802	-0.0908986	0.14565443260673178	-0.0519394	0.014943405553885411	-0.07704	-0.0108908	-0.131013	0.1138015192437667	0.0682295	-0.0965451	-0.146332	-0.0419057	0.030720469011900342	0.0976883	-0.0330331	0.017688162440555797	0.14575044890681543	0.046464711737001306	-0.104169	-0.0371191	0.034245992518003435	-0.0330667	0.010751684904234214	0.27117027107504704
Vitamin B12 metabolism	-0.123695	-0.0500254	-0.00226022	-0.124722	0.00805243	-0.0224053	0.017834509347141807	-0.0415509	-0.0517253	0.028071671992385312	0.058024378641531094	0.00416807	0.00164162	-0.0269282	0.0833413	-0.0684524	-0.0407028	-0.149335	0.0396442	0.00691306	-0.150287	0.15442261180924732	0.041691483432996834	-0.0585378	0.011400628313115889	-0.0386392	-0.0195826	0.033210750772270224	0.00186403	0.0175979	0.0793799	0.0985779	0.031839240879823164	-0.0682011	0.036026073988783006	-0.104484	-0.174724	-0.101167	-0.111252	-0.0943687	-0.0808454	-0.218645	0.0807226	-0.111404	0.0655582	0.13972536751488202	0.011099418232229536	-0.191008	-0.0431157
Vitamin B2 metabolism	-0.1134	0.051001276983469894	0.053538493650700264	-0.0676413	-0.0844552	0.026399567379704718	-0.112652	0.068226	-0.0113106	0.043646182266979146	-0.0347227	0.0634438	0.024579910961741266	-0.0134978	-0.100542	-0.02881	0.11847308279237775	-0.104481	0.0688309	0.023479348510419717	0.15859325053349582	0.15306739788218934	0.10726912612135468	0.20938859370741464	-0.0941007	0.12069735203859008	-0.0527293	-0.102026	-0.0673374	0.10380891001546823	-0.00398779	-0.030797	0.013389459701955828	-0.00629121	0.00513285	-0.00738851	-0.0374018	-0.0300468	-0.0890789	-0.208941	-0.0593381	0.24016711869857807	-0.278444	-0.0540649	0.1985465879622324	-0.0265611	-0.135917	0.12780194529678718	-0.0741676
Vitamin B6 metabolism	-0.0219231	-0.061397	0.0374849	-0.148056	-0.154055	-0.108912	-0.0560294	-0.0699987	0.10406226126383265	0.13793408125600742	-0.0704355	0.0478955	-0.0134558	-0.000115961	-0.0040076	0.0930694	0.2670474144019425	0.16535315608875842	0.13419583457030868	-0.0378748	-0.0024064	0.0233502	-0.208421	-0.118036	-0.135418	-0.110764	0.12278712066484807	0.00583208	-0.0941671	0.00927373	0.011054516027019066	0.0206349	-0.0436831	0.15863211987756481	-0.0966537	0.16245521009397557	0.10395470006972032	-0.0285964	-0.0921936	0.014754038899126343	-0.128622	-0.0311034	-0.0634351	0.0741048	-0.102188	-0.166733	-0.128365	0.0614002	0.17226533671461502
Vitamin C metabolism	-0.0159	0.0797729	-0.0461484	-0.095163	0.0448817	0.026770539911186345	0.10162785873145727	0.2604653760524149	0.11765852971956904	0.0411034	0.0855791	-0.158981	0.050525	-0.0264528	-0.00814453	-0.135802	0.21976019842178954	-0.0791823	-0.00182963	-0.181284	-0.106943	0.0172008	0.030267250185678312	0.15287139671599348	0.13392709685419305	0.0744411	0.042683997534690855	-0.0879783	0.022212744770559505	0.19079594488901652	0.10197979888627148	-0.0047287	-0.0921441	-0.171812	0.24634341726678144	0.061992561975811905	0.0467799	0.0797515	0.0658786	0.00147551	-0.0679204	-0.00271829	0.0567946	0.0999399	-0.172896	-0.146539	0.14487542604657067	-0.0968897	-0.0521895
Vitamin D metabolism	-0.0171008	-0.0135911	0.041243450825473225	0.00675876	0.1335243481458764	-0.0377126	0.20454080490528337	0.28248066709516323	0.21334755969478703	-0.0556318	0.014584071062747304	-0.0858308	-0.0845607	0.033398	-1.23252e-05	-0.0521596	0.018731184563203686	-0.0761173	-0.0270777	0.0866762	-0.0238081	-0.0602605	-0.153751	-0.0113059	0.0405425	0.023804266033649428	0.0418176	0.024126346820072593	-0.0729231	0.0568206	-0.0996518	0.0422122	0.012447982427875301	0.025292253047096765	-0.113328	-0.0958852	0.0387644	-0.0867925	-0.0280615	-0.0778973	0.027352981911591898	-0.064265	0.08508	-0.120587	0.0980976	-0.0166267	0.0816588	0.0787732	-0.0604889
Vitamin metabolism	0.047945	-0.0497077	0.042208256387615155	-0.211777	-0.0427893	0.069397	0.029336141417638434	0.1075545669759356	0.033927511011572646	-0.0411699	0.00197288	-0.121242	0.039843948269797376	0.036076459711634104	-0.117601	-0.159033	5.610118206823862e-4	0.038097929562582664	-0.117368	-0.251782	0.059225	-0.031809	-0.0469616	0.0225781	-0.0822626	0.2137948717039478	-0.0256807	-0.0669944	-0.00584962	-0.185517	0.034156	-0.0771004	0.0748818	-0.0684286	-0.104961	0.037988706949522645	-0.0166762	-0.0154895	-0.101058	0.012560008760448126	0.0255825	-0.0394652	0.1026424413539177	0.014091433449233519	-0.0621528	0.12010626280393809	0.016247533387709095	0.0487682	-0.0641301
Xenobiotic metabolism	-0.00705499	-0.131649	0.11890586096409546	-0.104382	0.0570235	-0.00779101	-0.00544833	0.0626892	-0.063279	0.037873363947869026	0.0541267	-0.000424524	0.030344294420722118	-0.0166689	-0.0360562	-0.00307369	-0.0943365	0.0834455	-0.0983423	-0.139061	0.040793630889453945	0.0389134	-0.0655997	0.0474624	-0.0252217	-0.01138	-0.117306	0.0335469	-0.0541579	0.0746015	-0.136475	0.0664752	0.00924905	0.0754581	0.0136023	0.0361078	0.0509608	-0.113125	0.0977014	-0.10135	0.11358458847161518	-0.0173102	0.0542682	0.022984954187558252	0.0720336	-0.0687584	-0.0388105	-0.137936	-0.038519
cAMP-PKA signaling	0.00187782	0.0394922	-0.0169132	0.0787647	0.2081261838928672	0.024770376991908254	-0.0641886	0.0078202	-0.0630606	0.013603502096905423	0.0825626	0.0932528	0.0744608	0.12524207263035736	-0.312754	0.19826193293790795	0.26346443228097993	-0.00789808	-0.131266	0.048362274815344615	-0.129732	-0.248771	-0.0619268	-0.0172697	0.0360203	0.10108554407458749	-0.348761	-0.132166	-0.0373725	0.2487528471928944	-0.0245134	0.11816620890020563	0.25372438409625575	0.0635346	0.11613940615263131	0.11323294092503579	0.0173709	-0.000884213	3.4015936818187337e-4	0.021993993756818014	0.036975973799849224	-0.0527139	0.0707835	-0.0962136	8.465798794222909e-4	0.035593077041897854	0.028250148410390034	0.031238296427058432	0.095779
fMet processing	-0.0390256	-0.0214405	0.10897828925553976	0.0112836	0.16630143278952483	0.026307	0.12151728233555316	-0.233912	-0.00680928	-0.0811625	0.11018284277219208	0.01049	0.011581456467001709	-0.0362019	0.00231643	0.15640292341525844	0.18973716886941924	-0.071721	-0.147888	-0.00354012	-0.0492422	-0.0723023	0.11622572119518768	0.056834740278071436	0.0121005	0.00697051	0.0606428	-0.268388	-0.0179481	-0.0051632	0.022401874711664747	-0.067819	-0.199228	-0.0742225	0.0752479	-0.0134058	-0.00651106	0.15622902745428385	0.031803667233724485	0.00196708	0.11620689322046798	0.0713614	-0.016589	0.023866247027792598	0.0838248	-0.0131536	-0.0998871	0.00679144	0.0862133
mt-mRNA modifications	-0.075229	0.1152930538958744	0.00819284	-0.0801011	0.10711832930249163	0.0697766	-0.134806	-0.00312013	-0.0126063	-0.0120669	-0.0167703	-0.0623961	-0.130819	-0.0126217	0.0986684	0.055151355440102544	0.0096924	-0.14369	-0.100906	-0.0546042	-0.0437015	-0.00641644	-0.018194	0.0477316	-0.0138397	-0.074129	-0.0494807	0.0480615	0.0763609	-0.0309589	0.00559202	-0.0350196	0.021654295398840593	0.057134	-0.0776382	0.0509692	-0.0268597	0.023789337874461493	-0.00392451	0.1308772647008956	0.042668	-0.0325715	0.0512424	0.033270678087625925	0.0264123	-0.058448	-0.0263805	0.0882742	0.0243015
mt-rRNA modifications	0.0480172	0.1499111275707987	-0.0663719	-0.0677738	0.025458038477704215	-0.00342266	-0.082247	2.870021369844687e-4	0.0062701	0.016643783550112198	0.039711928737977464	-0.130682	2.2136973417304003e-4	0.0808589	0.010377913433695438	1.7630453897614427e-6	-0.0452198	-0.0821089	-0.0327982	-0.00479118	-0.00713502	-0.0619606	-0.111746	-0.039673	0.016388205995609317	-0.111417	-0.0176376	-0.0905493	0.042820735019189524	0.0779706	-0.0145477	0.1053272130848047	-0.0919332	-0.0845209	0.029808434539626536	-0.152483	-0.0678897	-0.0615697	0.0822801	-0.0331169	-0.0388951	0.0519986	-0.155814	-0.0196589	-0.0898117	0.0518739	-0.106708	0.0651363	-0.0100942
mt-tRNA modifications	-0.139307	0.043752	0.0334959	-0.0625302	-0.00945577	0.00812066	0.0493445	-0.0696333	0.00909401	0.0615665	-0.0114702	0.0347467	0.049538355033821146	-0.0215242	-0.036488	-0.00960351	-0.033908	-0.0414668	0.0828314	0.010222379545011352	0.011013631417830782	0.029133	0.0844641	0.10413188834476403	-0.0533301	0.0891736	-0.0399577	-0.0533848	0.037980146150810676	0.061482518915409484	-0.0112526	0.010539	0.014699848000210056	-0.0385574	0.010464550798791597	0.0724944	0.0701273	0.033837	0.0231442	0.0632673	0.065939	0.12123484075515195	-0.0659308	0.0707412	0.0837275	0.015009486667736913	-0.0653225	-0.134885	-0.0868085
mt-tRNA synthetases	-0.14019	0.0415996	-0.0078228	-0.0187624	-0.0475265	-0.056656	-0.0494696	-0.0347034	0.0658612	0.0668759	-0.0176319	0.021574062682817412	-0.0567598	0.064225	-0.00102348	-0.00408656	-0.134562	0.00820042	0.0540992	-0.00627818	0.00205573	-0.040271	0.0430999	0.0402809	0.011947523411179887	-0.0758446	-0.0637355	0.0598088	0.0420496	-0.0107097	0.030916022516763685	-0.0109895	-0.0786775	-0.0506021	-0.159257	0.13491404330125267	0.0435617	0.033955881696127045	0.0340994	-0.085283	-0.0197925	-0.105665	0.0975234	-0.0691379	-0.0259214	0.1341373477264364	0.023400572230751645	0.00731515	0.0497256
mtDNA maintenance	-0.130117	0.0761739	-0.00376971	-0.0844194	0.010589156676229904	0.0528758	0.0197733	-0.0164321	-0.000683906	0.0453381	0.00471506	-0.00562658	0.021336690829494923	-0.0590054	0.00310395	-0.0186061	-0.0418986	-0.0718669	-0.0779931	0.0401543	-0.0412723	0.0015582	-0.0988397	0.0464243	-0.0197921	-0.00677499	-0.0279746	-0.0351863	0.0395101	-0.0014019	0.035553596250719584	0.00621576	0.0456219	-0.0435764	0.0277033	0.0901349	0.0521566	-0.0198117	-0.0823819	0.0801328	0.0689323	-0.00355776	0.00616127	0.00988067	0.0348358	0.0395973	-0.0075897	-0.0210749	0.039405
mtDNA modifications	-0.102082	0.0845414	0.026924752150867266	-0.0518335	-0.0605769	-0.0104732	-0.07276	-0.0162692	0.0876215	0.16664209832612134	0.00405722	0.0840518	0.010686476656300343	-0.0523351	-0.177085	-0.011626	-0.0475355	0.1170698311729076	0.062499	-0.0363193	0.1512704955990632	-0.0492211	-0.134195	0.0619488	0.0968003	0.040648	0.0899137	-0.057661	0.0523371	0.14122768999557003	-0.0800757	-0.0225861	-0.0399716	-0.00961444	-0.103192	0.1485289888903216	-0.133185	0.15381218081084114	-0.117238	0.1479099459878899	-0.147675	-0.0445404	0.24429428870580897	-0.0812567	0.035764	0.024233684555103573	-0.0302866	-0.0735286	-0.0010718
mtDNA nucleoid	-0.134304	0.0579891	-0.00388918	-0.0533455	0.0949826	0.0186676	-0.00703914	-0.0528773	0.0574685	-0.00851418	-0.0345071	0.0143761	0.0659149	0.00876292	-0.0242466	-0.0193903	-0.0425095	-0.0658644	-0.0208411	0.012126021520855576	0.0200154	-0.0508322	-0.0592169	-0.0258583	-0.0391153	-0.00634636	-0.00426661	-0.0179679	0.0663415	-0.0392497	-0.0410365	-0.0022845	0.0077125	0.012750939171207275	-0.0291015	0.0783739	0.1985699947845318	-0.0465871	-0.121098	0.00182468	-0.0584815	0.0998728	-0.0564803	-0.0281178	0.0852063	0.0945798	0.0806717	-0.0268782	-0.0535314
mtDNA repair	-0.121002	0.0786771	0.014329236324336306	-0.0790936	-0.0507436	0.0447257	0.034435727330514476	0.00711788	-0.0294094	0.0904607	0.051950076521140975	-0.0260486	-0.02478	-0.1213	-0.000604531	0.00342322	-0.0411484	-0.0557054	-0.119224	-0.0152767	-0.0747071	0.021876187497536385	-0.117831	0.0873543	-0.0324265	0.00540004	-0.0331035	-0.0683463	-0.0209077	-0.0245587	0.0727483	0.027680489246432943	0.0534657	-0.100956	0.0979996	0.12146455541599835	-0.00298721	-0.00113531	-0.0581958	0.0860479	0.2937293246196845	-0.0161038	0.0514876	0.048406030978209884	-0.0244989	0.034230212764425776	4.231094904124037e-4	-0.0077788	0.18476975088204928
mtDNA replication	-0.135802	0.0637466	0.0159721	-0.0639977	0.044199843430337706	0.0305468	-0.0326326	-0.0231347	0.019961356266621835	0.028074512870353844	-0.0394771	0.0336887	0.043050383490465464	-0.057301	-0.00777583	-0.0213037	-0.0558111	-0.0810798	-0.0376474	0.0407363	-0.0571979	-0.0684635	-0.0603915	0.010595823588362058	-0.011114	-0.0379389	-0.00451774	0.0264776	0.0661396	0.00302435	-0.0305928	-0.0651493	0.0793191	-0.066853	-0.0893074	0.0968425	0.0682814	-0.0354713	-0.077274	-0.00823455	-0.104706	0.029361980325822136	0.017454772638770794	-0.0937984	0.10395541638699181	0.0582487	0.00617655	-0.0344141	0.00600165
mtDNA stability and decay	-0.0479416	0.0329727	-0.111119	-0.0316792	0.10606018496797565	0.12677306295125593	0.045586486294267904	-0.103271	0.054637118707013634	0.0543207	-0.0534368	-0.0399896	0.2543675524433735	0.10769298916050474	-0.0622009	-0.12618	-0.083834	0.11861123430885555	-0.0529044	0.36828046868593856	-0.0700185	0.12171970227014199	-0.168694	0.0529072	-0.178992	0.0234502	0.0533997	0.0827528	0.12191661561489645	0.0789227	0.19077976267256544	-0.17667	0.0502514	0.0833173	0.11553966419389156	0.00723216	-0.11916	-0.0609834	0.22403652641531407	0.1990814210351704	-0.024813	-0.0323877	-0.00170806	0.012702567184222444	0.0561191	-0.0566709	-0.0542924	-0.0766449	-0.106482
mtRNA granules	-0.131061	0.057731732131253405	-0.0748995	-0.06014	-0.0192921	0.025184213769414498	0.010216341013711718	-0.00609261	0.0232797	0.10197117792395073	-0.0036382	-0.00927445	0.0588545	-0.0085051	0.013852551439727925	-0.0331794	-0.0470642	0.00981202	0.0184657	0.0406923	0.011581161345635069	0.00921837	-0.0233253	-0.0450744	-0.0196717	0.046982343666483406	-0.0596164	-0.041849	-0.000327488	-0.0321778	0.018391422379527435	0.016092463789031727	-0.00895132	-0.0426376	-0.0144137	0.00918205	0.11556695841127597	0.0835483	0.0399793	-0.0687051	0.042936166989620696	-0.00802957	0.00334284	-0.042899	0.0486965	0.0247923	0.0631039	-0.076651	0.044462004595792956
mtRNA metabolism	-0.0847194	0.12413933966083358	-0.0720392	-0.0912063	0.017649739834929748	0.019919827160936487	-0.072701	0.00431944	0.00614486	0.0678208	-0.00507818	-0.03369	0.0341647	0.00307212	0.0418359	-0.00815664	-0.0520239	-0.126878	0.0106306	-0.00684939	-0.0311482	-0.0262837	0.014759935595449181	-0.067886	0.026416548976144306	-0.00181982	-0.0385579	-0.0639706	0.043247190880684204	0.0498834	0.00332928	0.10951162577049295	-0.00845648	-0.0269561	0.00730776	-0.0096208	-0.029526	-0.0335938	0.020853087324235756	-0.0235614	0.00121466	0.0446664	-0.0289035	0.0111607	0.0244444	-0.0373523	-0.0476874	-0.00297446	-0.040146
mtRNA stability and decay	-0.0774888	0.0858464	-0.12205	-0.057005	-0.0430635	-0.0288164	-0.0885891	0.0518139	-0.0630774	0.064323	-0.0349733	-0.0189051	0.0398547	-0.0441225	0.0925527	-0.0275935	-0.0403483	-0.19336	0.00897239	0.00190055	-0.0376289	0.0500636	0.12452333943591327	-0.288734	0.0424515	0.093605	-0.115023	-0.0798679	0.025763514546972167	-0.083171	-0.0049296	0.21177989859360774	0.015953672162126224	0.13468515536266282	0.09906	0.092238	-0.202842	-0.16312	-0.061068	-0.0482828	-0.00843256	-0.0276942	0.13342251089479265	0.0578989	0.042172829796110485	-0.0401098	-0.0564863	-0.0248063	0.0952728
[truncated: 6 more columns]

## Sheet: Fig6B_HC1
Pathway	PC1	PC2	PC3	PC4	PC5	PC6	PC7	PC8	PC9	PC10	PC11
ABC transporters	0.111581	-0.00891082	0.0525467	0.00231732	-0.119929	-0.0542474	0.0775775	0.00900037	-0.0942114	0.140862	-0.0197742
Amidoxime reducing complex	0.108286	0.0736752	-0.0513782	0.0496672	0.0717248	-0.0616848	-0.00614612	0.0241865	0.0534081	-0.00523133	0.0261048
Amino acid metabolism	0.0266187	0.0821124	0.184482	0.0125128	0.00157245	0.120539	-0.0833862	-0.126312	-0.0642521	0.035989	-0.0472211
Apoptosis	0.128555	0.0208025	-0.0398204	0.0302894	-0.0317697	0.004471	-0.03879	0.0358926	-0.0194514	-0.035882	0.00824423
Autophagy	0.124141	-0.0469441	0.00391437	0.0621863	0.0054591	0.0308659	-0.00435725	-0.0472095	-0.000372792	0.00260035	0.0619997
Biotin utilizing proteins	-0.0955248	-0.059836	0.0585417	0.141312	-0.0582107	-0.0519124	0.0824695	0.0238052	0.0068814	0.0297541	0.0421479
Branched-chain amino acid dehydrogenase complex	0.0526908	0.114858	0.00654908	0.0748022	0.0194647	0.132288	0.136657	0.080543	-0.12109	0.00571786	0.0664445
Branched-chain amino acid metabolism	0.0721833	-0.0950164	0.0639389	0.120837	0.0224593	0.0659143	0.109528	-0.0745155	-0.0413252	-0.10587	-0.0132795
CI assembly factors	-0.0957381	0.00802686	-0.0010274	0.173552	0.0318516	0.0753928	0.125192	0.0456245	0.0492622	-0.0286896	-0.0568731
CI subunits	0.0489426	-0.103225	-0.106065	-0.0748636	-0.0550677	0.048005	-0.167964	0.0603337	0.0876604	0.0480785	-0.00965179
CII assembly factors	0.0593457	0.0415035	0.00171591	-0.0844198	0.110199	0.0288685	0.197311	-0.257241	0.104486	-0.0767302	-0.0419226
CII subunits	-0.0989456	-0.0391351	0.0669268	0.0721047	0.144322	0.0217447	-0.103491	-0.0761219	-0.0495347	-0.00392279	0.0719263
CIII assembly factors	0.0844345	-0.030711	0.0733612	-0.170046	0.0236709	-0.0517114	0.0560143	0.173761	0.0136547	-0.0405219	-0.0247884
CIII subunits	0.0342287	-0.154257	0.00194612	-0.0667319	0.0025219	0.0455886	-0.0194634	-0.00147242	-0.0226357	0.00187672	0.0021775
CIV assembly factors	0.101676	-0.00501341	-0.0538744	0.0440567	0.165024	0.105784	0.00223914	0.0498807	0.107616	0.0296654	0.0472612
CIV subunits	-0.0268886	-0.157733	-0.030367	-0.0159464	0.0428861	-0.0239457	0.0192365	-0.0490957	-0.0298138	0.0174959	0.114212
CV assembly factors	0.093414	0.0210279	-0.0507071	0.164977	0.0617077	-0.0978934	0.100743	0.0230282	0.0164193	0.0458591	-0.0152094
CV subunits	-0.0901485	-0.0969944	-0.0832176	-0.0679189	0.0444305	0.0408179	-0.0306729	0.0116481	-0.0671718	-0.0108899	-0.103939
Calcium cycle	-0.0997129	-0.104399	0.0281144	0.0277166	-0.0379693	0.0364158	-0.00711576	0.0299028	-0.00990671	-0.0263226	0.0035584
Calcium homeostasis	-0.111704	-0.063664	0.0143634	0.0484863	-0.106553	0.0549984	-0.0393397	-0.00251469	-0.0202947	0.0102606	0.0196393
Calcium uniporter	-0.0114379	-0.162593	0.0330213	-0.00774796	-0.00657979	0.0231559	-0.000578888	0.000667114	0.0362265	-0.0323675	0.0107727
Carbohydrate metabolism	-0.116551	0.0685646	-0.0319368	0.00665801	0.0205331	0.0424582	-0.0321647	-0.0648085	-0.0529393	-0.0445675	-0.152657
Cardiolipin synthesis	-0.0176225	0.0481359	0.177592	-0.0311213	-0.0618667	-0.190411	-0.163831	-0.0218212	-0.0466206	0.0457119	0.43211
Carnitine shuttle	0.0699412	0.127467	0.0291331	-0.066258	0.0357244	-0.0194831	-0.0823609	0.0313771	0.00115152	-0.0805155	-0.0515455
Carnitine synthesis and transport	0.0749613	0.12339	0.0175048	-0.0634602	0.0303471	-0.023635	-0.0887209	0.0271825	-0.0318637	-0.0839213	0.00586705
Catechol metabolism	0.0236917	0.133508	-0.030274	-0.00794108	-0.0913929	-0.0363218	-0.0908949	-0.140419	-0.117582	-0.128693	-0.106167
Chaperones	-0.121279	0.0280936	0.0455014	0.0700534	0.068487	0.00527236	0.0303355	-0.0455852	0.035885	0.0483305	-0.0471422
Cholesterol, bile acid, steroid synthesis	0.0977999	-0.0654294	0.0936083	0.0185952	0.0409929	-0.124246	0.0244603	0.0663655	-0.00795766	0.131187	-0.00622424
Cholesterol-associated	-0.125639	0.0129874	0.00661221	0.0470513	-0.0507073	-0.0950749	0.0282268	-0.0154903	-0.00362508	-0.0342673	-0.0102288
Choline and betaine metabolism	0.109554	0.0549637	0.0336526	-0.0477431	0.0609874	0.0439284	0.0663712	-0.0169789	-0.150506	0.0902088	0.0638831
Coenzyme A metabolism	0.0110405	0.0496677	-0.111132	-0.179406	0.0775788	0.0291496	0.140511	-0.0714538	-0.187702	0.128909	0.0879944
Coenzyme Q metabolism	0.118494	0.013698	-0.055349	-0.0647061	0.0479103	0.0261699	0.0643584	-0.0471628	0.0609446	0.133576	0.0916834
Complex I	0.0480961	-0.103771	-0.106737	-0.0732434	-0.0550276	0.0492097	-0.167504	0.0612575	0.0887972	0.0480327	0.145246
Complex II	-0.0897839	-0.0307203	0.0718494	0.0544959	0.183208	0.0308595	-0.0579898	-0.149521	-0.0250908	-0.0245664	0.0696891
Complex III	0.0354283	-0.153597	0.00320334	-0.0691649	0.00291289	0.0443393	-0.0183417	0.00155221	-0.0222236	0.00116033	-0.0158012
Complex IV	-0.0260759	-0.157877	-0.0308265	-0.0155971	0.0442615	-0.0230978	0.0192674	-0.0487206	-0.0289546	0.0177497	-0.0424109
Complex V	-0.0896364	-0.0975448	-0.0846427	-0.0662221	0.0456716	0.0398154	-0.029543	0.0120683	-0.0675271	-0.0103489	-0.0843969
Copper metabolism	-0.119839	-0.0608495	0.0227233	0.0458041	-0.0298811	0.0498586	-0.0172322	0.0359827	-0.00366186	-0.0242213	0.0226124
Creatine metabolism	0.0889442	-0.0334537	0.076538	-0.0425783	-0.0726145	-0.182893	0.106539	-0.0322955	-0.0729235	-0.162616	0.0369266
Cristae formation	-0.0493087	0.105304	-0.141721	-0.00345221	0.078141	0.0491559	-0.038965	-0.0848733	-0.0587946	-0.134115	0.110138
Cytochrome C	0.0342763	0.124977	-0.102941	-0.106535	-0.060174	-0.0805071	0.00318114	0.0142016	-0.0523634	-0.0275965	-0.00619835
Cytochromes	0.0348233	-0.153537	0.00181482	-0.0710834	0.000435865	0.0433651	-0.0188133	0.00544448	-0.025069	-0.00464283	0.0203239
Detoxification	0.0724769	-0.0198884	-0.162701	0.0679594	-0.143594	0.0536703	0.00257706	0.053456	0.11187	0.0256903	-0.00541645
EF hand proteins	0.105627	0.0576222	0.105662	0.0319988	-0.0169058	0.049734	-0.0653552	-0.07258	0.0379125	0.06611	-0.0887968
Eicosanoid metabolism	0.0203519	-0.101261	0.0993888	0.0644941	0.0858318	-0.165538	-0.0397944	0.164632	-0.12287	-0.014602	0.0514165
Electron carriers	0.0344392	-0.153381	-2.22569e-05	-0.0730791	0.000441037	0.0424897	-0.0180791	0.00766736	-0.0281542	-0.00416946	0.0733
Fatty acid oxidation	0.103597	-0.0127884	0.135584	0.0249723	0.0843608	-0.000831468	-0.0192412	-0.0734154	-0.0934518	-0.0157584	-0.0782843
Fe-S cluster biosynthesis	0.0727958	0.0855931	0.140076	-0.00497327	0.0227975	0.0503468	-0.0639749	0.125964	0.0535679	0.105536	0.0107161
Fe-S-containing proteins	0.0623908	0.0673755	-0.114698	-0.0339549	0.101127	-0.0425202	0.0601894	-0.100963	0.246042	-0.0885716	-0.0171892
Fission	0.122941	0.0460562	0.0425764	0.00185209	0.0227054	0.071434	-0.0371185	0.0225636	0.022172	-0.0367503	0.0457332
Folate and 1-C metabolism	0.0576675	0.0632905	0.166054	-0.0432268	-0.0367682	0.0976923	-0.161951	0.0587788	0.048233	-0.0203665	0.0692214
Fusion	0.0706667	0.123134	-0.0558954	0.0456863	0.0881238	-0.00948341	0.0250685	0.0580939	0.0108477	-0.0742096	-0.0397607
GABA metabolism	0.0570912	-0.132592	0.0454949	-0.0762279	0.0671269	-0.0400256	-0.0512943	0.0247293	-0.0510878	-0.049154	0.0693262
Gluconeogenesis	-0.114991	0.0600938	0.0692716	0.0658066	2.42909e-05	-0.00496657	-0.0248321	-0.0248536	-0.0370737	-0.000326435	-0.00281092
Glutamate metabolism	0.0446463	0.132634	0.0966618	-0.010691	-0.0708622	0.0634412	-0.0546918	-0.00441629	0.0127295	0.0945548	-0.0348851
Glycerol phosphate shuttle	-0.10899	0.0220378	-0.0449874	-0.102285	-0.105782	-0.019288	-0.0872536	0.0713373	-0.0509392	-0.0264842	-0.0485412
Glycine cleavage system	-0.0599057	0.0931852	-0.0808413	0.00252245	0.161321	0.0347293	0.0270733	0.0509789	-0.157059	0.137566	0.0577002
Glycine metabolism	-0.0787481	0.0826536	0.0568597	-0.0703884	-0.1259	-0.0403147	-0.0861778	-0.0180455	-0.139164	-0.123803	-0.0148803
Glyoxylate metabolism	-0.118099	0.0681419	-0.018641	0.0143097	0.0133024	-0.0561441	0.0192635	-0.0599576	0.0052532	0.0462019	0.0128049
Heme synthesis and processing	0.11421	-0.0193618	0.116727	0.00406443	-0.0424926	0.0705568	0.0321299	-0.019553	-0.0136817	0.0373346	-0.0929338
Heme-containing proteins	0.00925526	-0.162414	-0.01485	-0.00837186	0.0301222	-0.0305231	0.0134605	-0.055838	-0.0179214	0.0012246	0.0121663
Immune response	0.126104	0.0395039	0.0348416	0.0151107	-0.015892	0.0233215	-0.0296161	0.0326258	0.00913273	-0.084843	-0.153691
Import motor	-0.0156467	0.110878	0.0450045	-0.0812156	0.0333293	0.114632	-0.0679773	-0.0280537	-0.243058	0.185009	0.0859608
Intramitochondrial membrane interactions	0.0117501	-0.115081	0.0547309	-0.0906503	0.076496	-0.0573728	0.110842	-0.234614	-0.00811589	0.046746	0.0146108
Iron homeostasis	0.09145	-0.0227492	-0.0469017	0.178887	-0.0973063	0.0124525	-0.0185035	0.0160367	-0.107616	-0.00973829	0.0537729
Itaconate metabolism	-0.0802373	-0.00520325	-0.182435	-0.0249006	0.0254387	0.0835539	-0.0089124	-0.0952699	-0.12449	-0.00508632	-0.0649527
Ketone metabolism	-0.0471472	-0.00588326	0.0970892	0.0316034	0.177921	-0.0541754	-0.242252	0.100893	0.118354	-0.0584999	-0.0942447
Kynurenine metabolism	-0.103091	0.0923138	-0.0522371	-0.0203764	0.041526	-0.0513722	0.0563563	0.0112109	0.0147133	-0.00939206	0.0032666
Lipid metabolism	-0.0845083	0.0919823	0.0552328	0.12381	-0.00870776	-0.0785586	0.0692516	0.0403667	0.024776	-0.0344622	-0.0120582
Lipoate insertion	-0.0443219	-0.107852	0.0724256	-0.0435609	0.047776	0.0653407	0.217214	0.017574	0.0532722	0.125713	0.0424461
Lysine metabolism	-0.083265	-0.0411556	0.0994118	0.0365504	0.13481	0.129752	-0.0244657	-0.133442	-0.089982	0.0964667	-0.00870434
MIA40	-0.0425512	0.00291703	-0.0693429	0.114597	0.0538359	0.262701	0.049932	0.12828	-0.0580168	-0.226028	0.0847969
MICOS complex	-0.0801327	0.103121	-0.110725	0.0134756	0.025342	-0.0183191	-0.00233681	-0.0372949	-0.0315149	-0.144467	0.0314991
Malate-aspartate shuttle	-0.0997103	0.105017	-0.0319878	-0.0280971	0.0181453	-0.0461178	0.00747573	-0.0138938	0.00518125	0.0206216	-0.0209227
Metabolism	0.049996	-0.14111	-0.0451637	0.081729	-0.0353915	-0.0132748	0.00355484	-0.0437757	-0.0524979	-0.00344241	0.0669842
Metals and cofactors	0.0447062	-0.148504	-0.0299684	0.0648402	-0.0125768	-0.0206629	0.00387757	-0.0420871	-0.0576895	-0.00315035	-0.0254931
Mitochondrial central dogma	-0.0938215	0.0835893	0.0846911	-0.101753	-0.0155299	0.0349872	0.0449631	-0.020217	0.0339105	-0.0512679	0.243816
Mitochondrial dynamics and surveillance	0.130071	0.0191865	-0.0294456	0.0338822	-0.00757529	0.0177453	-0.036707	0.0224295	-0.0176692	-0.0304734	0.004083
Mitochondrial permeability transition pore	-0.0450964	0.019116	-0.176672	-0.0232037	-0.191577	0.00872703	-0.0946252	-0.0425731	-0.0934759	0.0517934	-0.0228312
Mitochondrial ribosome	-0.126264	0.0264347	-0.0114714	-0.0654807	0.013238	-0.045957	-0.0193189	-0.0358836	-0.0384775	-0.0504553	-0.00727453
Mitochondrial ribosome assembly	0.0798516	0.0168569	0.16648	-0.117683	0.0204341	0.105867	-0.00337789	-0.00400315	-0.000534265	-0.0287793	0.0109098
Mitophagy	0.126188	-0.0363425	-0.0141613	0.047542	0.00326841	0.0334214	0.00928218	-0.0752416	-0.0027115	-0.0343064	0.0147839
Molybdenum cofactor synthesis and proteins	0.0716381	0.0972599	0.0622798	0.138906	-0.0576139	0.039141	0.0572737	-0.0425788	0.0131926	0.113674	-0.0055722
NAD biosynthesis and metabolism	0.111148	0.0183968	0.045477	0.0848279	-0.0517057	-0.139627	0.00561292	-0.0990395	0.00466623	-0.0326869	-0.0531423
Nucleotide import	0.102637	0.0525306	-0.0428645	0.110856	-0.100887	0.034494	0.0267949	-0.0793599	-0.0474918	0.0770531	-0.00983221
Nucleotide metabolism	0.108284	0.0725751	-0.0926812	-0.00796711	-0.0208983	0.0132763	-0.0243184	-0.0281205	-0.0606044	0.0189577	0.00775135
Nucleotide synthesis and processing	0.10493	0.0729845	-0.102554	-0.0339945	-0.00211265	0.0131843	-0.0372945	-0.0146892	-0.0604897	0.00580832	-0.0261775
OXA	-0.0619352	-0.105734	0.0910922	0.134972	0.013102	0.0300164	0.0150301	-0.00843143	0.0671989	-0.106291	-0.0197737
OXPHOS	-0.0112759	-0.158834	-0.0526179	-0.041822	0.0229745	0.00372122	-0.0295389	-0.0189709	-0.00900783	0.0218292	-0.0684386
OXPHOS assembly factors	0.0898741	0.0259164	-0.0135697	0.0887633	0.194878	0.0549051	0.0722868	0.0537261	0.11609	0.0104104	0.00632589
OXPHOS subunits	-0.0118685	-0.158781	-0.0523663	-0.0421727	0.0217422	0.00335454	-0.0302166	-0.0194642	-0.00991774	0.0220101	0.0178337
Organelle contact sites	0.124464	0.040272	-0.0527134	0.0432248	-0.00116289	0.0230144	-0.0147359	-0.024953	0.0424019	0.000287679	0.000756119
Phospholipid metabolism	-0.0450422	0.146826	0.0463792	0.0495669	0.00627357	0.0184827	0.0202087	0.081732	0.0463023	0.0174827	-0.0103725
Polycistronic mtRNA processing	0.02304	0.145608	-0.0482147	-0.0406776	0.0850252	-0.0438029	0.0919346	0.0157496	-0.0347103	0.0814227	-0.00730687
Preprotein cleavage	-0.0874687	-0.0850054	0.043723	-0.000930424	0.0886167	0.0698909	-0.00489022	-0.124684	0.1745	-0.0355832	-0.128317
Proline metabolism	-0.016456	-0.107999	0.014431	-0.0435357	0.212403	0.072046	-0.11397	-0.0855172	-0.0615408	-0.0212172	-0.112251
Propanoate metabolism	-0.00772376	-0.105011	0.0634161	0.100324	0.141068	-0.149726	-0.0434562	-0.0795034	-0.117555	0.100493	0.078273
Proteases	0.101513	-0.0450016	0.046101	-0.134572	0.0832661	0.0670653	-0.0264614	0.0690397	0.0422697	-0.0278754	0.0607957
Protein homeostasis	-0.104345	0.0125655	0.0991588	0.00929142	0.151641	0.0573478	0.00460432	-0.0312947	0.0613494	0.0514282	-0.0617188
Protein import and sorting	-0.0794295	0.101217	-0.0550276	0.0139003	0.0574587	0.115861	-0.0697606	-0.0803687	0.125962	-0.0182496	0.315107
Protein import, sorting and homeostasis	-0.10706	0.0504916	0.06085	-0.00175226	0.124849	0.0947302	-0.0334487	-0.0248986	0.0452139	0.0532518	-0.00211074
Pyruvate metabolism	0.122392	0.0226616	-0.0163169	-0.0123831	0.049532	0.104783	-0.0512645	0.0194906	-0.0407596	-0.10066	0.00230759
Q-linked reactions, other	0.0103243	-0.11646	-0.0833923	-0.149412	0.000594401	-0.00549015	0.0187531	0.107057	-0.162691	0.0180955	0.0506589
ROS and glutathione metabolism	0.0384501	-0.0599292	-0.163496	0.0486212	-0.181058	0.0612214	-0.0016113	0.0653595	0.108059	0.0468259	0.00389562
Respirasome assembly	0.0312354	0.129509	-0.0787248	0.0989756	0.0842491	-0.023612	-0.10513	-0.0308995	0.00911115	0.0384951	0.0365374
SAM	0.0698109	0.00603234	0.076037	0.0120165	-0.172443	0.069495	0.0857868	-0.198041	0.126146	0.187508	0.0872634
SLC25A family	-0.0535322	-0.0136581	-0.0108746	0.229989	-0.138711	0.103949	-0.000363055	0.0276091	-0.0207484	0.0689827	-0.165064
Selenoproteins	-0.114091	-0.0243556	0.0935035	0.0605649	-0.0107196	0.0618918	-0.0484502	0.0870237	0.0429146	0.0483883	-0.0294471
Serine metabolism	-0.069549	-0.00818077	0.0400213	-0.177958	-0.0990543	0.00355408	-0.0640372	0.0795161	-0.108435	-0.259337	-0.0605896
Sideroflexins	0.0508795	-0.0605621	0.00900052	-0.174013	0.0972372	0.112894	0.124823	0.0754587	-0.0989072	-0.17139	-0.0239236
Signaling	-0.0785235	-0.0462447	-0.0100593	0.138375	-0.162618	0.106185	-0.104811	-0.035543	-0.00401953	-0.0288897	0.138954
Small molecule transport	-0.0380811	-0.0960499	0.0418171	0.153759	-0.0786711	0.132268	0.141924	0.0374622	0.0209503	-0.0688984	0.0724037
Sulfur metabolism	-0.0827413	-0.0026082	-0.0492022	-0.075913	0.0912585	-0.181371	0.137023	0.060308	0.0718539	0.196319	-0.0703093
TCA cycle	-0.126007	0.020206	-0.0351641	0.00271124	0.0164158	0.0318056	-0.0144008	-0.123437	-0.0403029	-0.0141018	0.0208846
TCA-associated	-0.10935	0.086136	-0.0214147	0.0344014	-0.0415823	0.0152523	0.0485598	-0.00525322	-0.0519844	-0.0230869	-0.0371618
TIM22 carrier pathway	-0.0029759	0.0131464	-0.104376	-0.0369944	-0.0369393	0.00478037	-0.267405	-0.215986	0.232422	-0.018951	0.0415266
TIM23 presequence pathway	-0.0957861	0.0462366	-0.0520429	-0.157179	0.0245345	0.0600007	-0.0517605	0.104747	0.0467636	-0.0151751	-0.0921959
TOM	0.0405765	0.140203	-0.083402	0.00237853	0.0227941	0.0391393	-0.0974057	0.0542148	-0.0480598	0.00545957	-0.0912541
Tetrahydrobiopterin synthesis	-0.0903383	0.025627	0.0149567	-0.0745528	0.0850927	-0.0785926	0.179506	0.0887404	0.00238711	-0.23021	0.0685911
Trafficking	0.12271	-0.00160982	0.00817652	0.0225313	0.0706621	-0.0988177	-0.0239328	0.0746184	-0.0718794	0.0323755	-0.0108749
Transcription	0.0600754	-0.0658116	0.0182793	-0.0535077	-0.100918	-0.187929	-0.13798	-0.189948	0.0634024	-0.0960242	-0.167921
Translation	-0.0979207	0.0863377	0.090171	-0.0560653	0.0546328	0.0271262	-0.015044	0.00888266	0.0113055	-0.0504424	0.276873
Translation factors	-0.0684132	0.0609937	-0.0604335	0.0319655	0.214911	-0.0963894	0.0840439	-0.103308	-0.014174	0.0324659	-0.126822
Type II fatty acid synthesis	-0.0945791	-0.0641332	0.081049	0.113472	-0.0661871	-0.0335734	0.102145	-0.00910842	0.044526	0.0144585	0.0011092
Urea cycle	0.113109	0.00224416	-0.0149612	-0.0895003	0.0666504	0.0586923	-0.0772519	-0.0446291	0.155165	0.0114294	0.00678263
Vitamin A metabolism	0.0750166	-0.0160197	-0.100184	0.117188	0.0369109	-0.0354656	0.155876	0.114463	-0.0637314	-0.23921	0.0174513
Vitamin B1 metabolism	0.0436273	0.0439154	0.0604099	-0.123121	0.0461549	-0.267116	-0.100186	-0.105593	0.097409	-0.0234454	-0.0109019
Vitamin B12 metabolism	0.0575408	-5.52372e-05	0.174359	0.0320842	0.0320692	0.0655381	-0.115964	-0.125341	-0.211231	0.0688259	-0.0945474
Vitamin B2 metabolism	-0.0512065	0.0195576	-0.13277	-0.0781777	0.125155	0.177939	-0.0208727	0.125273	0.0256378	0.208641	-0.0841998
Vitamin B6 metabolism	-0.0556341	0.114132	0.063805	0.0621673	0.0420139	-0.122613	0.00919013	0.167212	0.0765233	0.0296642	0.0338215
Vitamin C metabolism	-0.0653791	-0.102161	0.10813	0.0578461	0.0561003	0.0113881	-0.105164	0.102588	0.0701359	-0.0864336	-0.0539555
Vitamin D metabolism	0.0912383	-0.0969067	0.073212	-0.0250236	0.0611521	0.0320412	-0.0518237	0.0941105	0.0646421	0.0179043	0.0114987
Vitamin metabolism	0.0128314	0.0159199	0.231588	0.0459486	-0.0400566	0.0609988	-0.119261	0.111836	0.0266184	0.0284301	-0.169675
Xenobiotic metabolism	0.109762	0.0736731	-0.0726435	0.0568871	0.0114433	-0.00669328	-0.00313125	0.0145733	0.0570295	-0.0215501	-0.0166334
cAMP-PKA signaling	0.0660524	0.0710924	-0.0988698	0.0938519	0.0404715	-0.00201471	-0.00785563	-0.255315	-0.10007	-0.0578159	-0.0056007
fMet processing	0.0907949	-0.00218084	-0.00896708	-0.0935779	-0.0816056	0.227119	0.0682743	0.0387488	0.00430272	0.109017	0.0587925
mt-mRNA modifications	0.110237	0.0159999	0.0780485	-0.0386247	-0.053219	0.047469	0.120015	-0.0765887	-0.110867	-0.0754337	-0.013949
mt-rRNA modifications	-0.0215792	0.0780117	0.158378	-0.0852401	-0.156653	-0.0022962	0.1123	0.010244	-0.0345065	-0.0872245	-0.023685
mt-tRNA modifications	-0.0583892	0.0445377	0.0941739	-0.0775167	-0.0788765	0.115402	0.137208	-0.149954	0.218043	-0.0960246	0.0174342
mt-tRNA synthetases	-0.0699737	0.117677	0.0900291	0.0192819	0.00387594	0.0456761	-0.0605409	0.098767	0.0792122	-0.00925425	0.035474
mtDNA maintenance	-0.106053	0.00799193	0.0204028	-0.134326	-0.12034	0.0351087	0.0464569	-0.0645117	0.00393973	0.0380557	-0.0122913
mtDNA modifications	-0.0706779	-0.0139763	0.0557213	-0.0684781	-0.106075	-0.241891	0.103328	0.0550382	-0.00089515	0.1786	-0.000356477
mtDNA nucleoid	-0.0969139	0.0523849	0.0390671	-0.0858748	-0.0854538	0.138781	-0.0181581	-0.0483078	-0.137887	0.0467188	-0.110764
mtDNA repair	-0.122152	0.0303601	-0.00482212	-0.0381781	-0.10153	-0.0132747	0.0419168	0.0149823	-0.0306228	0.0703672	-0.0217351
mtDNA replication	-0.0961558	-0.0410748	0.0242804	-0.124678	-0.123274	0.0765487	0.0487388	-0.103709	0.0541079	0.0512435	-0.0355519
mtDNA stability and decay	-0.0630721	0.0149216	-0.15564	-0.122304	-0.0395682	-0.0489584	0.024798	0.0934145	0.180936	0.148742	-0.0646321
mtRNA granules	0.0159795	0.0954936	0.167787	-0.115131	0.0293972	0.0410242	0.0713013	0.0859317	-0.0128459	0.081211	-0.179633
mtRNA metabolism	0.0393817	0.0713093	0.144894	-0.0995764	-0.0767717	0.0400314	0.165952	-0.0708013	0.112831	-0.0986216	-0.0159751
mtRNA stability and decay	0.0803789	-0.0143116	0.0580682	-0.17878	-0.0396906	0.101105	0.125559	-0.0193416	0.111375	-0.0736339	0.0113025

## Sheet: Fig6B_HC2
Pathway	PC1	PC2	PC3	PC4	PC5	PC6	PC7	PC8	PC9	PC10	PC11
ABC transporters	0.0760215	0.1055666180270625	-0.0673764	0.1263417890458239	0.0211994	0.0505251	-0.0917293	0.050509464647003656	0.0321316	-0.00412455	-0.049761
Amidoxime reducing complex	0.11199133301987432	-0.0599097	-0.0294994	0.027486434532973773	0.00366894	0.019619102683549897	-0.0281803	0.00562384	-0.0235289	-0.00641171	-0.0498966
Amino acid metabolism	0.0981064	-0.108406	-0.0107458	0.0297346	0.00573623	0.0322288	0.0326066	-0.0271936	0.0365974	-0.0200829	-0.0807743
Apoptosis	0.10278333062465257	-0.0435883	0.040811707021119914	0.046671217052706694	0.0914261	0.0910756	-0.0292379	0.0631937	0.0997412	0.0555624	-0.0366569
Autophagy	0.11660006434882463	-0.0143216	0.026212622303599206	0.0064467	0.00174265	0.00209454	-0.0114865	-0.0662669	0.0463783	0.018407118534559137	-0.059143
Biotin utilizing proteins	-0.102604	0.0601136	0.0784341	0.0380757	0.0750247	0.0446431	-0.0200495	0.011970195771925183	-0.0525495	0.0039438	0.036371691015649146
Branched-chain amino acid dehydrogenase complex	0.0880241	-0.0749423	0.0843313	-0.000781174	0.0433497	0.0592402	0.14591931693894328	0.00460119	-0.138319	-0.0527563	0.1191541614582827
Branched-chain amino acid metabolism	0.0597283	-0.0701528	0.17841251200364408	-0.000505767	-0.00860431	-0.078927	0.1105978182436816	-0.0777276	-0.0210156	0.031760928653102864	-0.0845939
CI assembly factors	-0.0656835	-0.0780683	-0.0222601	0.1613609395583895	0.0873736	0.12086073202869671	0.10417098183530274	-0.126024	-0.0117121	0.029998695459451254	-0.0873624
CI subunits	0.090687639196115985	0.021952325259374524	-0.101361	-0.140068	-0.000791659	0.030453022448998997	0.0370843	0.0693526	-0.0174545	0.0279218	0.018176269817108064
CII assembly factors	0.0779973	0.075271	0.016167989743085226	-0.0623953	0.039581256271755245	-0.0679275	-0.220693	-0.0777675	0.15861460108988154	0.0391948	-0.077017
CII subunits	-0.0414603	-0.168201	0.029577586614758917	-0.00108691	-0.0468638	0.0614441	0.1145757699603195	-0.0634706	0.11063077937529163	-0.0363518	0.00428151
CIII assembly factors	-0.0797457	0.022840314995597775	-0.108467	-0.0895016	-0.126281	-0.105015	0.10541078079277467	-0.0846645	-0.0517256	0.0643136	-0.00706487
CIII subunits	0.0795409	0.0865048	-0.112922	-0.120832	-0.0108794	0.026420464176540665	0.0138496	-0.011574	0.010378926798950278	-0.0404123	0.10021764689371199
CIV assembly factors	0.0513562	0.027277767680288025	-0.0997287	0.20074770117362314	0.063013	-0.0899708	-0.0165363	-0.0158836	0.013184302229985833	0.2166539931518671	-0.0296698
CIV subunits	0.11214515829471526	0.00714585	-0.0210899	-0.089037	-0.0374959	0.0229344	0.0367765	0.017912850410003154	0.00969715	0.032514549694069944	0.0752658
CV assembly factors	-0.000287391	0.0365143	0.1155906622414167	0.1169817914671243	0.0562188	-0.145978	-0.0771763	0.19229724518664246	0.2814772414721107	0.0834448	-0.0226755
CV subunits	0.052581910129770884	0.0256894	-0.113837	-0.219364	0.023806636079033612	-0.026323	0.0444239	0.0976589	-0.0061567	0.041984	0.0785263
Calcium cycle	-0.0640763	0.0659982	0.15942540655153944	-0.0878775	-0.0697305	0.0409205	0.10198213301782935	-0.00421687	0.0942601	-0.0103554	-0.0409255
Calcium homeostasis	-0.0759638	0.051571	0.14740308492808238	-0.0649495	0.11676103695528967	0.025767730916207172	0.024811827591505995	0.098628	0.020290221568774684	-0.00883848	8.59836365744519e-4
Calcium uniporter	0.00945362	0.041681214364676256	0.2098786802615363	-0.102715	-0.0893595	-0.036273	0.0768043	-0.0438667	0.0979864	-0.0759234	-0.0524709
Carbohydrate metabolism	-0.106191	-0.0871369	0.014613662539443979	-0.0149882	0.00636401	0.0331738	-0.00261296	0.036599395129105025	-0.00957211	-0.0124294	0.10463255249738788
Cardiolipin synthesis	-0.0710855	-0.106048	0.00647924	-0.0822947	-0.03375	-0.176589	0.027728383041591444	-0.145029	0.0539107	-0.0499926	-0.0309975
Carnitine shuttle	0.056642099181129266	-0.131893	-0.132078	0.021535299987179034	0.0267295	-0.0444335	0.056826200303320376	0.0305676	-0.0106234	-0.0951042	-0.0233477
Carnitine synthesis and transport	0.0515103	-0.136101	-0.129234	0.0352405	0.030254229531496243	-0.0358164	0.0591203	0.0225922	-0.00653558	-0.123169	-0.028565
Catechol metabolism	0.0968972	-0.0504378	-0.0083795	-0.034025	0.040132305315488385	0.0518356	0.21830972198194093	0.00876061	-0.0426137	-0.011945	-0.00555825
Chaperones	-0.0109101	-0.154076	0.096672	-0.0920855	0.037417	-0.101317	-0.0486532	-0.102822	-0.0801069	0.0753846	0.1618916334609422
Cholesterol, bile acid, steroid synthesis	0.060737046254142335	-0.131312	0.0686547	0.0957831	0.12216206331265499	0.0389237	-0.0588361	0.056607848781701345	-0.0183048	0.019730190750670822	-0.0545303
Cholesterol-associated	-0.10484	-0.00178486	0.084001	0.0341868	0.0700975	0.0948667	0.0545427	-0.000792313	0.0555623	-0.0167665	-0.0128795
Choline and betaine metabolism	0.1028111647744605	-0.00927239	-0.0673761	0.0993016	-0.0972355	0.029303265359376874	0.020583869776059926	-0.0134088	0.0518208	-0.0201385	0.078263
Coenzyme A metabolism	-0.0590711	-0.0623275	-0.106121	0.15124013621817145	0.0289407	0.00733864	-0.0609315	0.13450021863222805	-0.145439	-0.142927	0.0122471
Coenzyme Q metabolism	0.0561347	0.024672168751986804	-0.119994	-0.0701541	0.0735451	0.018695126171767062	-0.257051	-0.0383991	0.19138885890728446	0.013188774750676154	0.054256
Complex I	0.0906472	0.0214602	-0.102059	-0.13954	-0.000117457	0.031548930760481604	0.0380849	0.0687334	-0.0176348	0.028297933403783608	-0.0326273
Complex II	-0.0321132	-0.171535	0.0351979	-0.0118701	-0.0446028	0.0557454	0.0878594	-0.0828995	0.14845094972416095	-0.0331491	0.016050626383571354
Complex III	0.07866	0.0868678	-0.114345	-0.122034	-0.0124136	0.025179805436691304	0.015135557320925008	-0.0126068	0.00976613	-0.0396781	-0.0126389
Complex IV	0.11222158160672825	0.00722629	-0.0213877	-0.0883383	-0.0372693	0.022634296871770293	0.0366967	0.017849524243616476	0.00973151	0.0331704	-0.116738
Complex V	0.052867	0.026405201725854796	-0.112647	-0.218733	0.024821924280349097	-0.0287636	0.0434549	0.10122097798404245	-0.00176451	0.043527950363985726	0.0361803
Copper metabolism	-0.0789848	0.0665536	0.11775215124803545	-0.0663306	-0.0577459	0.0752512	0.1443617797845851	-0.0194561	0.098088	-0.00395858	-0.0217633
Creatine metabolism	0.0284612	0.0643987	-0.0142437	0.15667141031377554	-0.181423	-0.210901	0.00829321	0.10155521920593966	-0.0875742	-0.134552	-0.0165247
Cristae formation	-0.103835	-0.0418643	-0.0469394	-0.107243	0.00928322	0.00324425	-0.0502083	0.014406100647844528	0.022292953891970665	0.0939158	0.00190049
Cytochrome C	-0.0550925	-0.141473	-0.0853358	0.0451398	-0.0444936	0.0610924	-0.0542992	0.10659319932683309	0.10677600606478563	0.0717979	-0.0830942
Cytochromes	0.0764197	0.0901895	-0.115524	-0.123814	-0.0112869	0.028721037770272455	0.011812613604017768	-0.00845295	0.013823731330412667	-0.0415621	0.0606488
Detoxification	0.11244304744186095	0.0413603	0.034297600159349545	0.022280869624280913	-0.00802474	0.0530197	-0.0241399	-0.0661548	-0.0108861	0.0487545	-0.023859
EF hand proteins	0.082549	-0.0339645	0.0152056	0.036769308982795595	0.23233707351226793	0.0554292	-0.0407015	0.13912591079569345	-0.0418362	-0.0519526	0.056099
Eicosanoid metabolism	0.00276049	-0.120051	0.0712068	0.0903835	0.17631938033772263	0.00506372	0.1819107272034301	0.10522317744779444	0.1238965811689141	-0.0594373	-0.0888017
Electron carriers	0.0761551	0.0906492	-0.11604	-0.123548	-0.0153945	0.026595852495428524	0.013017	-0.00713591	0.014855312968723848	-0.0387846	0.0676805
Fatty acid oxidation	0.0580476	-0.14697	-0.0284699	0.0463289	-0.0491746	-0.157456	0.0364908	-0.00119164	0.019793700597405085	-0.109358	-0.0728073
Fe-S cluster biosynthesis	0.081598	0.12483417855493777	-0.0469182	0.020748720165888197	0.0708631	-0.0508905	0.00977132	-0.04923	0.11532406452275139	-0.0383892	0.0574248
Fe-S-containing proteins	0.0791696	0.00357366	-0.103866	0.17552726699456897	0.027453859606496697	0.0159724	0.00589185	0.0765386	0.0223922	0.0884526	0.19139326573784862
Fission	0.11068318449568613	0.0488787	-0.0229581	0.00767077	-0.0261164	0.0669479	-0.0529308	0.0203295	0.016347257395879323	0.0968607	-0.00931414
Folate and 1-C metabolism	0.0628131	0.15408814072102484	-0.0494915	-0.0176197	0.0637573	0.00785219	0.024618492174778215	-0.0807088	0.0825673	0.050726241244258244	0.014701029386960374
Fusion	0.045907081695300306	-0.153871	-0.0238691	-0.0739566	-0.0327206	-0.0999012	0.0403701	0.1500138926300178	0.0790762	0.0168607	0.058928647741762596
GABA metabolism	-0.0643321	-0.027472	0.14868157203962062	-0.055005	-0.0238852	-0.0234879	-0.168409	-0.0917449	-0.19635	0.027005428810740424	0.0819828
Gluconeogenesis	-0.0993541	0.027176457087676055	0.10413308906676527	-0.0861482	0.00508957	-0.0440547	0.00766704	-0.0566245	-0.0479839	0.040553459239442646	-0.098035
Glutamate metabolism	0.10257690405269446	-0.0904195	-0.0391443	0.0424289	-0.0111512	0.0317619	0.00502101	0.0014396	0.0404474	-0.0283149	-0.0236085
Glycerol phosphate shuttle	-0.11592	-0.0154923	-0.00739792	-0.0174345	-0.0595866	-0.0505531	0.023663974341838773	0.0371411	-0.0158169	-0.00514792	0.030492041773382363
Glycine cleavage system	-0.0606529	-0.110939	-0.0444885	-0.117656	-0.026491	0.18351782321865495	-0.0931476	-0.0276854	0.0757356	0.0493051	-0.048025
Glycine metabolism	-0.0343791	0.1152393550581021	-0.132243	0.0906157	-0.0244889	0.17107827304737522	0.029612686545631504	-0.0653654	0.0747477	-0.0853995	0.0820337
Glyoxylate metabolism	-0.0842689	-0.124549	-0.047374	-0.0226339	0.0541377	0.050853994617230794	-0.0140732	0.0918991	-0.0152351	0.00396492	-0.0627119
Heme synthesis and processing	0.0598078	0.0550952	-0.0496935	0.16282160426503883	-0.0345446	-0.215496	-0.00549768	-0.00878029	-0.064402	0.16827760058144436	-0.108657
Heme-containing proteins	0.11366725738497714	0.029210803295419027	-0.0271982	-0.0665877	-0.0267612	0.026431634689991938	0.018008040734049116	0.00193923	0.00824137	0.0264377	0.023145447882106887
Immune response	0.0737248	-0.0734736	0.029189346987102696	-0.00499113	0.14001242938078404	-0.0733312	0.21812600302808707	-0.125566	-0.0421001	-0.0386228	0.052368486946112604
Import motor	-0.083254	0.049789763150269124	-0.0783812	-0.00294951	-0.0767336	-0.0804552	0.0606169	-0.223302	0.0778713	0.0661864	0.0639107
Intramitochondrial membrane interactions	-0.0954267	-0.0321261	0.013146163066454155	0.0922774	-0.121394	0.11750999193458328	-0.100889	0.019738774460913485	-0.0517931	-0.066046	0.0698587
Iron homeostasis	0.11503971752372986	0.020550719953816663	0.0515782	0.00469249	0.040962161300340964	0.013485077785934912	-0.00649213	-0.0265927	-0.0134841	0.028578984769016363	-0.00646998
Itaconate metabolism	-0.108355	-0.0176759	0.027969908653904436	0.022414465331154886	-0.0890341	0.0420478	0.0977386	0.00818299	0.10734245470496422	0.045845179753558396	0.053303322662030264
Ketone metabolism	0.0140062	-0.122955	0.050196508099003896	0.0875031	-0.0859789	0.268215	-0.0479795	0.016590804097615704	-0.0954153	0.0755147	-0.0786196
Kynurenine metabolism	-0.10497	-0.0746933	-0.0402412	-0.0323005	-0.00725139	0.0609779	0.0695968	0.0377176	0.00163887	0.00683756	0.00333092
Lipid metabolism	-0.0675013	-0.105962	0.11040289586314568	0.0613807	0.11028806594351812	0.0996941	0.0315247	0.011440559659366719	0.076508	-0.0663617	0.010907057106812593
Lipoate insertion	-0.0843393	-0.0110969	-0.0700545	0.0952392	-0.0120357	-0.160315	0.11949287135390482	-0.143935	0.0016037	0.0812824	-0.0646948
Lysine metabolism	-0.0946011	-0.0428561	0.011546211842086049	0.11015046860414449	-0.113195	-0.0504668	-0.0489897	0.016131655169734135	0.13789960338642118	0.0903623	0.023341281470297612
MIA40	-0.0936031	-0.0134874	-0.0923093	0.066849	-0.0101107	-0.0755297	-0.112801	-0.143373	-0.00497841	-0.0560567	0.0503709
MICOS complex	-0.105957	-0.0111145	-0.0811573	-0.064723	0.023181936603703792	0.0233866	-0.0289997	-0.0533765	-0.0861279	0.0656191	0.0678042
Malate-aspartate shuttle	-0.103225	-0.0774273	-0.0351734	-0.0666245	-0.0427806	0.0173236	0.014065740772418352	0.052040018374494644	-0.0261929	0.045419423817247014	-0.0125032
Metabolism	0.11730619352468336	0.0226556	0.013582281134329882	-0.0284107	0.011813411221142758	0.0304847	0.00713577	-0.0158331	0.0025124	0.027513698664181754	0.0960766
Metals and cofactors	0.1171236826106725	0.026571919874757294	0.00675388	-0.0348299	0.00366626	0.021126015713266333	0.00774153	-0.0109489	-0.000648646	0.027275	-0.015686
Mitochondrial central dogma	-0.112689	0.0395418	-0.0461347	-0.000103843	0.0644414	6.099612901525137e-4	-0.0140681	-0.0158222	-0.030943	0.0375853	0.00512873
Mitochondrial dynamics and surveillance	0.11499260616989744	-0.0265066	0.00992003	0.0236325	0.0431955	0.0464207	-0.0296383	0.022419889314448792	0.0636184	0.0348062	0.0293141
Mitochondrial permeability transition pore	-0.102334	0.023826084704369282	0.0734001	-0.0257311	0.1289043554691343	-0.0393263	-0.057369	0.0644819	-0.0426814	0.029194354656442937	0.0538558
Mitochondrial ribosome	-0.116278	-0.00977281	-0.0318389	-0.000449622	0.026124	0.025679557256480152	-0.00333199	-0.0497435	-0.0575721	0.0280299	-0.126148
Mitochondrial ribosome assembly	-0.0422717	0.0800614	-0.130043	-0.11457	-0.0292423	0.00420692	-0.226076	0.0357719	0.0848567	-0.0896538	0.0395253
Mitophagy	0.11242083147468421	-0.0540597	0.017446842565711336	0.014612037881261013	0.020403	-0.00200154	-0.035154	-0.0525504	0.056871979899391266	0.0153215	-0.0225285
Molybdenum cofactor synthesis and proteins	-0.00600117	0.12059872648947946	-0.105739	0.12112736241925152	-0.0603778	0.0856959	0.0972948	-0.071955	-0.131295	-0.19881	0.00489508
NAD biosynthesis and metabolism	0.10074413175635263	0.0761305	0.0321409	0.0650962	0.0898452	-0.00295753	-0.044363	-0.0385574	-0.059579	-0.0197533	-0.0327809
Nucleotide import	-0.041415	0.13777712885616616	0.0956365	-0.00670697	0.18702734128602003	0.014170834375046749	-0.0460042	0.0660608	-0.0312168	0.028265414898035465	0.00573147
Nucleotide metabolism	-0.0487958	-0.0563586	-0.086652	0.017242501268516022	0.2984821919649412	-0.0807888	-0.0445723	0.0551241	0.00518152	-0.0242022	0.0687547
Nucleotide synthesis and processing	-0.0220857	-0.133701	-0.139674	0.011100526010718658	0.16424985927523653	-0.0775079	-0.0109001	0.016599242794263558	0.0167661	-0.0360357	0.1521158252780638
OXA	-0.0309816	0.1640198099486375	0.0972202	-0.0400959	0.0240808	0.00622246	0.0948702	-0.0919249	-0.0189492	-0.0501261	-0.0263038
OXPHOS	0.10226728433592716	0.020246692588138743	-0.0674313	-0.122422	-0.0187323	0.024931956229204664	0.037517822614128976	0.040824385689207904	-0.000943919	0.027106512101666917	0.067706
OXPHOS assembly factors	0.027326896231348038	-0.0591693	-0.0537805	0.23447155825689256	0.0822282	0.00697562	0.0678919	-0.10097	0.0482542	0.1881061307464386	0.28638033109514677
OXPHOS subunits	0.10220563121140017	0.020392613601579988	-0.0670323	-0.12304	-0.0190621	0.024844268419082948	0.037213499334837766	0.0410929	-0.00103157	0.0264186	-0.0764798
Organelle contact sites	0.1144347968125665	-0.0135311	-0.0516418	0.012342259837564436	0.028951	-0.0535901	-0.0360953	-0.0123337	0.00374813	-0.0403136	-0.0980314
Phospholipid metabolism	0.0520127	-0.135577	0.0472652	-0.0644367	0.0339511	-0.119414	-0.086953	-0.0247494	0.21051052988652685	-0.0490251	0.0576995
Polycistronic mtRNA processing	-0.0749331	-0.0648919	-0.106822	0.00239247	0.0102147	0.0926442	-0.120709	-0.203388	0.038167827322801516	0.045954665216539826	0.030426383880225328
Preprotein cleavage	-0.109066	-0.00866866	0.0644939	-0.00564628	0.0548578	0.053599	-0.0500474	-0.00570545	-0.0314363	0.12844450833032667	-0.0805049
Proline metabolism	0.050335608146682795	-0.139323	0.0298307	-0.140578	0.0661017	-0.0283415	-0.0453857	-0.0946367	-0.0865947	0.0311243	-0.0361943
Propanoate metabolism	-0.0628785	0.0430338	0.1630222234308312	0.013768837529487323	-0.14767	-0.0991511	-0.0561923	0.039912654331895316	0.0899521	-0.072262	-0.00432451
Proteases	0.10819718022299842	-0.0238815	-0.0720716	0.03744	0.016833764967935306	0.00972186	0.0787896	-0.0391601	0.082054	-0.0442775	0.2592554027395434
Protein homeostasis	0.0282371	-0.164361	0.0586783	-0.0666334	0.0345679	-0.0980893	-0.0103698	-0.140558	-0.0388534	0.0648694	0.2066887860477317
Protein import and sorting	-0.116129	-0.0147432	-0.0432119	-0.00398871	0.038038604765201614	-0.0181877	-0.0107976	-0.01757	0.0206794	-0.0360632	0.34671220633538774
Protein import, sorting and homeostasis	-0.0493216	-0.15305	0.011461978688325885	-0.0814318	0.0400141	-0.115006	-0.013489	-0.138177	-0.0152965	0.010376902151976687	-0.160118
Pyruvate metabolism	0.0292504	-0.158482	-0.0468871	-0.021148	0.13351717343517502	0.015245639151920428	0.037791188507254235	0.079051	0.00117088	-0.207232	-0.0301169
Q-linked reactions, other	-0.0463786	-0.00265124	0.00825794	0.0641169	-0.273007	-0.154053	0.0767707	0.0920355	0.0643013	0.20308263553930062	0.22592448437757623
ROS and glutathione metabolism	0.10502256752612589	0.071329	0.0466354	0.024641	-0.00917138	0.045074985539792424	-0.022691	-0.0849751	-0.00546768	0.060098814801192044	-0.00627723
Respirasome assembly	0.10396725951723725	-0.0931499	0.00911356	-0.0010805	-0.047838	-0.00922014	0.00483822	0.0400765	-0.0137393	8.920907480447958e-4	0.033653588428123646
SAM	0.0681395	-0.0245207	0.1130136902046501	0.0708296	0.0794214	0.016982320894688104	-0.104721	-0.188924	0.0587657	-0.214176	0.082707
SLC25A family	-0.0533295	0.11655144225125479	0.12027422513119984	0.025806890228020993	0.0716683	0.059264	0.11775888748735128	0.14860510280443215	-0.00557393	0.0384291	0.18173553003519272
Selenoproteins	0.10463676406319128	-0.0762663	-0.00400565	0.0657231	-0.0118012	0.00126518	0.00589724	-0.0878879	-0.0265335	-0.000643577	-0.0188935
Serine metabolism	-0.0878006	0.0617549	-0.089538	0.014221505385107438	0.0286009	0.1608268617339172	0.0724171	-0.0397281	0.13143371877666848	-0.0395043	0.019181284289833248
Sideroflexins	-0.0992897	-0.0434007	-0.0514867	-0.0529333	-0.0011913	0.0717326	0.0994909	0.012933850173226886	0.18551623854354624	0.027519772927981242	0.014682082586614747
Signaling	-0.0229	0.0354987	0.160922	-0.0744576	0.22173688271062575	0.00221116	0.10709696987062726	0.12611043523606713	0.0599164	-0.0493606	0.13711161881814973
Small molecule transport	-0.0175392	0.10278946728820883	0.1635618869057959	-0.0228098	0.0675693	0.0530837	0.0907276	0.19036791913024925	0.0776645	0.0731821	-0.0392528
Sulfur metabolism	-0.0189182	-0.142247	-0.0953716	-0.0243993	-0.0205393	0.20139758361102048	0.0868116	-0.01029	-0.0695872	0.1325117343657583	0.023490523602422698
TCA cycle	-0.106525	-0.079757	-0.0112355	-0.0356955	-0.0207927	-0.00182454	0.010156321236093037	0.0740043	-0.000823296	0.00412007	-0.028743
TCA-associated	-0.105984	-0.0608087	0.0720014	-0.00530321	0.0415232	0.0528562	-0.0359601	-0.0313892	-0.00673048	-0.00970657	0.0757675
TIM22 carrier pathway	-0.0519415	-0.0451259	0.053974070374536644	-0.051854	-0.117268	-0.0671929	-0.279864	0.16408075436495326	0.026824480974418155	-0.14818	0.0453122
TIM23 presequence pathway	-0.0785078	-0.100093	-0.118162	0.030720126258639072	-0.0341557	-0.0845973	0.0528258	0.0697175	-0.00596773	0.0442129	0.023080484885538915
TOM	-0.0846608	0.005239	-0.10411	-0.115772	0.12973544092769201	0.0041274	0.012413233100440116	0.0658157	0.0296904	-0.131153	-0.0920142
Tetrahydrobiopterin synthesis	0.0759727	-0.0293091	0.028523761173506468	0.00208988	0.0539887	0.13369512816273707	-0.286759	-0.0780987	-0.0694294	0.024811319544710237	0.00375274
Trafficking	0.11526318757548068	-0.0219268	0.017642558043196612	0.05364	0.0293314	0.0339726	-0.0112448	0.0210469	-0.0303409	0.026467782255421117	-0.00824827
Transcription	-0.100366	0.0313794	-0.053294	0.00819427	0.057401	-0.12257	0.016156894436818656	-0.145233	0.0465548	0.0731027	-0.0173044
Translation	-0.110271	0.024282289190923633	-0.0268397	-0.0228758	0.0951999	-0.0147042	-0.0404042	-0.0472325	-0.082854	0.0721649	0.0948146
Translation factors	-0.0722354	-0.0400178	0.00503599	0.2041247870513088	0.040112	0.020817	-0.0653077	0.12208044707996414	-0.112553	-0.0125479	0.00641467
Type II fatty acid synthesis	-0.107849	0.048750221534425126	0.0509882	0.0547945	0.0708839	0.0338955	-0.0292018	-0.0205726	-0.0431491	0.010538132047527722	-0.0270493
Urea cycle	0.029064422815919616	0.14683209184834958	-0.0819255	-0.0145069	0.13145492417020388	-0.108922	0.10472090150030433	0.0932371	-0.0254956	-0.0938224	-0.0119951
Vitamin A metabolism	-0.0203917	-0.0277158	0.11242949071163205	-0.170485	-0.0302475	-0.0165624	-0.186631	0.18402625862641306	0.024578355868012363	0.18923379893916623	0.1041958603544551
Vitamin B1 metabolism	0.0727128	0.0948428	0.0894103	0.0730598	-0.10868	0.0529093	-0.0218864	0.00942028	-0.194037	-0.0492325	0.015707138502544585
Vitamin B12 metabolism	0.048741037022004954	0.0578105	0.0897856	0.14215134613988484	0.035451417423053806	0.1609180438628782	-0.0747604	-0.0884279	0.24702402738443738	-0.00888602	0.033832497355567606
Vitamin B2 metabolism	-0.082314	-0.0194199	0.00237683	-0.169915	0.11958453587076917	0.0926871	0.029325	-0.104759	-0.0482683	-0.0337224	-0.0305293
Vitamin B6 metabolism	-0.0194752	-0.0731902	-0.117208	0.0395431	0.10084105851469462	0.00204433	0.019039965533888103	0.1464674470925798	-0.0995	0.3783304429999088	-0.160888
Vitamin C metabolism	-0.0744478	0.10105107249605243	-0.00404539	-0.032356	0.0903076	0.00280557	0.024203701777771452	-0.118079	-0.259106	-0.0563594	0.029898796054452417
Vitamin D metabolism	0.0839857	0.0515008	0.13233914207791084	0.0830737	0.0503577	-0.042197	-0.0688216	-0.0759706	-0.0532967	0.0356166	-0.0220391
Vitamin metabolism	0.010943212012096637	0.1842254771335019	0.00534215	0.029345018774969256	0.10859445449076711	0.0490154	-0.00509459	-0.0701564	0.0460633	0.0775819	-0.0277338
Xenobiotic metabolism	0.10951749186156465	-0.0626816	-0.0428723	0.0241844	-0.00468456	0.0627206	8.509843895813948e-4	0.018007474118801593	-0.0253391	-0.00475817	0.0278448
cAMP-PKA signaling	-0.0197945	0.0167462	-0.168903	0.0766728	0.1294619350281869	-0.210771	-0.0799117	0.11921609712227599	-0.030337	-0.0572244	-0.117304
fMet processing	-0.0156211	0.0882755	0.030897397463869478	0.0215084	0.18372322243186884	-0.249753	0.0182147	-0.128475	0.20375954171987193	-0.0567487	-0.0242635
mt-mRNA modifications	-0.0323535	0.16936575653755617	-0.048974	0.0669944	-0.0216945	0.0706403	0.0808257	0.0395583	-0.0279358	0.13749807266768663	0.12451352116709559
mt-rRNA modifications	-0.0888853	0.0859416	-0.0697531	0.023035479206196117	-0.0406104	-0.0192	0.1194984690338595	0.1078660388380638	0.10443915626744799	0.050527997773867586	-0.115976
mt-tRNA modifications	-0.081544	0.074093	-0.135247	0.027463923903015514	0.0799145	0.010955208800071631	0.0780832	0.00221233	0.0893649	0.0330914	-0.0546338
mt-tRNA synthetases	0.0500343	0.0344876	0.0440711	-0.102641	0.2196008801042366	-0.103081	0.00146821	-0.117779	-0.121586	0.24593960705567397	-0.0182812
mtDNA maintenance	-0.117135	0.020025	-0.0280352	0.014223323133499971	0.021749187609626262	-0.0128799	-0.0334501	0.020467546427528124	-0.0146898	-0.00485892	0.00394906
mtDNA modifications	-0.0681338	0.14543170949208012	-0.0528863	0.0424134	-0.0105033	-0.0174249	-0.011334	0.0628398	-0.0832607	-0.117889	0.025157583721820285
mtDNA nucleoid	-0.118023	0.0116799	-0.0159185	0.020019754498600432	0.020453005706609878	-0.0202817	-0.020452	-0.00338836	0.0285418	-0.0156516	0.016053317468619516
mtDNA repair	-0.114683	0.026702686509090152	-0.0174908	-0.0213094	0.037632618269139606	-0.0153659	-0.0134331	0.0660031	-0.0676017	-0.0316384	0.019531367382277783
mtDNA replication	-0.115823	0.0279262	-0.0340358	0.0167912	0.0404238	-0.0120955	-0.0278867	-0.0197437	-0.0119879	0.00356888	0.028845769136406685
mtDNA stability and decay	-0.107614	0.00220214	-0.0664195	0.0267776	0.029557050068557456	-0.00570208	-0.0248263	0.019880605031601828	-0.0145223	-0.185744	0.00164939
mtRNA granules	-0.0922626	0.0332635	-0.128395	-0.0313742	0.018299806809294075	0.049673870420346454	-0.0888254	-0.100805	0.0326968	0.00200354	-0.0027834
mtRNA metabolism	-0.0934176	0.0894936	-0.0949276	0.019092446602651376	0.030824414660577178	0.014516460832112364	0.0184552	-0.0471932	0.083627	0.00426716	-0.140028
mtRNA stability and decay	-0.0729962	0.00816148	-0.131884	0.007825	0.029529099672285126	0.20195647045787807	-0.0399085	-0.0917637	0.15341423790558226	0.042964939984436526	-0.120638

## Sheet: Fig6B_HC3
Pathway	PC1	PC2	PC3	PC4	PC5	PC6	PC7
ABC transporters	-0.0403275	-0.055997	-0.184987	0.0252633	-0.0695764	0.00484184	-0.160795
Amidoxime reducing complex	0.0256262	-0.0228157	0.18246	-0.0681911	0.0311597	0.167398	-0.035184
Amino acid metabolism	-0.0304902	-0.0776322	0.175593	0.0620828	-0.0571683	0.0141082	-0.0198027
Apoptosis	0.0762655	-0.094903	-0.0471182	-0.00248065	0.17149	-0.00455048	-0.0264916
Autophagy	0.0933747	-0.0998057	0.0436752	0.0347678	0.000563037	0.0115943	-0.0602477
Biotin utilizing proteins	-0.080207	-0.0374749	-0.145916	0.0714848	0.0044703	-0.0189006	-0.0123652
Branched-chain amino acid dehydrogenase complex	0.0992293	0.0715633	-0.00255742	0.0986197	-0.0574283	-0.0605987	0.0829668
Branched-chain amino acid metabolism	0.101642	0.0536878	-0.0447136	0.119228	0.0282615	0.00851982	-0.118051
CI assembly factors	0.0380452	0.130272	-0.0747145	0.0630109	0.101287	-0.105729	0.0743776
CI subunits	0.0927297	0.0985201	-0.0271396	-0.0604975	-0.0466422	-0.0149735	0.0125151
CII assembly factors	-0.0316932	0.0663946	0.0867273	-0.209433	0.0497525	0.165553	-0.139682
CII subunits	-0.109091	0.0337562	-0.0696648	-0.00061011	0.00859383	0.0784253	-0.0618579
CIII assembly factors	-0.0635039	0.102929	-0.0655234	0.0562629	-0.0772957	0.173407	0.0171882
CIII subunits	0.109605	0.06396	0.0152014	-0.0335961	-0.0395297	0.0210362	0.0162095
CIV assembly factors	-0.0230904	0.0854031	0.0543245	0.159111	0.060177	-0.246585	-0.210624
CIV subunits	0.106715	0.0645096	0.0448586	-0.0477423	-0.0245651	-0.0160038	0.0401308
CV assembly factors	0.104295	-0.00371523	-0.094663	-0.00666362	0.0714401	0.0538548	0.0512697
CV subunits	0.0458768	0.144019	0.00638983	-0.112912	-0.0258348	-0.0170747	0.0168101
Calcium cycle	-0.0859533	-0.117409	-0.0102842	8.00416e-05	-0.0085216	-0.038696	-0.0430405
Calcium homeostasis	-0.0734987	-0.11683	-0.0689895	-0.0537667	-0.0213728	-0.0562683	-0.118967
Calcium uniporter	-0.000843778	-0.161395	-0.0410105	-0.0416991	-0.00554068	-0.0808708	-0.0312262
Carbohydrate metabolism	-0.118083	-0.00318737	-0.0340529	-0.0352353	-0.00138925	0.0246018	0.0251643
Cardiolipin synthesis	-0.109252	-0.0287991	0.0584116	-0.0568916	0.0225385	-0.0825302	-0.0765803
Carnitine shuttle	-0.0380938	0.0947227	0.14077	0.115537	0.0630088	-0.00322218	0.01839
Carnitine synthesis and transport	-0.0215994	0.0870246	0.153333	0.127888	0.0630563	-0.0358652	-0.0507991
Catechol metabolism	-0.0307967	-0.145086	0.0908873	-0.0468384	-0.0140322	0.0168505	-0.0324875
Chaperones	-0.0290832	-0.068257	0.179259	-0.0617645	0.0416523	-0.0807679	0.00660918
Cholesterol, bile acid, steroid synthesis	0.070428	-0.024558	-0.151506	0.097245	-0.045401	0.0776666	-0.0440204
Cholesterol-associated	-0.00942109	-0.0618303	-0.192239	0.0428127	0.0777306	0.0175777	0.000472059
Choline and betaine metabolism	-0.0392723	0.153455	0.0236554	0.046402	-0.010052	0.0813142	-0.0463046
Coenzyme A metabolism	-0.0653789	-0.0539174	-0.155727	0.0522873	0.0847552	0.00320225	-0.0331415
Coenzyme Q metabolism	0.0914197	0.0789579	0.0174329	-0.101826	0.0956095	-0.0652586	-0.00399775
Complex I	0.0926784	0.0986587	-0.0272614	-0.0602754	-0.0463578	-0.0151789	0.0338772
Complex II	-0.10862	0.040469	-0.056401	-0.0259631	0.0142833	0.0953893	-0.00835814
Complex III	0.109268	0.0650231	0.0146443	-0.0331628	-0.0403085	0.0226398	-0.00115391
Complex IV	0.106616	0.0648493	0.0450738	-0.0471008	-0.0243219	-0.0169927	0.0420655
Complex V	0.047014	0.143451	0.00518352	-0.112586	-0.0248481	-0.0163396	0.0561576
Copper metabolism	-0.093775	-0.103834	-0.00845751	0.0409252	-0.010178	-0.0130699	0.0435169
Creatine metabolism	0.0229066	0.0210617	0.062004	0.263758	-0.0165157	0.173188	0.00691981
Cristae formation	-0.114678	0.0255759	0.0314366	-0.0706819	-0.00913651	0.0179406	0.110759
Cytochrome C	-0.105478	0.0798154	-0.0154442	0.016172	0.0236498	-0.0117323	0.0116462
Cytochromes	0.109573	0.0645548	0.0136273	-0.0293603	-0.0413864	0.0217672	-0.00117988
Detoxification	0.106285	-0.0119674	-0.0749101	-0.0624199	-0.0616559	0.068976	-0.0372785
EF hand proteins	0.0964196	-0.061179	-0.0963004	0.0408892	0.0372435	0.0255083	-0.0687127
Eicosanoid metabolism	0.0719274	-0.0784773	-0.00308008	0.160176	0.147719	-0.012556	0.042917
Electron carriers	0.1087	0.0677217	0.0120303	-0.0286245	-0.040621	0.022955	-0.0433378
Fatty acid oxidation	-0.0539592	0.0917398	0.13074	0.11512	0.0326533	-0.017494	-0.0168923
Fe-S cluster biosynthesis	0.111244	0.0180314	-0.027731	-0.0459736	-0.0271932	-0.124797	0.0249458
Fe-S-containing proteins	0.0889594	0.0996502	-0.0625566	-0.0368476	-0.0283433	-0.0322481	-0.0767176
Fission	0.115811	0.00269668	0.0156907	0.00437843	0.0161832	-0.107287	0.0426273
Folate and 1-C metabolism	0.000628588	-0.15449	0.0819921	0.0229824	-0.0484693	0.0102794	-0.0437083
Fusion	-0.0531865	0.0688232	0.100924	-0.145098	0.0939752	-0.154237	0.0431426
GABA metabolism	0.0316319	-0.123143	0.0285883	-0.117072	0.130674	0.136383	0.00846969
Gluconeogenesis	-0.106231	-0.066027	0.0443368	-0.0255579	-0.00370665	0.0622127	0.0194926
Glutamate metabolism	-0.014946	-0.0449876	0.202104	0.0382448	-0.054704	0.0066761	-0.00799274
Glycerol phosphate shuttle	-0.115203	0.0319464	-0.0391735	-0.0202091	0.0261181	-0.0392073	-0.00940049
Glycine cleavage system	-0.0923408	-0.0370597	-0.0397663	0.179266	-0.0398744	-0.0253665	-0.0906956
Glycine metabolism	-0.0436737	-0.0817744	0.0140926	0.0783714	-0.265212	0.0113334	0.063403
Glyoxylate metabolism	-0.117581	0.0266927	-0.00900752	-0.039659	-0.0280219	0.0119221	-0.0497569
Heme synthesis and processing	-0.0234065	-0.0927859	-0.119079	-0.0257639	-0.129695	-0.188651	0.0339429
Heme-containing proteins	0.112066	0.0495982	0.045782	-0.0152476	-0.0206119	0.000836859	-0.0126553
Immune response	-0.0489802	-0.101928	0.0680037	0.106877	0.151632	-0.111692	-0.0765966
Import motor	0.0538411	-0.0724857	0.0217465	0.0526407	0.0834053	-0.294013	0.185568
Intramitochondrial membrane interactions	0.00377708	0.159747	-0.012304	-0.0711398	0.0344963	0.0889419	-0.0407352
Iron homeostasis	0.111131	0.0276927	-0.0669838	-0.00632292	-0.0541733	-0.0243627	-0.0112847
Itaconate metabolism	-0.114732	-0.0287743	-0.0383151	0.00642754	0.0381794	-0.0605242	0.0211371
Ketone metabolism	-0.100776	0.0328828	0.0326699	0.140434	-0.062598	0.0511854	-0.0114718
Kynurenine metabolism	-0.113066	0.0402238	0.0139263	-0.0210717	0.0788612	0.030159	0.0552704
Lipid metabolism	-0.0397016	-0.125147	0.110034	-0.0709093	0.0318262	0.0695385	-0.124726
Lipoate insertion	-0.0597208	0.0455986	-0.0721619	0.223985	0.0607677	0.0898103	-0.0165726
Lysine metabolism	-0.115216	0.0342593	-0.035644	0.0182102	-0.0351799	-0.0306093	0.125627
MIA40	-0.00925752	0.117193	-0.0262574	0.190358	-0.0322733	-0.150558	-0.00514509
MICOS complex	-0.117512	0.0221514	0.0266359	-0.021068	-0.0266717	0.0361207	-0.00530577
Malate-aspartate shuttle	-0.108612	0.063844	0.00230785	-0.0644835	-0.0217863	-0.0184602	0.0195822
Metabolism	0.117091	0.034583	-0.00277241	-0.0184362	-0.038393	-0.000876355	-0.0546402
Metals and cofactors	0.115909	0.0428582	0.00540606	-0.0129693	-0.0336828	-0.00996911	0.0313163
Mitochondrial central dogma	-0.112138	0.0543761	0.0255168	0.0149439	0.000813853	-0.0515187	-0.0175391
Mitochondrial dynamics and surveillance	0.099148	-0.0656845	-0.000886263	-0.00338015	0.144369	-0.0271551	-0.169765
Mitochondrial permeability transition pore	-0.063301	-0.0322301	-0.111784	-0.178587	-0.0721707	-0.103979	-0.0263266
Mitochondrial ribosome	-0.106211	0.0515885	-0.0527788	0.0435363	0.0120704	-0.0926851	-0.00230464
Mitochondrial ribosome assembly	-0.0770953	0.0619216	0.0996868	0.143519	-0.0720041	-0.011242	-0.0853477
Mitophagy	0.0849303	-0.105697	0.0684134	-0.00326977	-0.0423277	-0.00047771	0.149376
Molybdenum cofactor synthesis and proteins	0.00706852	-0.0247516	-0.174292	0.169627	-0.0689136	-0.0245038	-0.0840684
NAD biosynthesis and metabolism	0.104518	-0.0256884	0.075555	-0.070182	-0.00100704	0.0953643	0.0848741
Nucleotide import	0.0524479	-0.086151	-0.107453	-0.128	-0.0242397	-0.15175	-0.0538374
Nucleotide metabolism	-0.0812195	0.0458936	-0.0778055	-0.0581404	0.0668608	-0.212563	0.0811436
Nucleotide synthesis and processing	-0.098074	0.0871709	0.013885	0.0358783	0.0604727	-0.0673625	0.0757359
OXA	0.0479013	-0.0661867	-0.160117	0.0020617	0.0915853	-0.109135	0.056521
OXPHOS	0.100323	0.0868589	0.00798546	-0.0569527	-0.0367416	-0.0129317	0.0759637
OXPHOS assembly factors	0.0637461	0.117702	-0.0163092	0.065136	0.070815	-0.157409	-0.415827
OXPHOS subunits	0.100417	0.0865777	0.00807166	-0.0572086	-0.0369609	-0.0126088	0.00188671
Organelle contact sites	0.0972125	-0.0555036	0.0806145	-0.0867078	0.031447	-0.0600004	-0.329746
Phospholipid metabolism	-0.0108732	-0.121762	0.133224	-0.0883501	0.0169398	0.0520997	-0.0240478
Polycistronic mtRNA processing	-0.0930525	0.105061	0.0138035	-0.0328028	0.0179922	-0.0219939	-0.0145731
Preprotein cleavage	-0.111358	0.0254648	-0.0332208	-0.0941541	0.0342505	-0.0273162	-0.116896
Proline metabolism	-0.0263211	-0.07394	0.177219	-0.0844815	0.0483903	0.00167306	-0.0171124
Propanoate metabolism	-0.0392618	-0.0806002	0.125431	0.104205	-0.120108	-0.13295	0.0239575
Proteases	-0.104406	0.0696418	0.0157779	-0.00486901	-0.0304524	-0.106214	0.0130064
Protein homeostasis	-0.0525239	-0.0520477	0.165777	-0.0621826	0.0318853	-0.115522	-0.01455
Protein import and sorting	-0.0930339	0.0789286	-0.0572615	-0.0783672	0.0184443	-0.0949153	-0.165682
Protein import, sorting and homeostasis	-0.0795934	-0.014627	0.128106	-0.09233	0.0344163	-0.135941	0.196162
Pyruvate metabolism	0.0813978	-0.0830991	-0.0978119	-0.0543088	0.092856	-0.00105364	-0.123485
Q-linked reactions, other	-0.0618219	0.128444	-0.074352	0.0390622	0.0428491	0.0487336	0.0325685
ROS and glutathione metabolism	0.105365	-0.00710753	-0.08558	-0.0594596	-0.0551466	0.0551882	-0.0111987
Respirasome assembly	0.105528	0.0270782	0.058566	-0.04689	0.0510128	-0.123494	-0.10074
SAM	0.0396519	0.129127	-0.100913	-0.080529	-0.00455844	0.0695733	0.0916417
SLC25A family	-0.0871264	-0.0772037	-0.0835591	-0.0651339	0.00177927	-0.114292	-0.0644631
Selenoproteins	-0.0523518	-0.0491502	-0.0578557	-0.174445	-0.20577	-0.0476272	-0.0736232
Serine metabolism	-0.0352174	-0.144357	-0.0308264	-0.00260849	-0.107613	0.111025	-0.00231891
Sideroflexins	-0.0785585	-0.0641844	-0.0707749	-0.0173363	0.132102	0.172449	-0.0440565
Signaling	-0.0557927	-0.129488	-0.071969	-0.0713875	0.00912126	-0.0817195	-0.00980536
Small molecule transport	-0.0725076	-0.113518	-0.0877332	-0.0136646	0.0511481	-0.0170049	0.178782
Sulfur metabolism	-0.0648141	0.0681983	0.141488	-0.0295172	0.112788	0.0372486	-0.151046
TCA cycle	-0.113697	0.0330683	-0.0447758	-0.0489374	-0.026801	0.0102281	-0.0371667
TCA-associated	-0.108687	-0.0621485	-0.0118126	-0.0277637	0.0368748	0.0721308	0.00902285
TIM22 carrier pathway	-0.0884188	0.00429151	-0.0524823	-0.106427	-0.161759	0.114391	-0.0680403
TIM23 presequence pathway	-0.113327	0.0294415	0.0168042	-0.0812934	0.024021	-0.0427016	0.0315858
TOM	-0.0753251	0.114577	-0.00457672	-0.109097	0.0284691	-0.0691367	0.0341526
Tetrahydrobiopterin synthesis	0.117454	0.0117392	-0.0428205	-0.0193075	0.0207343	-0.00168102	0.0903543
Trafficking	0.102988	0.0672331	0.0129872	0.0834668	0.0691987	0.0198665	-0.010372
Transcription	-0.102766	-0.0183728	-0.0708068	-0.119975	0.0406109	-0.000540965	0.071188
Translation	-0.106819	0.00844335	0.0798277	0.0312045	-0.0295721	-0.0991684	-0.0532256
Translation factors	-0.0493212	0.124911	0.0868781	0.0207082	-0.119862	-0.0337731	-0.0618081
Type II fatty acid synthesis	-0.0892177	-0.0345768	-0.133916	0.0392907	-0.0376554	0.00201736	-0.0268708
Urea cycle	0.056696	-0.0953806	0.0596065	-0.0749639	0.20157	-0.014394	0.124829
Vitamin A metabolism	0.0900366	-0.0649338	0.00508397	0.0947306	-0.155694	-0.0415152	-0.0652635
Vitamin B1 metabolism	0.115969	-0.00855193	-0.037919	0.0026969	0.0666447	0.0304421	0.0414949
Vitamin B12 metabolism	0.109667	-0.0411073	-0.0449454	-0.036331	-0.0322252	-0.0902632	0.0213188
Vitamin B2 metabolism	-0.0370344	-0.00367986	0.0222086	-0.027181	0.325459	0.0678529	-0.0828742
Vitamin B6 metabolism	0.0879646	0.0837788	-0.0382677	-0.0737668	0.127318	-0.034469	0.0614616
Vitamin C metabolism	-0.0608396	0.128046	-0.00123596	0.0439167	0.133732	-0.0416085	0.0326551
Vitamin D metabolism	-0.0214851	-0.0868404	-0.144929	-0.161374	-0.000941596	0.00636853	-0.013085
Vitamin metabolism	-0.013357	-0.165036	0.0167575	0.0486347	-0.0353799	0.00125598	0.0563099
Xenobiotic metabolism	-0.040204	-0.0398889	0.163756	0.00105532	-0.0969358	0.173547	-0.011428
cAMP-PKA signaling	0.0175002	0.142174	0.0739018	-0.0859779	0.0938207	0.0483922	-0.0408398
fMet processing	-0.0227619	-0.0859818	0.065755	0.115859	0.230897	-0.0909168	0.137515
mt-mRNA modifications	-0.062115	-0.0413019	-0.0313879	0.0435333	0.254019	0.135932	0.0717788
mt-rRNA modifications	-0.0392778	-0.0207614	-0.151141	0.101417	0.122667	0.165716	-0.026628
mt-tRNA modifications	-0.110822	0.0508637	0.0230034	0.0685082	-0.0281583	-0.0156963	-0.0111044
mt-tRNA synthetases	-0.00812548	-0.0900563	0.172152	-0.0520189	-0.0786679	0.0144171	-0.0408895
mtDNA maintenance	-0.106139	0.0714783	-0.0243471	-0.0579457	0.0101296	-0.0121437	-0.0485049
mtDNA modifications	0.0432201	-0.115866	-0.0583344	-0.0622733	0.18829	0.0300704	-0.0937704
mtDNA nucleoid	-0.111362	0.00719871	-0.0481424	-0.0908849	-0.038539	0.020777	-0.0140062
mtDNA repair	-0.118292	0.0236063	-0.00705789	-0.019432	-0.000910882	-0.047163	0.0296062
mtDNA replication	-0.0895499	0.0930709	-0.026903	-0.110418	-0.0201181	-0.0375828	-0.0605581
mtDNA stability and decay	-0.0560292	0.114298	-0.055387	-0.0852866	0.125683	0.10276	-0.0170936
mtRNA granules	-0.0872212	0.106273	-0.0442358	-0.0318084	-0.0623056	0.00596588	0.0415579
mtRNA metabolism	-0.0590556	0.136872	-0.0552669	0.0366139	0.0495868	0.0391805	0.139104
mtRNA stability and decay	-0.000142591	0.165958	0.00040674	-0.0605151	0.0220068	0.0139151	-0.0277604

## Sheet: Suppl_FigS8C
Pathway	PC1	PC2	PC3	PC4	PC5	PC6	PC7	PC8	PC9	PC10	PC11	PC12	PC13	PC14	PC15	PC16	PC17	PC18	PC19	PC20	PC21	PC22	PC23	PC24	PC25	PC26	PC27	PC28	PC29	PC30	PC31	PC32	PC33	PC34	PC35	PC36	PC37	PC38	PC39	PC40	PC41	PC42	PC43	PC44	PC45	PC46	PC47	PC48	PC49
ABC transporters	0.0837203	-0.0226397	-0.122801	-0.0494322	-0.0900275	0.089444	0.00526903	0.0459106	-0.0552658	0.127436	-0.0165713	-7.7514e-05	0.117747	0.0663552	-0.0893184	-0.0461872	0.0516962	-0.121469	-0.0489649	0.0697807	-0.147373	-0.135182	-0.16922	0.184218	-0.0775169	0.0592059	-0.0300799	-0.0848751	-7.06764e-05	0.0697964	-0.0973837	-0.0224206	-0.0110033	-0.0223823	-0.0922802	-0.171289	-0.0546434	-0.0442843	-0.0833956	0.004553	0.10294	-0.114979	0.219504	-0.112381	0.14642	0.00554735	0.0245711	0.0801473	0.0418038
Amidoxime reducing complex	0.0208381	0.0567291	-0.0050835	-0.0999588	0.0817722	-0.144246	-0.0684621	0.222293	-0.0261799	-0.0913089	-0.129318	0.059346	0.11205	-0.0969761	-0.114765	0.0474894	0.018765	-0.0257486	0.010395	0.14421	-0.00799881	-0.0576021	0.108343	-0.0422036	-0.0154353	0.0559317	-0.123258	-0.0701012	0.0174367	0.0163729	0.0784297	-0.0561301	0.0646781	-0.0495914	-0.0407625	-0.0702211	0.0126879	-0.224941	0.0947137	-0.192685	-0.0972161	-0.0686008	0.0707074	-0.0718681	0.0543914	-0.0567347	0.21263	-0.148497	-0.00708484
Amino acid metabolism	-0.0013198	0.146514	0.0598043	-0.166895	-0.0627631	0.0111984	0.0317056	0.0509054	0.032891	0.0524208	-0.00289473	-0.183487	-0.0137651	-0.0399332	-0.0307349	0.064194	-0.0291334	0.00593045	-0.0371143	0.0460076	0.110012	0.0313324	0.0395081	0.0418412	-0.0500895	0.00435532	0.0573519	-0.0158868	-0.0871919	-0.0351113	0.0177562	0.0278605	-0.122533	0.0668472	-0.05476	-0.012291	0.0357899	0.0357126	0.00302203	-0.0174412	-0.0188033	0.00198707	0.0286397	0.0613116	0.0197361	0.0399886	-0.0973855	0.0040303	-0.0954181
Apoptosis	0.0185927	-0.107408	0.0376617	-0.0540351	-0.172416	-0.0200345	0.0786626	0.1586	-0.0965259	-0.00309427	-0.0509127	0.104619	-0.0685358	0.1464	-0.0543573	-0.00594734	0.107199	-0.067753	0.0275171	-0.0282575	0.104087	0.0543668	-0.0315226	0.117673	0.0667443	-0.0870776	-0.0903405	0.035579	0.0245273	-0.117273	0.0286923	-0.0307438	0.0550897	0.0317695	0.0702498	-0.138512	0.0463013	0.142425	-0.0372843	-0.0381307	-0.0401421	0.022874	-0.0129863	0.0157469	0.0297509	-0.115017	0.0139737	-0.0308507	0.0332688
Autophagy	0.01449	-0.13526	0.0536153	-0.0407373	-0.141377	0.0588517	-0.0409901	0.139075	0.0064315	-0.0695008	-0.0403115	-0.0412845	-0.184169	0.0226843	-0.0573293	0.147133	-0.0411479	0.096268	-0.019721	-0.0682326	-0.0821907	-0.0178892	0.0206829	-0.0816744	-0.0215207	0.111261	0.102379	0.0635782	-0.0789858	0.0470222	0.00155845	0.00236842	-0.0708167	-0.0693808	0.0558498	-0.0193524	-0.073742	0.0355926	0.0108941	0.0133343	0.0353308	-0.0159609	0.110863	0.00358052	-0.0607526	0.0066319	0.167894	0.0460961	0.010441
Biotin utilizing proteins	-0.0230745	0.00746143	-0.104687	-0.00162498	-0.113379	0.135109	0.0109387	-0.10853	0.15157	-0.133714	0.0428715	0.138122	-0.0151575	-0.122935	-0.180666	-0.0863338	0.0327358	-0.164362	-0.12122	0.0569457	-0.0100082	-0.0562554	-0.0860946	-0.0411224	0.120386	0.0700746	-0.0183845	0.0368261	0.0318155	-0.0550559	-0.0913527	0.14881	-0.10042	-0.0739027	0.102255	0.0427275	-0.01317	-0.125446	0.0806587	0.0270757	-0.119176	-0.0126499	-0.0668358	-0.11024	-0.0682392	0.03746	-0.0698651	0.00633212	0.0723999
Branched-chain amino acid dehydrogenase complex	0.0877958	0.0629623	0.0168207	0.0508193	-0.100923	0.122595	-0.0872206	0.0537893	-0.0652662	-0.0453634	-0.147013	-0.135246	0.0597627	0.0679574	0.0727465	-0.0242562	0.108612	0.0120777	-0.00351002	0.0648722	0.181604	-0.0517131	0.100501	-0.0139955	0.00423601	0.0654317	0.0879737	0.0536924	0.052593	0.0237628	0.194529	-0.118905	-0.0147528	0.00725265	-0.018169	0.0958254	-0.102172	-0.116492	0.103424	0.163444	0.0875779	0.111764	0.0327771	0.0943644	0.00600348	-0.0176944	-0.113068	-0.0993576	0.0100905
Branched-chain amino acid metabolism	0.0314109	0.164205	0.0355369	-0.0848509	-0.151656	0.0535437	-0.0201605	-0.0253757	-0.0138718	-0.0749063	-0.0763624	-0.0534679	0.0230042	-0.00661858	0.00615663	0.00806677	0.0389273	0.0419948	-0.0320999	-0.0149595	0.0251062	0.00539597	0.106073	0.0631817	-0.0596555	-0.00194176	0.0920793	0.0329856	-0.000469209	0.00716672	0.0291291	-0.0211522	-0.0643915	0.053	0.00697218	0.0291696	0.0162456	0.0239776	-0.0257146	-0.00446381	-0.0233323	0.0521393	-0.0214864	0.0043294	-0.0251515	0.0667266	-0.0730521	-0.017006	0.0587048
Calcium cycle	0.0888465	0.0670651	0.00176467	0.204138	0.0281902	0.0299071	0.0113343	0.00305228	0.0864967	-0.0164934	0.0245187	-0.174735	-0.00627444	0.069749	-0.0963185	0.0468635	-0.00651787	-0.101585	0.00114799	-0.0128578	-0.00528627	0.0486261	0.0504368	-0.00485938	0.00647738	-0.0238074	0.165868	0.0710783	0.0706172	0.0748332	-0.0150789	-0.031501	0.00486567	0.0320571	0.0501934	-0.0314887	-0.000960971	-0.100889	-0.0869914	-0.0562965	-0.0783459	-0.0748051	0.0458908	-0.0468775	-0.026852	0.0972407	-0.00280705	-0.000365813	-0.0291668
Calcium homeostasis	0.0814356	0.0387257	0.014952	0.17662	0.00622493	-0.0536953	0.164889	0.0884019	-0.0382035	0.0503938	0.124487	-0.101724	-0.0274909	0.0767865	-0.154823	-0.0333723	-0.0808246	0.0193511	-0.016252	0.0297541	-0.0291081	0.0553104	0.073182	-0.00281869	0.0303096	-0.103672	0.0173962	-0.0066827	0.0636142	0.0543292	-0.102594	-0.0674258	-0.0427942	-0.0264219	0.0497298	-0.0459124	0.0703888	-0.084379	0.0920852	0.073929	-0.0140192	-7.33614e-05	0.000228633	-0.00101018	-0.108704	0.0924895	-0.0289383	0.021747	0.0309964
Calcium uniporter	0.0559266	-0.0229562	0.00525098	0.0782185	-0.0791487	-0.00751376	-0.00663069	0.126987	0.212022	0.122885	-0.0329327	-0.152634	-0.106507	0.0479145	-0.0614797	0.197961	0.078496	-0.0312609	0.0929351	-0.125757	0.132796	-0.0748677	0.0427991	0.126657	-0.0576822	-0.165879	0.00120133	-0.138121	0.10777	0.0244659	-0.254024	0.064919	-0.0798005	-0.0968901	-0.0859678	0.0268565	-0.100168	0.0748203	-0.142847	0.0090929	-0.0134181	-0.172993	-0.0294537	-0.154924	0.160949	0.0813818	0.0375952	-0.191432	-0.0958916
cAMP-PKA signaling	0.0196652	-0.0536688	0.0162976	-0.0288031	0.00986767	0.0286404	-0.164709	-0.0174506	-0.222304	-0.0698045	-0.0398943	0.0712965	-0.0288303	-0.0545862	-0.108323	0.14056	0.070996	-0.164627	0.0531741	-0.252247	-0.106487	0.0574776	-0.0407496	0.0729873	0.19814	0.153133	0.127842	-0.252047	-0.140366	-0.0153967	-0.147564	0.0792153	0.203414	-0.118716	-0.125565	0.135887	0.0283833	0.0224674	0.180278	0.10335	-0.0261112	0.0547677	-0.0966667	0.204909	-0.173145	0.0644895	0.0615596	-0.147701	-0.121273
Carbohydrate metabolism	0.0420927	0.165028	0.134362	0.0424211	-0.0712705	0.0662232	0.0136162	-0.0334738	-0.0317524	-0.0321518	-0.0168268	0.022746	-0.0206447	-0.0703814	-0.0468373	0.034316	0.0221539	-0.0503655	0.0851106	0.0379788	0.00362913	-0.0201335	-0.0382285	-0.0248137	0.0674852	0.0206049	-0.0591462	-0.0230696	0.00801392	-0.0194722	0.00951559	0.0686134	0.00567634	-0.0033225	0.00986492	-0.0573193	-0.0215808	0.0127558	-0.0368662	-0.0531672	-0.0161019	0.0139237	0.0303839	-0.00832799	0.0176331	-0.00836462	-0.0219473	0.0386297	-0.0466601
Cardiolipin synthesis	0.108356	-0.000816825	-0.0313274	-0.0544948	-0.0355576	-0.0834527	-0.0103728	-0.0220422	-0.123095	-0.062288	-0.0817039	-0.0190308	-0.0707466	-0.0904621	-0.14936	-0.00323413	0.0714997	-0.202914	-0.194184	-0.0327774	-0.00535132	-0.0669977	-0.136919	-0.2205	0.0730221	-0.145204	-0.0424771	0.0955265	-0.0751532	-0.0801952	0.0770074	-0.000333498	0.066594	0.0596813	-0.0161026	0.135163	-0.0198538	-0.0743035	0.061736	0.146936	0.0694422	0.00145062	0.0727457	-0.324107	-0.186827	-0.147998	-0.0461609	-0.154516	-0.0935995
Carnitine shuttle	0.0298554	0.10537	0.0583868	-0.074755	0.156256	0.0119614	-0.0520835	0.0880483	-0.0774348	0.181442	-0.00357016	0.0368623	0.0644817	0.0113825	0.0680144	0.0776344	-0.100728	-0.000242568	-0.118731	-0.0512358	-0.106669	0.147523	-0.0341866	-0.0853145	0.128263	-0.148127	0.0273172	-0.111338	0.0476522	-0.0315486	0.118377	-0.124834	-0.107986	-0.168035	0.125423	0.113444	-0.0798851	0.0355786	-0.0206836	-0.062979	-0.147514	-0.0682802	-0.0159929	-0.0606175	0.0152501	-0.130664	0.0397698	0.0588683	0.03458
Carnitine synthesis and transport	0.0375608	0.108669	0.0584518	-0.0691645	0.140951	0.0234058	-0.0516225	0.103986	-0.0781861	0.17922	-0.000715726	0.0361178	0.0682369	0.0128916	0.0768371	0.0791754	-0.0915384	-0.00948785	-0.111019	-0.0571781	-0.111038	0.134629	-0.0169079	-0.0681185	0.13621	-0.150678	0.035253	-0.112078	0.0329875	-0.0346567	0.111621	-0.139229	-0.105648	-0.166756	0.140872	0.107136	-0.0798584	0.0528136	-0.0253794	-0.0546698	-0.147754	-0.0631301	-0.010302	-0.0500792	0.0178524	-0.154041	0.0359441	0.0635182	0.0290411
Catechol metabolism	-0.00452387	0.0599449	0.00824674	-0.13464	0.107847	-0.0730091	0.0513473	0.206551	-0.0758681	-0.0542836	0.088893	0.0408019	0.112578	-0.0631559	-0.180156	-0.112598	-0.0301576	-0.016642	0.0722111	0.0436926	-0.0552242	-0.0397568	0.0971073	-0.0103292	-0.059091	0.0128263	0.0217323	0.048112	-0.0491437	0.240114	-0.029758	-0.138386	-0.1274	0.0988084	-0.00890528	-0.114763	-0.00214713	0.139684	-0.13598	0.112626	-0.00457563	0.0478686	0.0105693	0.14106	0.0381585	0.00674269	-0.11419	0.0051808	-0.205998
Chaperones	0.0536492	-0.02758	0.0972056	-0.0600724	0.00225763	-0.20934	0.0733314	-0.0261681	0.0532791	-0.200762	-0.0172763	-0.0602056	-0.00080057	0.0613936	0.0644864	0.137444	0.0685163	0.0140659	-0.0338344	0.0460164	-0.0199241	-0.0462092	-0.0132659	-0.0572016	0.15788	0.0788026	0.0521898	-0.049851	0.0509048	0.0690877	0.126114	-0.0627757	0.135405	0.0676751	-0.0134455	0.0499212	-0.05752	-0.0633172	-0.0418269	0.0296509	0.026734	-0.263658	-0.125385	0.0851677	0.0955508	0.125347	-0.149567	0.162103	-0.0114291
Cholesterol-associated	-0.00228913	0.0309255	-0.0787493	0.0676313	-0.0171746	0.0396309	0.103483	-0.082058	0.110242	0.0601477	-0.0531619	0.227631	0.020897	0.0329287	-0.360231	-0.0745031	-0.0617874	0.111883	0.136292	0.0897704	0.106994	-0.0725616	-0.0313956	-0.0903814	0.0702672	-0.0165802	-0.0505417	0.0277905	-0.119476	-0.154169	0.0778906	-0.0121518	-0.0539533	-0.0577022	0.0229781	0.156058	0.049697	0.079177	-0.115466	-0.00358064	-0.0342898	-0.140532	0.0175468	0.0616412	-0.0857765	0.00413577	0.0359227	0.113238	-0.169525
Cholesterol, bile acid, steroid synthesis	0.0149835	0.0276905	-0.0388192	-0.0162576	-0.0217277	-0.114279	-0.0884904	-0.0558648	0.0326422	-0.19171	0.0196967	0.0406828	0.2443	0.335069	-0.115019	0.187502	-0.0834362	-0.0235135	0.0266347	0.118959	0.100122	0.0999265	-0.088042	-0.0603364	-0.0527747	-0.0606385	-0.00239731	0.0631531	-0.0309884	-0.0171307	-0.0723296	-0.00333427	-0.0978771	-0.0293849	0.0198239	-0.0114145	0.0160516	0.0293687	0.0312017	0.0983129	0.000418259	0.0816158	0.0887986	0.0253609	0.0441495	-0.0811584	0.0153494	-0.0155639	0.0311564
Choline and betaine metabolism	0.0131794	0.142358	0.0747466	-0.15514	-0.061408	0.030069	-0.0272487	0.0805829	-0.0345635	0.026562	-0.0194123	-0.0494225	-0.00484461	0.0722084	-0.0237423	0.0186397	0.0475709	0.0171063	-0.112317	-0.0126162	-0.00023081	-0.0660022	-0.0511801	-0.0664817	-0.0847401	0.0897034	-0.0737507	0.0488841	-0.018112	-0.0253665	-0.137728	-0.0956474	-0.0756764	-0.0119972	0.0557773	0.254307	-0.0771859	-0.0103955	-0.017323	0.0632677	0.0107534	0.122622	-0.155877	0.0765159	0.124473	0.175186	0.134093	0.0202367	0.0338693
CI assembly factors	-0.00388523	-0.130232	0.13187	0.0102104	-0.00453284	0.0145059	-0.0147021	-0.118546	0.0023374	0.0668341	0.0255134	0.0706533	0.0761663	-0.129464	-0.124645	0.165621	0.00114065	0.0670738	-0.0952515	-0.159148	0.0211125	-0.0851606	0.060949	-0.0278224	0.0110845	-0.115027	0.145755	0.079658	-0.0314668	0.011199	0.0091516	0.00556301	-0.0107276	-0.00590101	-0.0644548	-0.174871	-0.137476	0.0152539	0.0126374	0.165862	-0.000637567	0.0759085	-0.113515	0.0359553	0.276132	-0.00737373	0.0185468	0.0870142	-0.0494991
CI subunits	-0.151496	-0.0478288	0.0948972	0.00834809	-0.02434	-0.051763	0.0482609	-0.0159927	-0.0410286	0.0284197	-0.0874106	-0.00585231	0.0675751	0.00409675	0.0176314	-0.0469016	-0.00177419	-0.0826237	-0.00927027	0.0455753	-0.0133619	-0.00230955	0.0407093	0.00634565	0.0186937	0.0452868	-0.0218774	-0.0219742	-0.0312789	-0.0245075	-0.0612987	0.0107652	-0.0352293	0.00749568	-0.0104929	0.0502942	0.0103995	-0.02624	0.0448219	0.0739401	0.0530999	0.0491447	0.130168	0.0688089	0.0250421	-0.0131817	0.068605	0.0832025	-0.0438778
CII assembly factors	0.0907422	-0.0757712	-0.0476677	-0.0553958	-0.0201444	0.063934	0.101843	0.136765	0.0703791	0.0391307	-0.110176	0.0267035	0.145408	9.10712e-05	-0.0529672	-0.0197939	-0.105967	-0.00588412	-0.0509564	-0.0856316	-0.0279675	-0.00304729	0.0905228	-0.0828707	-0.129525	0.0985931	-0.0657887	-0.0394005	-0.127531	-0.0552466	-0.0518612	0.145929	-0.106606	0.0430276	-0.167852	0.00406833	-0.0378302	-0.0115392	-0.0389828	-0.24594	0.285632	-0.0751537	-0.177026	0.0762289	-0.173728	-0.0742692	-0.11033	0.146949	0.225765
CII subunits	0.0581301	0.146264	0.106278	0.102046	-0.0362133	0.00954683	0.0285254	0.0667943	0.0835055	0.00342537	-0.0866713	0.0880684	0.000262104	-0.0392378	0.0163094	0.106903	0.0842355	0.0470195	-0.00309039	-0.070991	0.0480064	-0.02063	-0.0017629	-0.0228122	-0.0720244	0.0280057	0.111336	-0.0411784	-0.0616716	9.65983e-05	-0.0538253	-0.00961047	0.0188376	0.0482342	0.0259955	-0.0479649	0.127936	-0.0448586	0.0861971	-0.0341903	-0.0905907	0.019502	0.0122979	0.0199754	-0.0462458	-0.00640291	0.00374281	-0.0728314	0.00866409
CIII assembly factors	0.0139841	-0.0834524	0.0641168	-0.064189	0.0523652	0.194029	-0.0337406	0.0139443	-0.0848948	-0.00777539	0.0496911	-0.0302673	0.118082	0.0898892	-0.0119691	-0.0602104	-0.190595	-0.0372046	0.00721225	-0.0708105	-0.0789873	-0.138458	0.0852173	0.177335	0.105385	0.00400397	-0.0331852	0.0699102	-0.164699	-0.116003	-0.147241	-0.202372	0.0593212	0.256734	-0.0270245	0.00982121	0.0125063	0.0388054	0.0245752	-0.00799441	-0.0304957	-0.145367	-0.0805341	-0.130378	-0.0565875	-0.158061	0.0129579	-0.143823	0.158132
CIII subunits	-0.155424	-0.01439	0.0767859	0.0542139	-0.0622393	-0.00373972	0.0111461	-0.0530805	-0.0120208	0.0124833	-0.107106	-0.0216095	0.046559	0.0111305	0.0162166	0.0100905	0.000647869	-0.0439492	-0.0430343	-0.0827164	-0.014345	-0.0857232	-0.00225458	-0.022213	-0.0330499	-0.0251664	-0.0628535	-0.109916	0.055991	0.0472893	-0.0233885	-0.0590824	-0.0818403	-0.0264444	0.0525237	-0.00866309	-0.079761	0.00745677	0.00400277	-0.0141525	0.0484863	0.00516288	0.0880742	-0.0293061	-0.0660712	0.0217642	-0.00234411	-0.0325827	0.0165637
CIV assembly factors	0.0052591	-0.0637709	0.0715098	-0.109257	0.00333543	0.162453	0.081278	0.16654	0.11535	0.0173752	0.0466519	0.145423	0.0963048	0.0960796	0.129117	-0.0831701	-0.12114	-0.0465352	-0.0696663	-0.0342521	0.0824264	0.0524596	-0.0169025	-0.0301258	0.0334577	0.0396905	-0.003416	-0.00795207	0.163363	0.0855171	-0.013455	0.155411	-0.0194957	0.0233043	-0.00197189	0.063293	-0.0535389	-0.0783983	-0.0371033	-0.0437647	0.00413183	0.00184456	-0.0293854	-0.0754901	-0.0817175	0.0189005	-0.0146967	-0.120508	-0.144765
CIV subunits	-0.155857	-0.0495226	0.0727397	0.0360847	-0.0265459	-0.0183418	0.0543902	-0.0323118	-0.00402358	0.0752089	-0.040842	-0.0351231	0.055725	0.0153216	-0.00502052	0.00741565	0.00292751	-0.0417869	0.00136454	0.0772054	-0.0174232	0.0870036	0.0995981	-0.00827706	-0.0147619	0.0616254	-0.00238805	0.0744208	-0.0401345	-0.0388014	-0.00158739	0.00215203	0.0591158	-0.071634	-0.0141993	0.041918	0.0450349	0.0487756	-0.0243469	-0.0274247	-0.0810706	-0.100098	-0.0383077	0.030527	-0.0201202	-0.0395023	-0.0315296	-0.0309929	-0.0187737
Coenzyme A metabolism	0.113368	-0.00327848	0.0259258	-0.0812379	-0.0428316	-0.073868	0.0286782	-0.0488141	-0.16332	-0.0521833	-0.0333875	-0.0191267	-0.0537104	-0.0494607	0.0231188	-0.0588147	-0.103711	0.0162834	0.137546	-0.0206943	0.132	0.0977275	0.145239	-0.0227004	-0.254813	-0.0673458	-0.118439	0.0710925	0.0798671	-0.0672741	0.0215961	-0.0033765	0.114946	0.0347205	0.162448	0.187673	-0.164219	0.0884155	0.218852	-0.0483226	-0.104922	-0.0159553	0.0455911	0.0461361	0.124278	0.0116257	-0.159875	-0.187063	0.077831
Coenzyme Q metabolism	0.0554289	0.0433334	0.110795	0.109339	-0.095395	0.0598543	-0.169419	0.0491243	-0.118139	-0.0642174	0.0497201	0.00416111	0.0293861	0.0352621	-0.00034485	-0.0310195	-0.0190455	0.050221	0.0965896	0.0432171	-0.185278	-0.0414308	-0.0910141	-0.178599	-0.1358	0.0265921	-0.0358171	-0.0937465	0.0767913	-0.0104397	-0.0749609	0.216277	0.0887543	-0.0336035	0.0272627	-0.0146781	-0.0213656	0.011934	-0.0203035	-0.0088489	-0.0649777	-0.229255	-0.186206	0.0168876	0.00609425	-0.0948161	-0.0814226	0.106941	-0.0911556
Complex I	-0.151605	-0.0480664	0.0952158	0.00796839	-0.0243282	-0.0513654	0.0483836	-0.0165146	-0.0412008	0.0280799	-0.0863514	-0.00567975	0.0667892	0.00424796	0.0171863	-0.046154	-0.0013606	-0.0820433	-0.00957311	0.0445677	-0.0129363	-0.00198715	0.0403932	0.00623372	0.0183534	0.0446309	-0.0214463	-0.0217001	-0.0315707	-0.0242712	-0.0604417	0.0103424	-0.0353755	0.00766076	-0.0106477	0.049495	0.00972575	-0.0266861	0.0442492	0.0736859	0.0530959	0.0489592	0.128926	0.0684349	0.0257902	-0.0129475	0.0677739	0.0825952	-0.0437727
Complex II	0.0704168	0.134328	0.100664	0.0949864	-0.0363457	0.0139048	0.0433223	0.0843318	0.097766	0.00736386	-0.104368	0.0927623	0.0149696	-0.0415223	0.00605793	0.106947	0.0664282	0.048261	-0.0130682	-0.0867179	0.0463979	-0.0227365	0.00669862	-0.034436	-0.0889521	0.0383161	0.1034	-0.0485974	-0.0760354	-0.0105562	-0.0632201	0.00913319	0.00770927	0.0542568	0.00965818	-0.0468151	0.121272	-0.0418602	0.0838526	-0.0626002	-0.0539505	0.0131364	-0.0114486	0.0286659	-0.0629126	-0.0195891	-0.00721797	-0.0558015	0.0376971
Complex III	-0.155644	-0.0147711	0.0775479	0.0525426	-0.0617369	-0.00178416	0.0113248	-0.0533607	-0.0137105	0.0115949	-0.105292	-0.0219036	0.0466512	0.0126496	0.016227	0.00917068	8.26133e-05	-0.0444896	-0.0434745	-0.0831117	-0.0140189	-0.0855194	-0.0013217	-0.0206678	-0.0329128	-0.0248517	-0.0623711	-0.108612	0.0530581	0.04635	-0.0236107	-0.0613929	-0.0816019	-0.0245209	0.051529	-0.0091948	-0.0796002	0.00714635	0.00228777	-0.0152648	0.0480869	0.0034499	0.0864199	-0.0300268	-0.0655792	0.0207383	-0.00335069	-0.034381	0.0187876
Complex IV	-0.155954	-0.049766	0.073356	0.0350153	-0.0264028	-0.0175312	0.0547091	-0.0320251	-0.0043653	0.0746826	-0.0400158	-0.0343963	0.0551023	0.0161969	-0.0048079	0.00738847	0.00325727	-0.0415133	0.00103096	0.0763691	-0.0167001	0.0871186	0.0988427	-0.00861711	-0.0150078	0.0612634	-0.00200349	0.0742117	-0.0398304	-0.0379085	-0.00116431	0.00196809	0.0583669	-0.0711645	-0.0142033	0.0416818	0.0444058	0.0481303	-0.0248851	-0.0275902	-0.0802953	-0.099385	-0.0384752	0.0302337	-0.0199405	-0.0387902	-0.031917	-0.0314159	-0.0192232
Complex V	-0.145674	-0.0114336	0.0863698	0.0495655	-0.0316375	-0.0418667	0.00362758	-0.0508237	-0.0268948	0.0345102	-0.141994	-0.0381235	0.0617605	0.0250325	0.0302889	-0.0534687	-0.0638902	-0.142474	-0.0213276	-0.0530632	0.0729245	-0.0453457	0.0465826	0.0281806	-0.00713707	-0.0246716	0.100617	0.00746531	0.0364319	0.04827	-0.0666159	0.0826838	-0.0357662	0.0637515	0.0888472	0.0663799	0.0808533	-0.0802905	0.0130506	0.0406513	0.0225765	-0.0557248	-0.00634834	0.00362318	0.0325723	-0.0493358	-0.0255883	0.054375	0.020935
Copper metabolism	0.075316	0.0643565	0.0197239	0.188111	0.0651359	0.0650215	0.0507443	-0.00757728	0.0900135	-0.0227537	0.0693622	-0.152107	0.0372257	0.0710424	-0.0710213	-0.000125725	-0.0516736	-0.109368	-0.0557878	0.032893	-0.0460675	0.0922785	0.0938365	0.0372414	0.0512102	-0.0279508	0.185707	0.142937	0.0644971	0.0197392	0.134704	0.0475147	0.0727957	0.0463307	0.124706	0.00105305	0.00530059	-0.120628	-0.0672672	-0.105595	0.0170002	-0.0147362	0.0638546	-0.00342579	-0.142418	0.0738088	0.0016033	0.0190453	0.0184495
Creatine metabolism	-0.00346532	0.0312219	-0.0106729	-0.0323834	-0.180206	0.108947	0.0373111	-0.0424625	-0.174165	-0.0413273	0.0659393	-0.120327	0.0681242	-0.0433256	0.0762886	-0.124674	-0.0497532	0.163632	-0.0932786	0.02835	0.123082	-0.0114156	-0.0823893	-0.281397	0.184741	-0.112941	0.0121485	-0.0112281	-0.0136634	-0.059627	-0.102525	-0.154433	0.105343	0.128461	-0.195097	-0.0570231	0.185144	-0.0219931	-0.138793	-0.0447806	0.117952	-0.146319	0.0781936	0.00138298	0.116889	-0.00326061	0.0321104	-0.130214	-0.110113
Cristae formation	-0.0555387	-0.0276009	0.213212	0.00252475	0.105729	0.0387477	0.114314	0.0461304	-0.00041382	0.00246217	0.0893837	0.022538	-0.0127312	0.068232	-0.00907677	-0.0528611	0.00541344	-0.0577263	-0.049152	0.0072005	-0.00605734	0.0467726	-0.0679063	0.0314911	0.0173227	0.0128923	-0.000893445	0.0642965	-0.0349705	-0.0176721	0.0116006	0.0488139	0.103646	-0.0415051	0.0249831	0.0168452	0.00474392	-0.153605	-0.0142588	-0.00228774	0.0129734	0.126001	-0.0185351	-0.0567833	0.0151372	0.170837	-0.0753487	-0.0197144	0.00503569
CV assembly factors	-0.0283929	-0.0353657	0.104269	-0.00686937	-0.037324	0.229461	-0.0320206	0.00914629	0.024926	-0.0475921	0.0958384	0.00187763	0.0506112	0.170674	-0.0689646	0.0517474	0.0570776	0.136146	-0.182261	-0.0393687	-0.109146	-0.082	0.0783215	0.0880375	-0.0131503	-0.0580635	-0.0496772	-0.000473646	-0.00230994	0.024123	0.183371	0.00853026	0.0690941	-0.0683583	0.0925259	0.0689116	-0.011522	-0.0968864	-0.0225885	0.153693	0.0244405	-0.0401827	-0.123947	0.103445	0.0758249	0.00560965	-0.104991	-0.166894	0.034629
CV subunits	-0.145446	-0.0113674	0.0862018	0.0501385	-0.031505	-0.0427015	0.00367224	-0.0504676	-0.0262607	0.0350157	-0.142908	-0.0381955	0.0622511	0.0242716	0.0308136	-0.0538394	-0.0642338	-0.143134	-0.020492	-0.0523191	0.073107	-0.0453093	0.046501	0.0279944	-0.00687684	-0.0246719	0.100897	0.00755876	0.037046	0.048117	-0.0676885	0.0834861	-0.0356417	0.0640089	0.0888648	0.0668743	0.0814979	-0.0797107	0.0132583	0.0406029	0.0224635	-0.0551919	-0.00574054	0.00312043	0.0324076	-0.0498612	-0.0247488	0.0554287	0.0207228
Cytochrome C	0.0297176	0.0806469	0.108405	0.116702	0.0461547	0.132613	-0.0230347	0.0885252	-0.00331434	0.113169	-0.0260002	0.0468313	0.0522962	0.134137	0.104574	-0.0379674	0.053144	-0.0190998	-0.00227262	0.0718369	0.0973576	-0.0284583	-0.213593	0.153896	0.186512	0.052281	-0.136267	0.0863361	-0.0849955	0.0772328	-0.0159859	0.0174046	0.0236155	0.11398	-0.0938795	0.102758	-0.0879181	-0.0292996	0.0357299	0.0268973	-0.147137	0.125398	0.0126634	0.0459972	-0.0506989	0.0351629	0.115413	0.0177743	-0.00248265
Cytochromes	-0.156557	-0.0154722	0.0699574	0.0522924	-0.0616384	-0.00108124	0.00939045	-0.0581464	-0.0107809	0.014488	-0.10957	-0.021894	0.0469624	0.0114537	0.0174536	0.0102149	0.00354979	-0.042645	-0.0428234	-0.0806296	-0.0100129	-0.0865578	-0.00967865	-0.0248411	-0.0298913	-0.0254902	-0.0595463	-0.110971	0.0579206	0.0492004	-0.023098	-0.0551383	-0.0841242	-0.0261225	0.0546985	-0.00734957	-0.0786708	0.01035	0.00345374	-0.0134582	0.04464	0.0107986	0.0892933	-0.0273277	-0.0626165	0.0266445	-0.00354468	-0.0269162	0.0161153
Detoxification	0.0125396	0.0335209	0.0205713	-0.118585	-0.126828	-0.121435	-0.173556	0.0300948	0.0845615	0.0648972	-0.0695647	0.109856	-0.157425	0.137697	-0.0497515	-0.122432	-0.00872478	-0.0129011	-0.150797	0.137684	-0.14392	-0.0336875	0.110909	0.0381609	-0.001445	-0.0148968	0.0199994	-0.0334119	0.0719301	-0.0433003	-0.0877392	0.0199524	0.105635	0.0937069	-0.0256728	-0.103529	-0.0703139	-0.0523799	-0.0175243	-0.088924	-0.0227166	0.0126541	0.0606317	0.0939788	-0.0843329	0.0547757	0.00603747	-0.0366833	-0.067803
EF hand proteins	-0.0653425	-0.0486922	0.0260215	-0.128921	0.026994	-0.0257381	0.0473361	0.231649	-0.0446262	-0.0348457	0.0394157	0.00151547	-0.0433951	-0.0472608	-0.19525	-0.037063	-0.0322844	0.0908441	0.203237	-0.0206759	0.0860424	0.0404017	0.0703023	0.0613805	0.0634297	-0.126688	0.00120271	-0.151044	0.0325761	0.0985015	-0.117484	-0.0922249	-0.0549916	-0.160389	0.0667162	-0.0540174	0.142592	-0.0676912	0.129428	0.13885	0.0694903	-0.115135	-0.0275735	0.0816998	-0.161581	0.046149	-0.185061	-0.0286862	0.0534788
Eicosanoid metabolism	-0.0250972	0.0166972	0.0181469	0.0505049	-0.0268517	0.118084	0.0132966	0.0442704	0.169861	-0.080063	0.156383	0.184035	-0.0747205	-0.0646505	0.0214313	0.0390111	-0.069223	-0.373649	-0.0829505	-0.0163858	-0.0186443	-0.0613217	0.055008	-0.227942	-0.0720962	-0.115844	-0.0199716	-0.124154	-0.0035894	0.0943795	0.0747352	-0.344159	-0.0706551	0.043656	-0.0456139	-0.0640933	0.11475	-0.0381405	0.07667	-0.0151879	-0.0341035	-0.0212424	-0.0925692	0.223606	0.0702367	0.00062683	0.103214	0.041166	0.0278607
Electron carriers	-0.156776	-0.0138741	0.0721798	0.0495809	-0.0611912	-0.000458848	0.010868	-0.0572055	-0.0136505	0.0128435	-0.108122	-0.018831	0.0465648	0.0127184	0.016017	0.00955702	0.00466681	-0.0419632	-0.0436313	-0.0827374	-0.00996395	-0.0844844	-0.00927253	-0.0244234	-0.032402	-0.0273108	-0.0592154	-0.108781	0.0558388	0.0490278	-0.0256557	-0.0588067	-0.0851059	-0.0236821	0.0556537	-0.00572929	-0.0810192	0.00737616	0.00186144	-0.0174281	0.0456346	0.00970703	0.0886518	-0.0241643	-0.0598857	0.0255897	-0.00275687	-0.0259719	0.0150196
Fatty acid oxidation	0.0294809	0.175299	0.0513057	-0.0883327	-0.10071	0.0503475	-0.033319	-0.0278909	-0.0587019	-0.0242153	-0.0358484	-0.00302536	0.0159099	-0.0366056	-0.0479037	0.040582	0.0202905	-0.0842556	-0.101426	-0.0527611	-0.117296	0.0538804	-0.0205566	-0.0207582	-0.0299371	-0.110802	0.00109932	-0.00505916	0.0125568	-0.00680924	-0.0138675	0.0101901	-0.0844874	0.0462716	0.0316536	0.00343529	0.0565654	0.0141916	-0.0675965	-0.0167593	-0.0319859	-0.0409154	-0.0176147	-0.0753849	-0.0435774	-0.0421054	-0.0564268	0.0621827	0.0568135
Fe-S cluster biosynthesis	0.0488024	-0.0618116	0.0923821	0.0339731	-0.12916	-0.120993	-0.170781	-0.0169449	0.0399698	-0.00986835	0.133775	-0.0192466	0.114912	0.0467943	0.0243571	-0.0675164	0.00719209	-0.00778308	-0.014327	0.0201188	0.0708705	0.0624895	-0.161575	0.104595	-0.0945047	0.0129314	-0.107882	-0.146082	-0.112786	0.0203849	0.246492	0.00883194	-0.0505431	-0.183816	0.0539883	-0.0327456	0.0628145	0.0236085	-0.0484411	-0.0507732	-0.0242842	0.0170004	0.00573264	0.0072156	0.0566205	0.0224027	-0.0522356	-0.146022	-0.0120306
Fe-S-containing proteins	0.0123315	0.035057	0.218965	0.0610873	-0.0776003	0.0225374	-0.113701	0.0558758	-0.0657114	-0.0157328	0.0765502	0.0266595	0.0349773	0.101272	-0.0748982	0.0124662	-0.0459005	0.013943	-0.0362487	0.00182063	-0.0257031	0.0332251	-0.0112885	-0.0118001	-0.169204	-0.00994462	-0.0373146	-0.111411	-0.0842412	0.0145079	0.0519963	0.0923356	0.0662315	-0.0771904	-0.06881	-0.0496419	0.0327991	0.0416412	-0.0806375	-0.00887871	0.126102	-0.00200267	0.172674	-0.0992477	0.0162019	-0.0922023	0.0117757	-0.0250037	-0.0711211
Fission	0.049645	-0.135147	0.00570309	-0.0364851	-0.128338	-0.0346126	-0.161009	0.0477224	-0.0513539	0.0694874	-0.019301	0.0287447	0.0660858	-0.107849	0.0661642	-0.097691	-0.0438209	0.0415382	0.0754134	-0.0738234	0.0229852	-0.00925921	-0.0308971	0.0454719	0.0153907	-0.0718833	0.0270795	0.0274285	-0.052728	-0.178933	0.0560698	-0.00994695	-0.0307801	-0.144382	0.0217663	0.0417513	0.038444	-0.0258036	-0.00467705	-0.0474743	-0.00770159	-0.0474302	0.0379828	-0.146424	-0.0271055	0.110586	-0.243265	0.0861027	0.0573504
fMet processing	0.0461313	-0.0161763	-0.139145	-0.0757568	-0.073446	0.0655836	-0.0619122	-0.105687	-0.159147	-0.0631161	-0.0483703	-0.141809	-0.0555021	0.00493494	-0.0609702	-0.0311794	-0.185543	0.0120149	-0.0346655	-0.074726	-0.0614833	0.00354005	-0.0783503	0.0290092	-0.048144	0.115334	0.10914	-0.00707286	0.0419258	0.322561	-7.13985e-05	-0.0318176	-0.0837898	0.00218664	-0.101017	0.123836	0.103839	0.0430876	-0.184936	-0.0940999	-0.156244	0.107178	0.0419629	0.187908	-0.0996371	-0.18027	-0.130503	-0.0149115	0.0173369
Folate and 1-C metabolism	-0.0689613	-0.0477011	0.0571629	-0.201486	-0.00694209	-0.025418	0.0954669	0.0020663	0.038965	0.0595619	0.137573	-0.175574	-0.00961208	0.050634	-0.0702354	-0.0215726	0.126257	0.022498	0.00207542	-0.085698	-0.0152216	-0.0799958	-0.142561	-0.0512997	-0.0458917	-0.0344733	-0.0190333	0.021417	0.0131101	0.107834	-0.0153757	0.0294562	0.108544	-0.0578545	-0.00630492	0.0350457	0.0511894	-0.135742	-0.0140173	-0.0925274	-0.0623024	0.0871052	0.0473174	-0.0533894	-0.0186418	-0.0714369	-0.0886715	0.080799	0.0765486
Fusion	-0.00160713	-0.0379111	0.0744307	-0.00366706	0.145575	0.0852922	-0.155625	0.0750512	-0.107684	0.102657	-0.173157	0.0698123	-0.042299	-0.0848485	-0.0886876	-0.0223297	-0.0350812	-0.0294181	0.11264	0.165923	0.0569359	-0.0877948	-0.113139	0.0293914	-0.0832689	-0.0195685	0.243294	-0.0108313	-0.0231471	-0.0455464	0.0391596	-0.21416	0.032534	-0.0194532	-0.162671	-0.0908346	0.0353602	-0.216834	0.0762709	-0.0488057	-0.0253513	0.13554	-0.0363042	-0.122385	0.115242	0.0385105	-0.144238	0.160632	0.0142174
GABA metabolism	-0.0633659	0.0292011	0.0532796	-0.226102	0.000947701	-0.0400833	0.0979812	-0.0327527	0.0399478	-0.0347775	-0.00168135	0.055891	-0.0558502	-0.0062026	-0.0676026	0.0245508	-0.0672959	0.198312	0.0276298	-0.0215904	-0.0649234	-0.0633623	-0.00222231	0.0390805	-0.0164492	-0.0304407	-0.00690816	-0.0927076	0.0193792	-0.116798	-0.0796976	-0.0350942	0.0985061	0.114607	0.0326874	0.0966857	0.0264066	0.0904772	-0.0322253	0.049755	-0.150954	-0.0137599	-0.0913704	-0.0759036	-0.019542	0.0128104	-0.0157152	-0.0295638	-0.0884638
Gluconeogenesis	0.0168644	0.120892	0.156886	-0.0235791	0.00466863	-0.0888595	-0.0151317	-0.065099	-0.104047	0.0495026	0.127978	-0.0468629	-0.0309933	-0.0762215	-0.159426	0.00856281	-0.0289884	-0.0600521	-0.00225	-0.0458983	0.130617	-0.117794	0.0231848	0.0560121	0.035135	0.0981343	-0.0122681	0.0207022	0.0569446	0.0606466	0.0615354	0.00298657	0.0612523	-0.0427705	0.00828396	-0.008827	-0.0901954	0.0741787	0.0483662	-0.0660194	0.0465202	0.0382848	0.0513466	0.0255938	0.0423558	-0.0858011	0.00716168	-0.0211131	0.0465908
Glutamate metabolism	-0.0546121	0.0539486	0.0806415	-0.115305	0.0287657	0.0594853	-0.0412892	0.134967	0.0472625	0.110885	0.00695575	-0.243174	-0.0894319	0.0112169	-0.0492557	0.086988	-0.102239	0.0444222	-0.0112866	0.0581572	0.181762	0.130169	-0.0564519	-0.158682	0.0933024	0.00448558	-0.0436556	0.101256	-0.0208585	-0.153578	-0.107894	0.149203	-0.0886127	0.0969146	-0.0692806	0.0395929	0.00508687	-0.0501507	0.108862	0.0132916	0.00980398	0.0209155	0.0850195	0.0711492	0.0185179	0.0166781	-0.0658544	-0.0268386	-0.206297
Glycerol phosphate shuttle	0.028349	0.0148296	0.0269474	-0.00443427	0.223747	-0.0181473	0.130605	-0.0474579	-0.0222218	-0.0496497	-0.0254391	0.131144	-0.159733	0.0439734	0.0356827	-0.0126569	0.0512137	-0.00910011	0.0793051	-0.0263263	-0.0509265	-0.0178621	-0.185864	0.103939	-0.0445719	-0.189558	0.037282	0.102873	0.131957	-0.137034	-0.0234013	0.0448396	-0.064134	-0.0621678	-0.0535031	0.272715	-0.064417	-0.184483	-0.11268	-0.127277	0.243355	-0.11438	0.176831	0.265267	0.098268	-0.0338043	0.0693227	-0.0709193	-0.00156834
Glycine cleavage system	-0.0242261	0.105858	0.0730222	-0.064647	0.0428311	0.19365	-0.00048298	-0.0148616	0.122136	-0.0232233	-0.0589915	0.0202927	-0.005275	0.0457027	0.0726255	-0.102979	0.0594754	0.00790584	-0.0614389	0.0647072	0.114186	0.11745	-0.0811082	0.0351227	-0.152473	-0.0362309	0.12708	0.0150799	0.00303188	-0.0639793	0.146901	-0.0663895	0.0420973	-0.0765236	-0.19981	0.034732	0.096128	0.0377817	0.149794	0.233012	0.0304871	-0.184724	0.0607618	-0.0866152	-0.184966	-0.00172476	0.130536	0.01075	-0.0583187
Glycine metabolism	0.0332885	0.129106	0.0875785	-0.138175	-0.101816	-0.0273468	0.0434012	-0.0699024	-0.00713957	-0.0011466	0.0953513	-0.129353	0.0395601	-0.0125036	0.00658701	-0.0779943	0.0899653	0.0446271	-0.0926437	-0.0474358	-0.0229128	0.00662343	-0.0236196	0.0989896	-0.0876457	0.00775508	-0.13894	-0.0439481	-0.0355465	-0.0404264	-0.0121598	-0.0423117	0.0155936	-0.0824765	-0.131165	0.047749	0.0531547	0.0109722	-0.0132201	0.0231103	-0.0436165	-0.0369491	-0.0360562	0.0724996	-0.040001	-0.0206196	0.0301514	0.181946	-0.00968423
Glyoxylate metabolism	-0.000895067	0.0875325	0.157933	-0.0663118	0.0168542	-0.0355666	0.0472533	-0.132854	0.142256	-0.0439308	-0.0921195	-0.0848147	-0.0807938	0.0133105	-0.03756	-0.085159	0.0361566	0.0725942	-0.0354286	-0.0443924	0.103105	0.0412321	0.101326	0.190366	0.0273261	-0.0643577	0.0147192	-0.211816	-0.0559113	-0.0915137	0.0716651	-0.115714	-0.188103	0.0301093	-0.0721016	-0.0937542	0.067955	-0.132584	-0.142888	-0.0624247	-0.033708	0.0345268	-0.0559802	-0.0147325	-0.0728077	-0.09519	0.0419884	0.0146392	0.0761316
Heme synthesis and processing	0.0127918	0.122952	-0.0332803	-0.0493472	-0.102347	-0.0578107	0.0753651	-0.0365527	-0.00782986	0.17013	0.0562875	0.115878	-0.00181444	0.0953429	0.175258	0.101413	-0.0606095	-0.0991929	0.136252	-0.0346692	-0.0934974	0.0547159	-0.0727934	0.0620543	0.146776	0.0215287	-0.0024236	0.158456	-0.220732	0.21083	0.0147136	0.012179	0.0298067	-0.120416	-0.10421	-0.0691325	0.0281272	-0.0224834	0.0751886	-0.0144964	0.128283	-0.128619	0.0229721	-0.0996104	0.024659	0.0724082	-0.0211531	-0.0975212	-0.043129
Heme-containing proteins	-0.155383	-0.0527362	0.0776078	0.0340714	-0.0430363	-0.0198131	0.0482352	-0.0181679	-0.0102821	0.0663187	-0.0270124	-0.03082	0.0551082	0.0161074	-0.0131953	0.0082983	0.0103243	-0.036129	0.0158766	0.0711305	-0.0374395	0.0769071	0.106675	-0.0199638	-0.0130894	0.0735695	-0.020416	0.0564436	-0.0427166	-0.0464607	0.00945089	-0.0216968	0.0561685	-0.0626429	-0.00473781	0.0250974	0.0200728	0.0243695	-0.00439977	-0.0207975	-0.0730155	-0.0895649	-0.0334053	0.0219963	-0.011276	-0.0515601	-0.000876971	-0.0515371	-0.0152136
Immune response	0.0482671	-0.0202971	-0.120507	-0.0139868	0.0300899	0.0394885	-0.0131124	0.0578022	-0.0939944	0.0551802	-0.0824691	0.0422006	-0.0318389	0.153318	-0.114884	-0.0270016	0.267548	-0.187968	-0.0459682	-0.246818	0.0833631	0.266596	0.0550348	-0.0383574	0.115309	0.235882	-0.0552016	-0.0613189	0.157626	-0.0935275	0.0921086	-0.0298713	0.0297663	0.0540635	-0.0793782	0.0526541	0.160288	0.163476	-0.125139	-0.0464961	0.130952	0.0547447	-0.00480227	-0.0774698	0.205041	-0.00311813	-0.0116215	0.129932	0.0409372
Import motor	0.0626605	-0.01421	0.0795878	-0.0905835	0.0705128	-0.0438189	-0.124328	-0.0196376	-0.0514245	-0.0573033	0.117139	-0.116153	-0.0069962	0.103927	0.00929669	-0.22583	-0.0971286	-0.168762	0.117034	-0.205265	0.139362	-0.0845884	-0.0767266	-0.00710333	-0.0969314	-0.145446	0.11509	0.122053	-0.0623802	-0.0907471	-0.00919306	0.0644706	-0.0290245	-0.112998	0.103173	-0.128274	0.122389	-0.0189711	-0.0271868	-0.103384	-0.0291036	-0.0673033	-0.0856745	0.171673	-0.117559	0.0632274	0.216561	-0.032775	-0.0608671
Intramitochondrial membrane interactions	0.123941	-0.0147118	0.0585923	0.105735	-0.0325354	0.0739573	-0.133656	0.00762549	0.0197098	0.100075	-0.0162804	0.0421591	0.0489088	-0.06577	0.0140171	0.114604	0.0506194	0.0652217	-0.0100192	-0.00713912	-0.089633	-0.0744579	0.0189048	0.00203804	-0.0608495	-0.0626677	-0.0466403	0.066181	0.0151433	-0.0125737	-0.0505003	0.0502883	0.0586429	0.0505641	0.0354092	0.149116	0.269169	-0.0188006	0.0433284	0.0785055	0.0246349	-0.0520833	0.0999702	0.0400524	-0.0320746	-0.121833	-0.0799059	-0.00577817	-0.0350504
Iron homeostasis	-0.0415621	-0.0672046	-0.00544575	0.0849755	-0.156328	-0.146979	-0.0660335	0.0291414	0.112088	0.0484212	0.0021557	0.093381	-0.11485	-0.055322	-0.0965458	-0.0117058	0.0510857	0.0869464	-0.0706688	-0.140843	0.00126687	0.0785993	-0.132338	-0.0246727	-0.033236	-0.0505621	-0.0559938	0.000820865	0.0290457	0.0587924	0.142391	-0.118848	-0.109763	0.240449	0.0184316	-0.0183035	0.162354	-0.0725508	0.172636	-0.186119	0.04195	0.0348854	-0.00154799	0.0413404	0.094941	0.0141006	-0.0613942	-0.177975	-0.0267331
Itaconate metabolism	0.0405578	0.148151	0.0634262	0.0705104	-0.0423709	-0.0180633	0.0577833	0.045001	0.00800448	-0.0487336	0.0792565	0.104972	-0.0564591	-0.0694248	0.201592	0.0394616	0.126101	0.027979	-0.0454789	-0.00382019	0.102936	-0.0679967	0.0272371	0.11542	-0.0259381	-0.0290883	0.0872442	-0.0575154	-0.055297	0.0755817	-0.17757	0.0891108	-0.0979063	-0.0976855	-0.0640822	0.129768	0.0341003	0.0875163	-0.0470479	-0.137267	-0.0178644	0.0203811	0.0429261	-0.0343424	-0.0690791	0.0402416	-0.117425	0.0312948	-0.0889228
Ketone metabolism	-0.00127807	0.178944	0.0621221	-0.0696215	-0.0939985	0.0222585	0.0102809	-0.0979562	0.032138	0.0433413	-0.0557441	-0.0215097	0.00245517	-0.0447833	0.0216661	0.085754	-0.0249071	-0.0243544	0.0570957	-0.127381	-0.0765006	0.0731292	-0.00775928	0.0806315	0.0932361	-0.0295282	0.0406879	0.109991	-0.0469819	0.00365781	-0.00188721	-0.0161653	-0.0127533	0.0224983	-0.0150334	-0.0760846	0.0184063	-0.0224951	-0.0102818	0.0201838	0.00178118	0.0209818	-0.0463695	-0.0658694	0.0794209	0.0473823	-0.0283991	0.0276386	0.0866113
Kynurenine metabolism	0.0259362	0.105066	0.169703	0.0682908	0.0330643	0.0949571	-0.0652925	-0.0439044	0.092286	-0.0567385	-0.0309291	-0.0357145	-0.0697167	0.00279408	-0.022619	-0.0841825	-0.0648331	0.0373144	0.17821	-0.00658421	-0.0620437	0.00347828	-0.055455	-0.0669524	0.0752679	0.054451	-0.0657624	-0.12608	0.0874449	-0.00511935	-0.0128948	0.0699292	-0.085501	0.152783	0.0828419	-0.0428598	-0.013087	0.144425	-0.0188578	0.0461882	0.00392374	0.120163	0.085407	0.0255712	-0.0310327	-0.0494349	0.0277701	0.053013	0.0200524
Lipid metabolism	0.0140173	0.152159	-0.0298001	-0.0677156	-0.0942444	-0.0456908	-0.0408291	-0.0860833	0.0779807	0.0163729	0.0048811	0.152999	-0.0295814	0.189272	-0.060521	0.046402	-0.089163	-0.104501	0.123002	0.0892389	0.0299726	-0.0210408	0.0665398	-0.0444651	0.152487	-0.0110646	0.0111116	0.0276987	-0.130547	0.115003	-0.00639516	0.0198017	-0.000127605	-0.0810642	-0.0422187	0.0778787	0.0449851	-0.0377161	0.0230279	-0.0280173	-0.00482528	-0.019284	0.00243863	-0.0646885	0.0812425	0.0103908	-0.0234757	0.0213213	0.0269639
Lipoate insertion	-0.046508	-0.100723	0.049923	-0.103095	-0.0948187	0.0763491	0.0644	-0.0788273	0.0603356	-0.0528938	0.112371	0.0722741	0.0111614	-0.129246	0.0374528	-0.075154	-0.0156416	-0.0974621	0.0358041	0.115693	0.0685197	0.1393	-0.0848494	0.0506034	-0.11698	0.0231772	0.121762	-0.0901296	0.162199	0.180572	0.023622	0.0471126	-0.0322242	0.10921	-0.248906	0.13762	0.0944795	0.179362	0.215907	-0.0581208	-0.152349	-0.179199	0.0384895	-0.100924	0.132898	0.0551377	0.113077	0.0760821	0.0362453
Lysine metabolism	0.0222132	0.176336	0.0834547	-0.0680621	-0.066236	0.0759142	0.00606221	-0.0221941	-0.0284725	-0.0455567	-0.035568	-0.0467027	-0.0562866	-0.0126178	-0.0213922	0.0928833	0.0716227	-0.011437	-0.0832558	-0.00346691	0.00341821	0.028252	-0.0541233	0.0867069	-0.0648164	-0.0106492	0.0977971	0.0416914	-0.0853357	-0.0521384	-0.0318532	-0.0125852	-0.060941	0.0615887	-0.00699608	0.008964	-0.0627242	0.11085	0.0749581	0.0308226	-0.0757941	-0.0417562	-0.0541549	-0.0543519	0.0482748	0.0585004	-0.0299486	0.0164946	0.063603
Malate-aspartate shuttle	0.025705	0.111191	0.190658	0.080967	0.0573811	0.0361258	-0.0636659	-0.0461557	-0.0325104	-0.0456787	-0.0231687	-0.0317555	-0.0680749	0.0156643	-0.0439401	-0.0544607	-0.100973	0.0216087	0.112547	0.0408433	-0.0743787	0.0481	-0.0549187	-0.0725192	0.0192278	0.0748125	-0.0628265	-0.079895	0.0974154	-0.0375769	0.0257601	0.0369224	0.0185766	0.0766315	-0.0129464	-0.0331872	-0.0375323	0.0453563	0.0071408	0.00151723	0.00128455	0.06915	-0.0295003	-0.0132977	-0.0351337	-0.0676644	-0.0293018	0.0859888	0.0392847
Metabolism	-0.152059	-0.0517744	0.0953142	0.0213015	-0.077796	-0.0350369	0.0329695	-0.0210974	0.00383674	0.0614517	0.0064816	0.0073321	-0.00243818	0.0261029	-0.038952	0.0139005	0.0271869	0.000587769	-0.00284777	0.0251634	-0.016575	0.0827973	0.0582195	-0.0368196	-0.0224601	0.0527208	-0.0160181	0.044956	-0.0385916	-0.0123213	0.050634	-0.055142	0.0180471	-0.00411815	0.00432271	0.0102063	0.023229	-0.0107498	0.0176373	-0.0655357	-0.0423414	-0.0504171	-0.0262743	0.04013	0.0260162	-0.0110333	-0.0224127	-0.0862814	-0.0293221
Metals and cofactors	-0.151895	-0.057134	0.0849973	0.0409808	-0.0750258	-0.0400861	0.0306406	-0.0195937	0.00897728	0.067748	-0.00219281	-0.00115062	0.0174327	0.00898665	-0.0255856	0.015603	0.022785	-0.000755534	0.00461187	0.0210173	-0.0276196	0.0873402	0.064672	-0.0313485	-0.0245125	0.0569797	-0.0194088	0.0494655	-0.0365553	-0.0149651	0.0493266	-0.0517473	0.0168467	-0.00947054	0.00654381	0.00990888	0.0386066	-0.00263892	0.0291678	-0.0582275	-0.0499522	-0.0602289	-0.0315604	0.0350077	0.0237746	-0.0197906	-0.0195557	-0.0943178	-0.0194853
MIA40	0.0786796	0.0344372	0.00768709	-0.00574119	-0.09238	-0.0581651	-0.045086	-0.159326	-0.12332	0.128166	0.098056	0.161162	0.0562814	-0.0333897	0.115766	0.0470885	-0.0660584	0.146202	-0.127395	-0.0393455	0.171859	0.0952829	0.0821829	-0.0091039	0.0657078	0.0714454	0.095326	-0.179991	0.001469	0.0773176	0.00908627	0.158995	-0.0305395	0.00264382	0.085504	-0.0231479	0.0730485	-0.290456	-0.126283	-0.110557	0.0442926	-0.0105579	-0.017114	0.0334821	-0.0300761	-0.0387051	0.0742377	-0.025388	-0.0756113
MICOS complex	0.0210916	-0.00563903	0.218022	0.0161967	0.129143	0.00129285	0.0227113	0.025676	-0.10234	0.0287767	0.0811005	0.0774098	0.104286	-0.0702223	-0.0586244	-0.0281113	0.013749	0.00939653	-0.0195314	0.0518005	0.0356932	-0.0677726	-0.0339825	0.108615	0.0781487	-0.0692429	0.0488323	-0.0316366	0.113089	0.0118823	-0.0355809	0.030892	0.104747	0.0230607	0.0772619	-0.049235	0.0240114	0.021099	0.0583468	0.0018509	0.0731882	0.0979878	0.0469585	0.0662667	-0.00915531	0.128546	-0.00668024	-0.016357	0.0752704
Mitochondrial central dogma	0.144717	-0.087256	0.0986286	-0.0346903	0.0144069	-0.0327448	0.00398878	-0.0806339	0.0154787	-0.0218273	0.0184151	-0.0212559	0.0162954	-0.0201728	0.0222526	-0.0705095	0.00705564	-0.0299814	0.0120424	-0.0353352	0.0315249	-0.0150649	0.0139501	-0.0155355	0.00490377	0.062338	-0.0290973	-0.00285431	0.0116396	0.0494265	-0.0160225	-0.0182898	-0.027504	0.00140593	0.035013	-0.00922599	0.0122951	-0.0120213	0.0415417	-0.0245267	0.00789421	-0.0179212	0.0242987	-0.0213724	0.0134668	-0.0125875	0.0258495	-0.0192562	0.0187018
Mitochondrial dynamics and surveillance	0.00684906	-0.139367	0.0913794	-0.042348	-0.159307	0.0266254	0.0306288	0.174007	-0.0663886	-0.00942313	-0.00922747	0.0661873	-0.0814129	0.0943596	-0.0240435	0.0220104	0.0420439	-0.0292951	0.0333382	-0.0180776	0.0367548	0.0387577	-0.0361114	0.0632677	0.0327667	-0.0304448	-0.0403327	0.0471023	-0.0348987	-0.0974379	0.0416331	0.00196303	0.0157007	-0.00824798	0.0596987	-0.0602395	0.0280414	0.0289678	-0.0221573	-0.0175521	-0.0384983	0.030196	0.0252696	-0.00988419	0.0271403	-0.000131831	-0.00174383	0.025022	0.0345891
Mitochondrial permeability transition pore	0.0823076	0.0100894	0.00874441	0.176465	-0.0845504	-0.0867019	0.154511	-0.0390168	-0.0795927	0.0646544	0.118023	0.00834339	0.00780653	0.0273991	-0.0169394	-0.0210258	-0.0585927	0.0624235	-0.12631	0.0448415	-0.101153	0.0356788	-0.0207796	0.0564154	-0.0199663	-0.0105285	-0.168656	-0.0548534	-0.0192073	-0.0387697	-0.0378065	0.00601122	-0.0392798	0.0484989	-0.0503235	-0.0409452	0.0274443	-0.0123567	0.0741182	0.0840632	-0.100718	0.175107	-0.0199465	-0.0102509	0.0111178	0.0225981	0.113611	0.0752123	0.0182176
Mitochondrial ribosome	0.122483	-0.0552517	0.130918	-0.00194038	0.00182878	-0.0773814	0.0174651	-0.0891129	-0.0284663	-0.147385	-0.0260668	0.0640235	-0.0344687	-0.0449903	-0.0173932	-0.00992667	-0.0551791	-0.00414576	0.00854714	-0.13783	0.0561704	0.00315142	0.0626031	-0.0200994	-0.0726824	0.00277149	0.0420737	0.00302668	0.000563481	0.0426182	-0.0267045	0.0147036	-0.0156346	0.0259202	0.00548621	-0.0272462	-0.0409948	-0.0352429	0.0286822	0.0422087	0.0470512	-0.00272716	-0.0144856	-0.0843981	0.0687102	-0.0283266	0.0634887	0.0186397	0.0111424
Mitochondrial ribosome assembly	0.0437389	-0.152009	0.0958921	-0.113052	0.00955545	0.0863783	0.00896599	-0.0180764	-0.0224396	0.0484789	0.052204	0.0172956	-0.0457408	0.0280306	0.0237154	0.0804405	0.063554	0.0528329	0.111338	0.0752491	0.0157544	0.0734791	0.106765	-0.00375943	0.0635287	0.0204012	0.0725479	0.021561	0.0116107	0.000332873	-0.139785	0.0159669	-0.0896366	0.0357379	0.072373	-0.0369699	0.00275268	0.0117336	0.060949	-0.0817168	0.0315116	0.0408945	-0.0799677	-0.102552	0.0233584	-0.0680914	0.132271	0.0421168	0.029506
Mitophagy	0.00648711	-0.137752	0.0675174	-0.0315316	-0.124341	0.0538634	-0.0218442	0.111312	0.00758078	-0.081745	-0.0501364	-0.0503266	-0.212771	0.0232048	-0.05979	0.168654	-0.0599517	0.076116	-0.0226251	-0.0346571	-0.0924211	0.000688041	-0.00170729	-0.104313	-0.0337885	0.103297	0.0523946	0.0443168	-0.0706911	0.0711317	0.0662013	0.0247653	-0.0927896	-0.0536935	-0.0015152	0.0085875	-0.0674454	-0.0189164	-0.0256814	-0.0321449	-0.0129096	0.0123713	0.0925149	-0.00252484	-0.0849657	-0.00476058	0.217729	0.0476543	0.0119381
Molybdenum cofactor synthesis and proteins	0.0190717	0.073697	-0.0872586	-0.104569	-0.0909103	0.0489077	0.0195141	0.123432	-0.0377537	-0.109424	0.0532657	0.0504944	0.0736098	-0.156373	-0.0690974	-0.101207	0.168807	-0.146524	-0.0426087	0.102358	-0.0563167	0.0360417	0.174737	0.151769	-0.0442624	-0.197729	0.00984222	0.0279079	0.0124306	0.0858126	0.174988	0.292305	-0.118925	0.0408511	0.098194	0.104827	0.0497058	-0.00444811	0.015599	0.136678	0.108369	0.033836	-0.0958307	0.0260803	0.0317943	-0.0906635	0.142953	-0.0110975	-0.0469431
mt-mRNA modifications	0.0797789	-0.136309	-0.0144949	-0.0712838	-0.0722754	0.0374549	-0.0167413	-0.0242426	-0.0803206	0.12408	-0.08978	0.0714829	0.0894339	-0.0709108	-0.0015548	0.0466879	0.0390203	-0.00669608	-0.0330723	0.0843182	0.0404355	-0.0922239	-0.06123	0.0551558	0.080266	-0.0854547	0.132602	0.0671313	0.171373	0.131737	-0.154128	-0.0599174	-0.0360599	0.00130777	0.0804313	0.0117196	0.00611637	0.0558078	-0.00932378	0.0684949	0.0201353	-0.0139992	0.0346447	0.0590197	-0.0268808	-0.0921558	0.00336016	-0.0257411	-0.00670322
mt-rRNA modifications	-0.000723036	-0.160996	0.105189	-0.0704911	-0.00678285	0.0554637	0.0296016	-0.0830906	-0.0408193	0.0104843	0.0838337	0.0131875	-0.0704443	-0.0264969	0.0165496	0.0862414	0.0269897	-0.0167002	0.100483	0.112707	0.0150204	0.0960714	-0.00323054	0.044801	0.116628	-0.025863	0.0850013	0.0460147	0.140367	0.046095	-0.0607744	0.0387756	-0.108784	0.0733768	0.101291	-0.0423871	-0.0271527	-0.057984	0.0705456	-0.128121	0.0250671	0.0507784	-0.0359706	-0.0742036	-0.032282	-0.167903	0.0351738	0.0771838	-0.149139
mt-tRNA modifications	0.145364	-0.0583571	-0.0631009	-0.0606273	-0.0270676	0.06968	0.0459292	-0.044899	-0.0180716	0.0318465	-0.0674817	-0.0611853	0.0257926	0.0528634	-0.00838125	-0.0839444	0.0266479	-0.0243814	0.0108253	0.0473036	-0.00832857	0.0452131	-0.0162593	-0.0583143	-0.0488274	0.078588	-0.0329559	-0.00910096	-0.0238978	0.110705	0.0366682	-0.0366587	-0.0690913	0.075812	0.053177	0.057852	-0.0392899	-0.0368234	-0.0669826	-0.0378323	-0.0488513	-0.0146855	0.0266295	0.0483315	-0.102111	-0.067751	0.0443197	-0.0528662	-0.0812631
mt-tRNA synthetases	0.121167	-0.0170001	0.0346661	-0.00870829	0.0813667	-0.0826939	-0.0479029	0.0297778	0.1501	0.104463	0.0625345	-0.151598	0.0708161	-0.0286698	0.0338064	-0.139722	0.0727844	0.0272753	0.0142383	-0.0336484	0.0329591	-0.155168	-0.0176772	0.0126307	0.113876	0.0575544	-0.128118	-0.0206109	0.0147551	0.0453575	-0.0118805	-0.0290454	0.0469948	0.0268878	0.0781544	0.0383928	0.143545	0.0648162	0.152669	-0.0425207	-0.0395105	-0.0845676	0.118859	-0.00168465	-0.0236662	-0.0120561	0.156981	-0.0617192	0.151949
mtDNA maintenance	0.142911	-0.0598829	0.0306044	-0.0347396	0.0671383	-0.00312982	0.0948729	-0.147358	-0.0255238	0.00762963	-0.0744028	-0.00346571	-0.0242798	0.0277525	-0.000791514	0.0320069	0.0100227	-0.0384537	-0.0297823	0.0952571	-0.0626324	0.0459053	-0.0213858	0.0623642	-0.0311999	-1.30048e-05	-0.0637617	-0.0764575	-0.0240904	-0.0292733	-0.0334245	-0.0282052	-0.0370102	-0.038398	-0.0768372	-0.0563536	-0.0054805	-0.0776525	0.011257	0.0406738	-0.00654109	-0.0198572	0.0360956	0.0414247	-0.00723945	-0.0409103	-0.100747	-0.0581355	-0.0434749
mtDNA modifications	0.0746265	-0.0617842	-0.080554	-0.0337626	0.0853783	0.122049	0.0523144	-0.0551127	0.0791975	0.0792506	-0.0238674	-0.118956	0.0547023	0.113541	0.0381681	-0.00625972	0.19591	-0.00591912	0.00774147	-0.137121	-0.113175	-0.168653	0.065928	-0.0248353	0.026296	-0.000300521	0.0555582	-0.0137156	-0.0767114	-0.0825493	0.114149	0.0634243	-0.075192	-0.073889	-0.0399237	-0.103371	-0.00233285	0.00735161	0.302267	-0.216244	-0.209291	0.0289822	0.119348	0.189022	0.136588	-0.148971	-0.0842882	0.0535016	-0.335201
mtDNA nucleoid	0.147889	-0.043906	0.0457141	-0.0485037	0.0635357	-0.036375	0.034851	-0.134135	-0.0682676	-0.0259217	-0.0338635	-0.0161226	5.48869e-05	-0.0496819	-0.00534775	0.0306048	-0.0622017	-0.0564325	-0.0220938	0.0538499	0.0294313	0.0901166	0.0358645	0.0241161	0.031884	0.0493084	-0.0555909	-0.033766	0.0142147	-0.0146723	-0.0459433	0.00588277	0.0231293	0.0369433	-0.00231482	-0.0299674	-0.0126393	-0.087325	0.0631285	0.0141299	-0.0559286	-0.0359242	0.0463527	0.0144792	-0.0506502	-0.0183828	-0.0774533	0.0888537	0.0125826
mtDNA repair	0.138175	-0.0697606	0.0289068	-0.0187708	0.0288218	-0.0509473	0.131378	-0.0747393	-0.00295973	-0.0219744	-0.0446061	-0.0114821	-0.045581	0.0239453	-0.015569	0.0364345	0.0626096	-0.0194579	0.0260321	0.110627	-0.0703656	0.0143499	0.0217575	0.14209	-0.042925	0.0095389	-0.0247865	-0.0608783	-0.0801647	-0.0508789	-0.00419721	-0.0425616	-0.0904287	-0.115529	-0.0981341	-0.0756916	-0.0478132	-0.0957122	-0.0316447	0.0500306	-0.0479728	-0.0561978	-0.0187422	0.00571779	0.0265802	-0.175951	-0.119711	-0.100307	0.0104433
mtDNA replication	0.148252	-0.0608896	-0.0165447	-0.0383897	0.040628	0.0214454	0.0488906	-0.132837	-0.0287211	0.0410881	-0.069076	0.0147888	-0.0079183	-0.012343	-0.0199349	0.0299123	0.0172148	-0.0496241	-0.0453733	0.0784573	-0.00839146	0.0591536	0.0228155	0.0480063	-0.0320119	0.0204566	-0.0823283	-0.0785036	-0.0410172	0.00556275	-0.0940715	-0.0443424	-0.023302	-0.0556096	-0.0137671	-0.0541219	-0.0513638	-0.0637212	0.0601455	0.0611782	0.00182389	-0.016101	0.0507831	0.0948419	-0.0497203	0.112401	-0.0674201	0.0168602	-0.0881394
mtDNA stability and decay	0.0300188	0.00882203	0.019544	-0.0110706	0.142127	0.146794	0.0682044	-0.177822	-0.0924896	-0.00675334	-0.144599	0.0622559	0.0222437	0.12476	-0.0605945	-0.0508888	-0.0668217	0.00608909	0.0658316	-0.00767021	-0.179299	-0.0582852	0.0818495	-0.169439	-0.0636288	-0.126728	-0.128053	-0.0892922	0.106486	-0.026921	-0.0317743	0.184547	-0.116236	-0.0672754	-0.149174	0.00601454	0.230535	-0.00152896	0.0846667	-0.0897564	-0.00640073	0.0870534	-0.0682286	-0.0710926	0.164526	0.209776	-0.0855861	-0.189969	0.0331187
mtRNA granules	0.153088	-0.0628353	0.0842351	-0.0199524	-0.0239636	0.0134764	0.0132738	-0.028443	0.000423293	0.0458063	-0.0368745	0.00319068	-0.00515348	0.0299876	0.0137853	-0.0364588	0.052918	0.0403251	0.0762385	0.0476851	0.0337246	0.0750299	0.0646857	-0.0521899	-0.0680788	0.071324	-0.0850166	0.00611907	-0.0216329	0.060597	0.0109858	0.0093467	-0.0589303	-0.0148713	0.0851179	-0.002685	0.00309679	-0.0181813	-0.0123473	-0.0135163	-0.0541145	-0.0775576	-0.100423	-0.116053	-0.0521731	0.026669	0.0459725	-0.0729572	0.0242059
mtRNA metabolism	0.112053	-0.132316	0.0810384	-0.0625156	-0.0350258	0.051965	-0.000569369	-0.071681	-0.0158192	0.0775341	-0.00661966	0.0353859	-0.00414942	-0.00920782	0.0417538	-0.0140359	0.0692733	-0.0105112	0.0513139	0.0883237	0.0296711	0.063087	-0.00489428	0.00149563	0.00907596	0.047671	-0.03917	0.0421462	0.0242904	0.0726469	-0.0388498	-0.086602	-0.073118	0.0287978	0.0717923	0.00970839	0.0136242	-0.0165748	-0.0161181	-0.0231175	0.0160717	0.0286043	-0.0556422	-0.00721134	-0.0859509	-0.00205431	0.0334025	-0.0203794	-0.0937591
mtRNA stability and decay	0.0931628	-0.100695	0.115502	0.0143338	-0.0611519	0.0569359	-0.0357367	-0.0229218	0.0639201	0.10423	-0.0116226	0.0516601	-0.0191984	-0.0473047	0.111932	-0.0120212	0.114846	-0.0501772	-0.00900295	0.111601	0.026794	0.0339027	-0.0887512	0.00486058	-0.0560395	0.0745742	-0.175023	0.0587462	-0.00439678	0.0542209	-0.0406113	-0.172647	0.0167453	-0.0166247	0.11676	-0.000450566	0.128738	0.0158441	-0.103573	0.0819104	0.0440574	0.0523939	-0.19501	0.0609138	-0.0720512	0.100051	-0.0144164	0.0410087	-0.174216
NAD biosynthesis and metabolism	0.0255243	0.00532149	0.0202622	-0.0808908	-0.110911	0.143004	-0.0484225	0.0602557	0.140521	0.125556	-0.0231427	-0.157528	0.135788	-0.142056	-0.0764024	-0.0272636	-0.164855	-0.0323484	0.11788	0.112212	-0.107458	0.128158	-0.0167914	-0.0525028	-0.013055	0.0999394	0.0589705	-0.0689589	0.177802	-0.000840314	0.0400519	-0.0724893	0.123154	-0.213653	-0.114335	0.0842564	-0.0794026	-0.0413754	-0.0843711	-0.0657983	0.122886	0.213809	-0.0547611	0.0570827	0.0869396	0.151816	0.087542	-0.193821	0.00622621
Nucleotide import	0.0787063	-0.0264562	-0.0593472	0.0993908	-0.140571	-0.143675	0.151207	0.0308761	-0.0933879	0.0561587	0.0626408	0.0271946	-0.0323939	0.035646	0.0403871	-0.0983884	-0.0550643	0.107078	-0.10499	0.028539	0.00138981	-0.0596664	0.0426124	0.0444635	0.0214402	-0.00174701	0.0103131	-0.058666	-0.0145912	0.0134066	-0.0124384	-0.0242008	-0.0388925	-0.125851	0.020731	0.0596226	-0.0438027	-0.0533968	0.111177	0.0946023	-0.0172084	0.125233	-0.102037	-0.0482161	0.0800218	0.0334939	0.103438	0.0203366	-0.0881261
Nucleotide metabolism	0.0586867	0.0193017	-0.000108279	0.021623	-0.171343	-0.0389664	0.194438	0.0319841	-0.164958	-0.0499814	-0.097428	-0.0473676	-0.00378651	-0.0021929	0.106391	-0.0721971	-0.120106	0.101437	-0.127762	0.0406024	0.0904874	-0.108467	-0.000618395	-0.111283	0.138025	-0.154245	0.0223778	-0.00515511	0.0896619	-0.0647992	-0.0573196	-0.0241387	0.0871816	-0.108194	-0.0970791	-0.0297762	0.136036	-0.0139346	-0.0455814	-0.0723989	-0.0793254	0.0813758	-0.0728782	0.0307082	0.0184637	0.0311195	0.105086	0.0546643	0.00654383
Nucleotide synthesis and processing	0.0672076	-0.0290501	-0.00597928	-0.0346748	-0.0697131	0.0129797	0.188639	0.115455	-0.0809861	-0.100476	-0.262963	0.0462892	0.00890049	0.0264874	0.118587	0.0961096	-0.026531	-0.108147	-0.00854183	0.0390335	0.0841097	-0.147799	-0.0120932	0.0695352	0.0245964	-0.0195672	-0.00929904	0.14276	0.0686686	-0.0490969	0.128269	0.0985527	0.0306829	-0.108975	-0.0432414	-0.0762239	0.0751023	0.100124	-0.0370963	-0.165579	-0.168453	0.0682198	-0.0646192	0.105974	-0.0659722	0.114948	0.0202787	0.033751	0.184848
Organelle contact sites	-0.0206002	-0.141014	0.079908	-0.0459165	-0.0982097	0.0570989	-0.0758305	0.0798124	-0.101566	0.0608055	0.0837299	0.0601418	-0.156811	0.000405684	0.0513616	0.0902311	-0.0809323	-0.0403153	0.089952	-0.018532	-0.00291482	-0.0226334	-0.0643132	0.0225945	-0.104268	-0.0102204	-0.0456183	-0.00373192	0.0287864	-0.0964027	0.165013	0.00558177	0.00259955	0.0562033	-0.00647608	0.0498714	-0.0315312	-0.112049	0.0244584	-0.020421	-0.00684418	-0.110735	0.142324	0.0214632	-0.0673731	0.192335	-0.0540864	0.224369	0.0488233
OXA	0.0819119	-0.0136182	0.0413356	0.144445	-0.161336	-0.110665	0.00351163	0.0170555	-0.00233905	-0.0276431	0.0232846	-0.0479092	0.117401	-0.0650436	0.0280551	-0.163039	0.0995019	-0.0464477	0.0973837	0.0284947	-0.130017	-0.00617062	0.0355751	0.0226612	0.0705065	0.0363481	0.0506159	-0.033525	0.0856327	-0.0549797	0.0308024	0.00111687	-0.110201	0.0571552	-0.011581	0.173965	-0.056899	-0.0384681	-0.0332214	-0.0192256	-0.00785311	0.00101557	-5.38773e-05	-0.0338395	0.0854785	-0.0597955	-0.125337	0.0166692	-0.0727586
OXPHOS	-0.158336	-0.0426175	0.0851462	0.0284971	-0.0302265	-0.0348207	0.0429336	-0.0318717	-0.0272125	0.0485854	-0.0777533	-0.0250671	0.0645824	0.0111595	0.00633165	-0.0224842	-0.0103738	-0.0728395	-0.0113163	0.0394766	-0.00498286	0.0272776	0.0685425	0.00387806	-0.000983514	0.0427941	-0.00346507	0.0166475	-0.0265893	-0.0206155	-0.0330088	0.012829	0.00224771	-0.0218408	0.00450983	0.0443425	0.027441	-0.0039271	0.0101051	0.0215323	-0.00811924	-0.0372506	0.038984	0.0424549	-0.00197521	-0.0262664	0.0104405	0.0221414	-0.020258
OXPHOS assembly factors	0.0254046	-0.127359	0.123096	-0.0533102	-0.0211437	0.115014	0.042144	0.0921646	0.0764045	0.014267	0.0507736	0.120225	0.144114	0.0429298	0.00157882	-0.0114599	-0.148774	0.0124262	-0.1141	-0.163206	0.0128578	-0.0390923	0.039032	0.0387216	0.0133911	0.0136973	0.0107127	0.0767332	0.0412738	0.0489622	0.0564097	0.107608	-0.0188157	0.0260526	-0.0814141	-0.0341857	-0.0848293	-0.0331263	-0.0516341	0.034681	0.00972259	0.000949871	-0.121329	-0.0309485	0.0273699	-0.0429341	-0.0719618	-0.0669925	-0.083115
OXPHOS subunits	-0.158244	-0.0423762	0.0846512	0.0293736	-0.0303024	-0.0355674	0.0427306	-0.0317546	-0.0267394	0.0491359	-0.0788783	-0.0255169	0.0653116	0.0104867	0.00655842	-0.0227753	-0.0107436	-0.0733208	-0.0109115	0.0405115	-0.00553928	0.0270366	0.06898	0.00400077	-0.000605456	0.0432441	-0.00381739	0.0165183	-0.0263237	-0.0211541	-0.0337808	0.0133111	0.00272434	-0.0222236	0.00471562	0.0449611	0.0281325	-0.0032938	0.0108362	0.0218562	-0.00855564	-0.037344	0.0398871	0.0427658	-0.00236502	-0.0267238	0.0112034	0.0228189	-0.0202874
Phospholipid metabolism	0.0223562	-0.0126788	0.0238086	-0.0722413	-0.00462443	-0.024452	-0.164212	-0.0133008	0.13748	0.040818	-0.0137465	-0.0390896	-0.297449	0.194823	0.0904513	-0.141169	-0.00955786	-0.147796	0.0361305	0.10823	0.052299	-0.124225	0.286068	-0.0265311	0.154535	-0.119061	0.0564513	-0.0831515	-0.0104005	0.0608255	-0.0104137	0.0349958	0.120398	-0.0715383	-0.0982765	0.108847	0.0246792	0.0142918	-0.0208893	0.0669766	0.0108823	0.137511	-0.0725618	-0.0598099	0.100885	-0.170496	-0.0741712	0.0145037	0.0771065
Polycistronic mtRNA processing	0.142385	0.00333802	0.0333789	-0.0330913	0.0898035	0.0641788	0.0162957	-0.0234674	0.0537743	0.061969	-0.165332	-0.0172186	0.0376098	0.0722507	0.00134976	9.90829e-05	0.045671	0.0667694	0.00348072	0.0351937	-0.0264067	-0.0339649	0.0879835	-0.152039	-0.0695358	0.129522	-0.0528654	0.0417764	0.0384685	0.0519678	-0.050129	0.00967368	-0.0228612	-0.0631592	0.0636264	-0.0123977	0.019057	-0.0345904	0.0831008	0.0471631	-0.0685192	-0.00366208	-0.0983504	-0.116247	0.00899042	0.0369538	0.113277	0.0849393	0.0336874
Preprotein cleavage	0.077219	0.0906013	0.151209	0.107131	0.0215917	0.0697768	0.0212695	0.0775046	-0.0560969	0.0129624	0.119175	0.00930926	0.0280367	0.0183409	0.0249266	-0.0464997	0.0588051	-0.0513849	0.0867724	0.107315	-0.0805592	0.00599691	0.0847023	0.0656244	0.0137922	0.0270037	0.012451	0.0313518	-0.110417	0.00332502	-0.0136568	-0.0882607	-0.018805	0.0368982	-0.0779436	0.04147	-0.0216185	0.0214925	-0.0571083	-0.0721515	0.0821155	-0.0476565	-0.0235467	-0.00300846	0.0188336	-0.0658035	-0.0281569	-0.0428163	0.0912289
Proline metabolism	0.00743024	0.0693159	-0.037135	-0.0484528	0.0390952	-0.123348	0.0856252	0.04614	-0.0523909	0.184369	0.170282	-0.0198404	-0.0664008	0.00451474	0.13852	0.155953	-0.102253	-0.15378	-0.0334863	0.164247	-0.0510723	-0.255659	0.0286387	-0.130916	-0.153919	0.100824	0.0822156	-0.0681971	-0.148553	-0.0547984	0.0454714	0.0387811	-0.00663191	0.0487179	0.153989	0.0522132	0.132477	0.173539	0.0733381	-0.0753756	0.232619	0.132602	-0.0651874	-0.0574146	-0.0216856	0.00451149	-0.123152	0.018804	-0.0370224
Propanoate metabolism	0.035882	0.0539801	0.00520152	-0.0598654	-0.121081	0.0299546	0.0373978	-0.0411123	0.218139	-0.163223	0.119107	0.048998	0.0773394	-0.197491	0.0571172	0.045022	-0.116185	-0.196268	-0.0625293	-0.0442943	0.0203545	0.0771383	0.0433204	0.000345341	0.0210931	0.00718188	-0.125365	0.0247111	0.0686804	-0.128893	-0.228306	-0.11514	0.141093	-0.206768	0.0269899	-0.000453663	-0.0920091	-0.0254938	0.0190621	-0.0646716	-0.064629	0.0501028	0.0925024	0.0213405	-0.0384358	-0.0545596	-0.103951	0.105869	-0.0559778
Proteases	0.141949	-0.0397093	-0.010972	-0.0171932	0.0174602	-0.0243312	-0.074211	0.0173609	0.0716185	0.176482	-0.121771	-0.0381428	0.119574	-0.00223386	-0.0234433	0.0595746	-0.00101796	-0.00374086	-0.0454136	-0.0115755	0.0329431	-0.0649868	-0.0433377	-0.0493678	0.0133676	-0.0315336	-0.00747334	-0.0594966	0.0499861	0.0101093	-0.0495697	0.0310109	-0.0286474	0.0731744	0.0224626	0.0527613	0.039726	0.0775672	0.097154	0.0325429	0.114487	-0.0219527	0.0203229	0.0421585	-0.00633209	-0.0146767	0.0605382	-0.0245734	0.0939545
Protein homeostasis	0.117474	-0.0563796	0.0792922	-0.0621239	0.0126358	-0.150216	0.0149099	-0.00265661	0.0939903	-0.0668101	-0.0659059	-0.0669383	0.0613583	0.0450226	0.0257677	0.129695	0.0287939	0.0227763	-0.0639163	0.0233575	0.00187469	-0.0615412	-0.0441779	-0.0738438	0.124289	0.0303087	0.0214485	-0.0827773	0.0625424	0.0610079	0.062506	-0.00672895	0.0856495	0.0875558	0.00766436	0.0838464	-0.0215302	-0.0193652	0.00639105	0.0478029	0.0897216	-0.194087	-0.0590289	0.0862509	0.0456995	0.0580099	-0.0387014	0.0884146	0.0215137
Protein import and sorting	0.101099	-0.100409	0.151573	0.0334457	0.00647671	-0.0458611	0.0663923	0.0270913	0.0391528	-0.0542232	0.00111869	-0.0352312	-0.0297734	-0.0486449	-0.0285161	-0.063634	-0.0302657	-0.061318	0.0365654	0.0360682	-0.115703	-0.0128886	-0.0193325	-0.0417022	0.047848	0.0319093	0.0868812	0.0669201	-0.169422	-0.0566116	-0.0147427	0.0183517	-0.124728	-0.0301321	-0.0124797	0.0815521	0.0943932	0.0069685	-0.130457	0.0610724	-0.0536726	0.01009	0.0572727	0.0330341	0.0804753	0.00700733	0.0431239	-0.0727634	0.0386305
Protein import, sorting and homeostasis	0.112562	-0.0763147	0.138568	-0.0289348	0.0216759	-0.126124	0.0398498	0.0304435	0.0665407	-0.0747843	-0.0222686	-0.0566037	0.0115402	0.00108509	0.0177339	0.0423194	0.0122719	-0.0226196	-0.018183	0.037735	-0.0697197	-0.0557184	-0.0411022	-0.0664527	0.0934485	0.0473755	0.0351933	-0.0448825	-0.0324732	0.0356029	0.0407633	0.0039531	0.0155424	0.0288454	-0.00458861	0.10187	0.0169773	-0.0292768	-0.0639324	0.03696	0.0294174	-0.121582	0.000619408	0.0506843	0.061636	0.0373509	-0.0122447	0.0115725	0.0259
Pyruvate metabolism	0.0319905	0.0321656	0.0737047	0.093318	-0.151083	0.134341	-0.0881067	0.0493149	-0.168492	-0.107262	-0.0288836	-0.0201804	0.0364943	-0.0778378	0.0359185	-0.0129891	0.0990632	-0.11946	0.128706	0.124361	0.039115	-0.0844526	-0.0411505	-0.138549	0.129547	-0.0839581	-0.022187	-0.0069423	0.0132088	-0.0214948	0.0392905	0.0926346	-0.0295064	-0.0128358	0.0786798	-0.208192	-0.0910906	0.0447501	-0.082974	-0.0335065	-0.09136	-0.0430918	-0.0042551	0.0392577	0.114693	-0.00768108	-0.0261291	0.00570934	-0.0384031
Q-linked reactions, other	0.0356463	0.151309	0.0720736	-0.0754271	-0.033926	0.00676269	0.0682015	0.0499322	-0.0985492	0.0100712	-0.0360174	0.159521	0.0415187	0.0660745	-0.0283467	-0.0467938	0.0881729	0.0130866	0.0144817	-0.0984087	-0.103301	0.0629748	0.0167979	-0.0218211	-0.105006	-0.0817475	-0.0635456	0.178736	-0.0336956	0.00895051	-0.171218	-0.111559	-0.0132304	0.104355	0.0660822	0.118127	-0.0917985	-0.0964259	0.0433711	-0.113536	0.0673971	-0.0316595	-0.00740099	0.127924	0.136094	-0.0259593	0.0708014	0.07432	-0.0434221
Respirasome assembly	-0.0022226	0.0288533	0.0714764	0.0689558	0.0458615	-0.177966	-0.0156604	0.193216	0.114739	0.0543574	-0.157983	0.0852552	0.0889323	0.0336551	0.0125009	-0.0942957	-0.148908	0.0231926	0.0122858	-0.176426	0.0267418	-0.0743015	-0.0965541	0.0359817	0.0511828	0.0646037	-0.0784531	0.161755	0.0708847	0.146918	0.0534259	0.0763411	-0.012681	0.0105615	-0.157603	-0.0235889	0.0503608	-0.0111912	0.0371782	0.102859	-0.125337	0.0442655	-0.0986898	-0.0102815	-0.0450686	-0.109226	-0.151621	0.0725107	-0.137178
ROS and glutathione metabolism	0.00621987	-0.0101354	0.0253495	-0.0794675	-0.138163	-0.0728058	-0.195869	-0.0288841	0.109714	0.0703003	-0.0540804	0.103675	-0.179217	0.18608	-0.0345042	-0.159439	-0.00593618	0.00571864	-0.17677	0.120944	-0.157005	-0.0266631	0.0844022	0.0523476	0.00154958	-0.0621069	0.0406144	-0.0319663	0.0432812	-0.0597118	-0.0938496	0.0226596	0.141339	0.0868481	0.00257945	-0.0664095	-0.0577669	0.00175546	-0.00791009	-0.0705056	-0.00743263	0.0128767	0.0439708	0.0978641	-0.0692637	0.0472506	-0.00116772	0.00893962	-0.0472497
SAM	0.0861593	-0.0504736	0.036882	0.0577765	-0.0470008	0.0597527	-0.127661	-0.0273752	0.0324176	0.0620413	0.0773537	0.0697387	0.0323865	-0.154593	-0.0872355	0.242799	-0.0226571	0.12165	-0.0583703	0.0300036	-0.0644576	-0.0380307	0.246983	0.0629246	0.0038331	-0.0282313	-0.107916	0.241464	0.117671	0.0288228	-0.00396158	0.0214782	0.0849677	-0.0641192	-0.0923538	0.0909062	0.27087	-0.00313563	-0.0988729	0.0382808	-0.103083	0.0422939	0.277176	0.0871951	0.0173756	-0.036726	0.00499006	0.0489564	0.156048
Selenoproteins	0.0157822	-0.0179673	0.0564085	-0.0973065	0.0984538	-0.129719	-0.183707	-0.0512723	0.0366423	0.173664	0.0259527	0.0509623	0.0230044	-0.0804542	-0.0864843	-0.0777182	0.00375321	-0.0295056	-0.240022	0.0679603	-0.0457365	0.0708732	-0.0390985	0.00518909	0.152982	-0.00638439	0.0848555	0.0902719	0.0292097	-0.0795905	0.0092746	0.0894388	-0.232228	0.0735215	-0.000552791	-0.0482473	-0.0271168	0.214762	-0.0243461	-0.0450784	-0.0999365	-0.0545569	0.0429266	0.068445	-0.0133406	0.287301	-0.140451	-0.0653115	0.0558781
Serine metabolism	0.0167092	0.1	0.0017926	-0.145071	-0.128525	-0.0188024	0.0911179	-0.140431	0.0769138	0.0690886	-0.0610413	-0.100636	0.0576052	-0.0389134	-0.0345895	0.0195925	-0.052748	-0.00566045	0.197017	-0.132935	-0.15791	0.0717979	-0.0214664	0.0991149	0.0730824	-0.045841	-0.0803499	0.013846	0.0438175	-0.0542454	0.13542	0.0523445	0.118188	0.100309	0.0427793	-0.110775	-0.00288371	-0.0813578	-0.00890148	0.0836705	0.0244755	0.0384183	-0.00535066	0.0591868	0.00849013	0.000760048	0.0800261	0.0787618	-0.0371601
Sideroflexins	0.0198381	-0.053978	-0.0419145	-0.072761	-0.0360641	0.145461	0.240784	0.00440583	0.0608817	0.0208964	-0.043144	0.0251723	0.00489137	0.103746	0.0491976	0.18784	0.0105341	-0.0545447	0.109361	0.060319	0.00933929	-0.0482648	-0.0327041	-0.0291495	0.0737031	-0.174228	-0.095318	-0.207227	0.035507	0.108322	0.129993	-0.0209909	0.0787099	0.155449	0.112895	0.0249271	-0.000453148	0.113029	-0.0739185	0.0200724	-0.0892851	0.0463836	0.134158	0.0268919	-0.146852	0.0923723	-0.138591	-0.0756562	-0.0216709
Signaling	0.100903	0.000618827	-0.00439388	0.143588	-0.0106999	-0.0520492	0.105886	0.114768	-0.104496	0.0635302	0.0649125	-0.0344096	-0.0630839	0.118604	-0.179317	-0.0180212	0.0531241	-0.0990759	0.00682218	-0.128555	-0.00132158	0.202179	0.0870311	-0.025704	0.0678602	0.00704229	-0.0125642	-0.0791905	0.111908	-0.0135621	-0.0643587	-0.0373919	0.000843142	-0.0304188	-0.0233782	0.00356492	0.125235	0.000959616	0.0305752	0.0296183	0.0469834	0.0328682	-0.00579799	-0.0230639	-0.0629319	0.087047	-0.0540251	0.0902969	0.0109528
SLC25A family	0.101011	-0.0336709	-0.0341435	0.107899	-0.106147	-0.0736154	0.172347	0.00430299	-0.0193721	0.0948244	-0.00535287	-0.0577228	-0.0405749	0.033597	-0.103605	-0.0418273	-0.148563	0.00768711	-0.118811	0.0227603	-0.0182895	0.0761519	-0.0283587	0.000861198	-0.0662313	-0.0602491	0.157617	-0.0216411	-0.0211013	0.0170883	0.0983505	0.0633496	0.0616875	-0.0287774	-0.0782284	0.0299628	-0.0992206	0.0835291	0.17336	0.0194372	-0.0207533	-0.011388	0.00336974	-0.00909308	0.0116747	-0.0656899	0.0636677	0.0388257	0.000441357
Small molecule transport	0.114664	-0.0251752	0.0176487	0.107068	-0.111148	0.00855427	0.120622	0.0896085	-0.0258533	0.128245	0.0255701	-0.0591166	0.0237254	0.0548876	-0.117825	-0.070181	-0.13087	-0.0567842	-0.0181684	0.0461199	-0.0103796	0.022054	-0.0150917	0.0340902	-0.0607523	-0.0915578	0.10025	-0.0485613	-0.00861028	0.0165656	-0.0198392	0.011564	0.0697528	0.0997563	-0.0698786	0.0323179	-0.195713	0.055778	0.0940631	-0.0285375	-0.0368437	-0.0777137	0.0487597	0.0312413	0.0279671	-0.00554315	-0.00135067	0.0319981	0.0250394
Sulfur metabolism	0.0562321	0.131206	0.0311014	0.0335743	-0.0498229	-0.0715508	-0.0346443	-0.0311023	0.0688923	-0.0225464	-0.0646324	0.160777	-0.161633	0.0442743	0.10452	-0.107332	-0.136262	0.0440434	0.133464	-0.151198	-0.0311114	0.0692048	-0.0182746	-0.0892842	0.034381	0.013215	-0.0986861	0.150798	0.0407371	0.205275	-0.020189	-0.0576904	-0.0073465	-0.0757222	-0.0280137	-0.00545066	-0.10156	0.0325339	0.0453247	0.0668505	0.00355013	-0.00945983	0.138408	-0.0147574	0.0585774	-0.0335979	-0.0721756	-0.043788	0.0446167
TCA cycle	0.059684	0.133958	0.154761	0.119603	0.0209705	0.0359126	0.0239519	0.0536736	-0.037609	-0.0200648	-0.00628445	0.0335846	-0.0219014	-0.000398652	-0.00953688	0.0471555	0.0872258	0.0215563	-0.026482	0.0471781	-0.0198778	0.000160629	-0.0305719	-0.00513577	-0.0636437	0.0329022	-0.0246417	-0.0685481	-0.0173615	-0.00967493	-0.0220031	0.0157693	0.0226471	0.0275401	-0.0202151	0.00505663	0.0121085	-0.00980193	0.0324406	-0.0342079	0.00179454	0.0259664	0.0529225	-0.033033	-0.0565746	-0.0199438	-0.0487428	0.0131322	-0.0707205
TCA-associated	-0.00638331	0.103568	0.0824011	-0.0329569	0.00402094	0.00419096	0.0687817	-0.11393	-0.051938	0.109847	0.0457496	0.104389	-0.0672437	-0.0715712	-0.274903	0.0563924	-0.0465728	-0.00591701	0.0278307	0.0574922	0.303418	-0.20811	0.0555037	0.033514	0.114383	0.15185	-0.0805568	-0.0397094	-0.0293025	0.0257803	0.143326	0.016482	0.00067663	-0.0613009	-0.0493075	0.117225	-0.101945	0.0796371	-0.0733882	-0.123758	0.0507864	-0.0113265	0.0190159	-0.00581261	-0.00326979	-0.0759555	0.0556041	-0.0190004	-0.0211738
Tetrahydrobiopterin synthesis	-0.129179	-0.0811802	0.0671375	-0.0926276	0.00565791	0.0218376	0.0799322	-0.0304869	0.0152749	0.00549656	0.0608087	0.0773134	-0.0858489	0.0627999	-0.0419441	0.0280728	0.0397778	0.0780593	0.00558647	-0.00448627	-0.00188183	0.0662835	-0.0597074	-0.0828736	-0.0736087	-0.0383176	0.0396498	0.0129295	0.0190626	0.0628978	0.047728	-0.0159035	-0.028127	0.0460365	-0.0395511	0.0510962	0.0605342	-0.15544	-0.014817	0.0115869	0.0186246	0.167121	-0.00417984	-0.143723	0.0199354	-0.087357	-0.114417	0.0730142	0.0233422
TIM22 carrier pathway	0.118878	-0.0408527	-0.0562841	-0.0217301	0.0817839	0.0391268	-0.0184005	0.01316	-0.0245724	-0.0670337	-0.121013	-0.0343097	0.0360169	-0.0172647	-0.00747392	-0.0213909	-0.147764	-0.129062	-0.0526083	-0.138717	0.0610484	0.0040966	0.152102	0.10863	-0.132233	0.0497883	-0.0151198	-0.0117399	-0.171421	0.0224397	-0.0164339	-0.0869156	0.151712	0.0995415	0.196218	0.106303	0.076729	-0.050302	-0.181208	-0.0759627	-0.106891	0.0289265	0.151645	-0.228316	0.138596	0.203161	0.0115728	0.0806949	-0.314719
TIM23 presequence pathway	0.0677525	-0.0348329	0.129519	-0.051667	0.172071	-0.018581	0.00713718	-0.0868709	0.0164618	0.0371219	-0.0849465	0.0322145	-0.0635813	-0.000147427	-0.0498024	0.0582973	-0.159499	-0.105245	-0.140904	0.00794825	0.100455	-0.0126813	-0.0521085	0.0172768	-0.159601	-0.0837341	-0.132621	-0.0250306	0.044794	0.0337702	0.0942994	0.129998	0.113624	-0.0169561	-0.0432876	-0.128654	0.0568239	0.100484	-0.106118	0.152263	0.02722	-0.0143691	-0.00796136	0.0360953	0.0463142	-0.0270812	0.0820755	0.049969	-0.0568859
TOM	0.0327262	-0.138291	0.103393	-0.00610398	-0.00735102	-0.0943484	0.113866	0.0492453	0.0669964	-0.103439	-0.0602405	-0.0327564	-0.0571866	-0.0706988	0.0114504	-0.0575666	-0.0244717	-0.0480221	0.0446558	0.0293986	-0.154644	-0.00274672	-0.123548	-0.0767285	0.0729587	0.0255402	0.073773	-0.00513918	-0.215653	-0.0716378	-0.0258016	0.0534851	-0.210832	-0.0393211	-0.00728782	0.0938853	0.0749943	0.00407373	-0.129835	0.126848	-0.113423	0.109776	0.0944678	-0.017462	0.100601	0.0478654	0.0285623	-0.126546	0.088083
Trafficking	0.0496132	-0.083868	-0.0785301	0.0204347	-0.09153	-0.0215544	-0.137274	0.118388	0.0932089	-0.128266	0.0293659	-0.0222692	0.114724	0.000469576	0.0575772	0.0909367	-0.234451	-0.00652025	0.0872984	0.00119713	0.0233112	-0.0299312	-0.0406448	0.205669	0.0752719	-0.0363428	-0.0890813	-0.170825	-0.00715828	-0.175666	0.0473356	-0.0202669	-0.109086	0.136549	-0.0454856	0.212656	0.0412025	-0.0763626	0.103711	-0.00843431	0.0283432	0.141354	-0.015623	0.0130416	0.0438271	-0.0417539	0.0306166	0.135785	-0.0465234
Transcription	0.135709	-0.0318438	0.0156547	-0.0444775	-0.0732846	0.019984	-0.0344139	-0.170338	-0.127379	0.0411849	-0.0655155	0.0470653	-0.0216095	0.0454659	0.0209718	-0.0373031	-0.0101606	-0.0377382	-0.0283878	-0.0380563	0.0649281	0.0643387	-0.0288178	0.00323231	-0.0556225	-0.00772556	0.0478338	0.0699051	-0.0558049	0.0437211	0.0366194	-0.0922503	-0.0709093	-0.0405304	-0.00767803	-0.00914565	-0.063631	0.0677959	0.0474074	0.0168684	0.0677499	0.0152693	0.0155963	0.0679621	-0.144744	0.0844264	-0.0581955	-0.0501012	0.0640689
Translation	0.123649	-0.0822612	0.137618	-0.0268956	0.0171575	-0.0689537	-0.0110602	-0.0605359	0.0403354	-0.0477338	0.0706763	-0.0256211	0.0103017	-0.034386	0.0125738	-0.098092	-0.00562916	-0.0232645	0.0206356	-0.0955376	0.0515539	-0.038298	0.0284731	-0.0255661	0.026186	0.0665287	-0.00876007	0.0122018	0.00437292	0.0412023	-0.0184817	-0.00912652	-0.0124192	-0.00486802	0.0337258	-0.0200037	0.0315715	0.0358782	0.0682602	-0.0199624	0.0302855	-0.0348835	0.0224175	-0.0501783	0.0448381	-0.00420096	0.057236	-0.0142169	0.0853596
Translation factors	0.0936633	-0.0411246	0.0616383	-0.0375671	0.0182856	0.133363	0.125347	0.0258857	0.116568	-0.0970132	0.122224	0.0513499	0.0364839	-0.0235937	0.110903	-0.0354508	-0.0314534	0.00761355	-0.125986	-0.0928475	0.0527214	0.0385464	0.139786	-0.117203	0.11288	0.119435	-0.00824365	0.0244714	-0.0274225	-0.183609	0.00264581	0.00624662	-0.0506841	-0.0187172	-0.0512565	-0.155218	-0.121099	0.066229	0.0736457	0.0359198	0.158388	0.0706464	0.205323	0.0534286	0.00912329	-0.0583116	-0.138649	-0.0673152	0.00137458
Type II fatty acid synthesis	-0.00221374	-0.00647736	-0.0735224	0.130354	-0.0988188	0.19295	0.00983575	-0.142407	0.0637147	0.026537	0.000772675	0.102924	0.0121854	0.0532274	-0.191546	-0.0683112	-0.0740809	0.0837566	0.0205874	-0.0399889	0.0613879	-0.122548	-0.0600448	0.0293003	0.0597556	0.0947915	0.0881352	-0.0291641	-0.0793584	-0.0216869	0.0326347	-0.054885	-0.00801608	0.0223324	0.150735	0.0619127	-0.0612711	-0.0646862	0.0652854	-0.0592102	-0.0254897	-0.0846466	-0.0885837	0.0259027	0.0959434	0.101772	-0.030415	-0.00530552	0.0536678
Urea cycle	0.00115116	0.121254	-0.0282576	-0.123641	-0.128736	-0.019525	0.0853984	-0.0985265	-0.00347362	0.154427	0.0197081	-0.00266441	0.036124	-0.0276499	0.0609426	0.0894399	-0.126767	-0.0704834	0.19602	-0.0485317	-0.148784	-0.0108518	0.0125374	0.0308559	0.0363651	0.00297705	0.0853441	-0.0188127	0.00440385	-0.0832803	0.12677	0.0693104	0.0146239	0.113003	0.073167	-0.0934007	0.129406	-0.0637284	0.0477775	0.101289	0.0867206	0.00629598	0.00544053	0.0048501	-0.0038852	0.0389899	0.105044	-0.0738808	-0.0178132
Vitamin A metabolism	0.0331949	0.0700489	-0.0864744	0.0156878	-0.0188072	-0.0539604	0.0177782	0.0363784	-0.13038	0.125713	0.150311	0.145668	-0.0701433	0.101356	0.147152	0.0297579	-0.0678117	-0.0773373	0.090312	-0.0612469	0.0467316	-0.148496	0.116336	-0.0337908	-0.117314	0.284268	0.0944509	-0.0414862	0.274339	-0.275419	0.0316909	-0.0546473	-0.209916	0.0677651	-0.0802237	-0.0430708	0.00503198	-0.11367	-0.13425	0.299492	-0.195459	-0.138893	0.0599631	0.0384865	-0.0203423	-0.00586473	0.0244935	-0.100649	0.000436405
Vitamin B1 metabolism	0.0393009	-0.0796216	0.017388	-0.0238255	-0.0455657	-0.0755384	-0.0998777	-0.0685334	-0.00201592	0.124021	0.0833102	0.0352641	0.200456	0.00269602	0.0158777	-0.0315422	0.202688	0.0226042	0.204382	-0.105988	0.0347068	-0.0542878	0.258132	-0.228138	-0.00431955	-0.273165	-0.0592833	0.0012493	-0.135883	0.0465468	0.0679535	0.0145219	-0.0544371	0.0715936	-0.260662	0.0757839	-0.20351	-0.0595803	-0.0616457	0.0398745	-0.0799216	0.0778546	0.0552606	-0.0300378	-0.216395	0.19836	0.0825894	0.160487	0.013393
Vitamin B12 metabolism	0.114183	0.0472525	-0.00282789	0.00871486	-0.129461	-0.0292258	-0.00386454	-0.020644	0.156931	0.0740067	-0.182797	-0.0231189	0.000850674	-0.0457918	-0.0276623	-0.0528465	-0.0194968	0.0371389	0.0707236	0.0231291	-0.016188	-0.0391485	-0.0446107	0.0138299	-0.0109501	-0.0185523	0.0446315	0.125176	0.12374	-0.11563	0.00576002	-0.134388	-0.0549606	-0.206044	0.128634	-0.0453835	0.098167	0.100445	0.0314956	0.0592678	0.230234	-0.00898481	-0.0706208	-0.00815959	-0.0284005	-0.0993708	-0.0137145	0.098084	-0.142987
Vitamin B2 metabolism	0.0689131	-0.04517	-0.0535281	0.0583115	-0.0164923	-0.0668326	0.0250536	0.0174104	0.159145	0.224563	-0.050594	0.071738	0.0358253	-0.13262	0.0125083	0.00948738	0.0760926	-0.103325	0.0763488	-0.009639	0.145783	0.168115	-0.147539	-0.145481	-0.157031	-0.076592	0.105281	-0.0896193	-0.155383	-0.0784873	-0.104922	0.0814812	0.221796	0.139238	0.0324688	-0.00755744	-0.1046	-0.0587237	-0.203378	0.0754058	-0.134133	0.114941	-0.0663447	0.168801	0.0437316	-0.188027	-0.0390352	-0.0930558	0.183128
Vitamin B6 metabolism	0.017165	0.0573202	-0.000593211	-0.144181	0.00297272	0.04178	0.104185	0.117956	0.05207	-0.0298492	-0.0939806	0.189017	0.112733	0.00630541	0.0404357	-0.237469	0.0539484	0.196173	0.0118568	-0.00250787	-0.0146391	0.059569	0.0494991	-0.0643153	0.0265321	0.0847012	0.251344	-0.199011	-0.106045	0.0457108	0.007172	0.060349	0.147515	-0.0610146	0.200858	-0.0261725	0.0459901	0.0573014	0.00728989	0.0902054	-0.00769447	-0.00271274	0.274672	0.0120816	0.0941138	0.0246955	0.00622662	0.0780427	0.0941873
Vitamin C metabolism	0.0266954	-0.0398828	0.111517	0.012075	0.0106026	-0.160758	0.0615099	-0.0846792	0.0546754	-0.116309	0.0414542	0.124347	0.173226	0.0714833	-0.0295904	0.0469782	0.0967892	0.0333367	0.0786193	-0.0454212	-0.155808	-0.0923691	-0.0290753	0.026033	-0.0647168	0.00547978	0.270882	0.0586286	0.205161	-0.129665	0.0570597	-0.156158	0.116169	0.0211389	-0.12239	0.0759053	-0.0295644	0.209733	-0.0811412	-0.146691	0.0256416	0.164423	-0.040114	-0.142666	-0.203016	-0.0179854	0.0625197	-0.120399	-0.135951
Vitamin D metabolism	0.0229979	0.00371456	-0.0295069	-0.0243594	-0.0262382	-0.0986883	-0.140331	-0.089962	0.0141588	-0.180185	0.0374202	0.0395847	0.261486	0.314475	-0.0239117	0.174732	-0.0465365	0.00434762	0.016143	0.135612	0.135533	0.129219	-0.0406926	-0.0330614	-0.0284572	-0.0423908	0.0760377	-0.00357929	-0.0183883	-0.0325834	-0.119552	-0.00284526	-0.0769565	-0.016107	0.0289453	-0.0476573	0.0607421	0.0360135	0.0626849	-0.0288921	0.00483736	0.0638985	0.0336933	0.0200841	0.0409633	0.0126406	0.00333709	0.0256384	0.0423458
Vitamin metabolism	-0.0181288	0.0366029	0.000138712	-0.192697	-0.0807045	-0.0163902	0.0706763	-0.0173507	0.0374461	0.0924351	0.209022	-0.0741092	0.0847578	0.156263	-0.108445	-0.021615	0.151022	-0.074548	0.0243386	-0.0744479	0.0282774	-0.181506	-0.156633	-0.106432	-0.0927828	0.120642	0.039398	0.0510008	0.126965	-0.0209323	-0.0719316	0.0217129	0.0331449	-0.0885461	0.0723353	0.0178375	0.038206	-0.13827	0.00794491	0.0453363	-0.14345	0.0540659	0.0633567	-0.03031	-0.00319688	-0.0563648	-0.0626547	0.0413298	0.127203
Xenobiotic metabolism	0.00530382	0.129138	-0.00984424	-0.135352	-0.0125133	-0.168853	0.0111984	0.124197	-0.0310824	-0.0250305	-0.0803843	0.0403542	0.0660645	-0.0951491	-0.065945	0.0662332	0.0170863	-0.057682	-0.00312033	0.0761598	-0.0277171	0.031547	0.0151047	0.000684237	0.0327657	0.106268	-0.0531953	0.0449897	0.0950563	-0.0115493	0.0152474	0.0491257	-0.0526614	0.0876201	-0.0622339	-0.119421	-0.0740877	-0.181049	0.0254841	-0.0365481	-0.0226461	-0.0288051	-0.00106431	-0.050915	-0.0698287	0.027528	0.0194254	-0.148176	0.0021698
[truncated: 100 more columns]

## Sheet: Suppl_FigS8D
Pathway	PC1	PC2	PC3	PC4	PC5	PC6	PC7	PC8	PC9	PC10	PC11	PC12	PC13	PC14	PC15	PC16	PC17	PC18	PC19	PC20	PC21	PC22	PC23	PC24	PC25	PC26	PC27	PC28	PC29	PC30	PC31	PC32	PC33	PC34	PC35	PC36	PC37	PC38	PC39	PC40	PC41	PC42	PC43	PC44	PC45	PC46	PC47	PC48	PC49
ABC transporters	-0.116294	-0.00134681	-0.0610044	0.047854	0.00219275	-0.0182933	0.0250048	-0.0736957	-0.156851	0.083094	0.0192343	-0.103515	0.104527	0.163716	0.0233382	0.0916874	-0.0955737	-0.0787602	-0.0530391	0.0524342	0.101864	0.0519513	-0.0615899	-0.0483043	0.218043	-0.106021	0.0806844	0.138179	0.01522	0.209638	0.073841	-0.0455891	0.0380469	0.0103858	-0.0252957	0.12458	-0.0207885	0.142584	0.127599	0.11907	-0.220718	-0.0528152	-0.111895	0.0335773	-0.032124	-0.0958981	-0.0456038	-0.0708153	-0.0490844
Amidoxime reducing complex	-0.0550608	0.0311057	-0.113956	0.0070468	-0.12866	0.089463	-0.0142473	0.141762	0.111715	0.190579	0.000714995	0.0711056	0.0244018	0.217294	-0.0241729	0.110467	-0.0121009	-0.0608205	-0.0330156	0.150137	0.0530805	-0.00113108	-0.108928	0.0605149	4.52607e-05	-0.0840417	-0.00690955	-0.189043	-0.0582507	0.0407482	-0.130889	0.212828	0.00935533	0.0690143	0.0402187	0.0424387	-0.00104506	0.0624753	-0.0224905	0.0920991	-0.0332866	0.0699432	-0.011263	-0.1215	-0.0351286	-0.100943	0.178997	-0.222565	-0.194994
Amino acid metabolism	0.0129557	0.138408	0.027772	0.182679	0.0130589	0.0189253	-0.00599453	-0.0521573	0.0824644	0.00684632	0.0108896	-0.0131005	0.0878229	0.071376	-0.083728	0.0369968	0.0514861	-0.0768742	-0.0190953	-0.0585709	-0.0414759	0.0493991	0.0634731	-0.0274549	-0.0128403	-0.00422756	0.0273207	0.0634133	0.0271692	-0.0300902	0.0229139	0.00929023	0.0889231	0.0218165	0.0205351	-0.0952384	-0.00134331	0.0830038	-0.0527992	-0.00190075	-0.00752359	-0.0363433	-0.0332264	-0.0273293	0.0598443	0.0746814	0.000985467	-0.0383033	0.0760695
Apoptosis	0.00643015	-0.101861	0.0112796	0.0834685	0.0951024	-0.147679	-0.0803153	0.0108192	-0.1814	0.156871	-0.041738	-0.0780918	0.0745994	0.183394	0.016645	-0.144045	-0.093273	0.127751	0.0837068	-0.0768398	0.0906921	0.0573696	-0.00275395	0.0968282	-0.0750119	-0.0655303	0.0142477	-0.0830773	0.00698353	0.00417542	0.0600136	-0.0299027	0.0376946	-0.0632287	-0.125973	-0.0657925	0.0299474	0.00120477	-0.00661922	-0.187345	0.0431774	0.0196488	-0.0185605	0.129698	-0.0404339	0.0403071	-0.0271617	0.0273182	-0.0973124
Autophagy	0.0114324	-0.14903	0.0638978	0.0419084	0.0212475	0.0365994	-0.0912837	-0.11529	-0.0185509	0.0907684	0.0705047	-0.0118815	0.106783	-0.0717231	0.0673123	0.0852327	0.0719436	0.100835	-0.178199	0.0193703	-0.130973	0.0358138	-0.037913	-0.0647024	5.3953e-05	-0.0140332	-0.101901	-0.0186446	0.0690877	-0.195142	-0.0305845	-0.0357627	0.0963707	0.0892099	0.027288	0.06933	0.0314095	0.0747642	-0.0367614	-0.0514173	0.130173	0.034973	0.0705939	-0.00666151	-0.0556599	-0.0562012	0.029307	0.00189987	-0.175019
Biotin utilizing proteins	0.0194543	0.0300377	-0.0493977	0.0578618	-0.0148323	0.262093	-0.0548669	-0.0621494	-0.220141	0.0380119	-3.43134e-05	0.13738	-0.19995	0.043888	0.150279	-0.0134302	0.0352882	-0.00304638	0.00978022	0.177335	-0.0077835	0.179779	0.0668691	-0.0487329	0.0739339	0.0415783	-0.0266262	0.152867	-0.0501883	0.0155186	-0.0436084	0.0646441	-0.0719885	-0.047791	-0.00527722	-0.0632546	-0.0884626	0.00314536	-0.00791342	0.0716773	0.0493602	0.122556	-0.0282958	-0.0172671	-0.147573	-0.156065	0.074214	0.140051	0.166688
Branched-chain amino acid dehydrogenase complex	-0.0963455	0.0836236	0.0884287	-0.0515781	-0.0416013	0.0262333	-0.0834322	-0.0445153	0.0470811	0.00442755	-0.157179	0.00920826	0.0607858	0.103947	-0.0554174	-0.0361504	-0.0891125	-0.0383029	-0.018109	-0.0952076	0.0781997	0.0111691	-0.201754	-0.0636935	-0.0392687	0.197149	-0.181894	-0.0210629	-0.0512838	-0.0902239	-0.0944197	0.00883803	-0.0766808	0.0505891	-0.110562	-0.0562622	-0.0884321	0.124065	-0.126576	-0.0576538	-0.0334105	0.0481424	-0.0826312	-0.146575	-0.109288	0.0620208	-0.0731919	-0.00517251	0.101054
Branched-chain amino acid metabolism	-0.022035	0.165	0.0398181	0.108314	-0.043936	0.0441156	-0.0615889	-0.0498502	0.0320262	-0.0022808	-0.0584926	0.00377832	0.0399176	0.0445492	-0.0332153	0.0132917	-0.0541466	0.023658	-0.0225165	-0.048705	-0.0684093	0.086879	0.0106984	-0.0171597	-0.0154006	0.0230594	-0.00419921	-0.000217896	0.0397164	-0.0651725	-0.0038351	-0.00495663	-0.0348509	0.0054763	0.0272582	-0.0610893	0.0160065	-0.0295061	0.0324997	0.00938635	-0.00370588	0.0844593	0.0273774	-0.0443806	0.0430739	0.0949034	0.00346714	-0.0184837	0.0186841
Calcium cycle	-0.116029	0.0529417	0.0795	-0.118691	0.0376938	0.0226943	-0.111369	0.0320243	0.0266756	0.00193868	-0.0230597	-0.0228658	-0.00131839	0.0130915	0.0362526	0.0312446	0.102138	-0.0856192	-0.00616154	0.00331766	-0.000738767	-0.0345423	0.0177189	-0.0549967	0.0703357	0.150282	-0.0875664	0.0280072	0.042262	0.123151	0.0358388	0.0491188	0.0574402	0.0952793	0.00590279	-0.0729719	0.119745	0.0545799	0.0258159	-0.0638513	0.0418788	0.0623268	-0.104032	0.00936404	0.111915	0.0369344	0.058428	0.0131195	0.0595987
Calcium homeostasis	-0.0995571	0.0241223	0.056705	-0.0948872	0.159875	-0.144807	-0.089903	-0.03005	0.00993001	0.0082089	0.0931737	0.0573752	0.0453767	0.0204377	0.0103026	-0.0606091	0.0567799	-0.106985	0.0487086	0.0947967	0.0375375	0.00545641	0.0454049	-0.0258168	0.0164453	0.128903	0.0661435	0.0716337	0.0340027	0.0786118	-0.00531605	0.0844617	-0.0184421	0.102214	0.0122958	0.00596736	0.0387246	-0.0590922	0.0205403	0.0179261	0.100156	0.0987462	0.111935	0.0313829	-0.0898949	0.0856376	-0.0343599	0.110133	-0.0317839
Calcium uniporter	-0.0934998	-0.0388419	0.0355309	0.0279591	0.138704	0.0370537	-0.00408811	0.0362728	-0.0743738	0.0221026	-0.145709	-0.149351	0.211037	-0.00584393	-0.125822	0.0608502	0.169999	-0.0800224	0.0466276	-0.0792209	0.0166877	0.154259	0.237727	-0.00625102	0.114289	0.0165493	0.04106	-0.0235286	0.0130442	-0.0626623	0.159245	0.096991	-0.0328466	0.220745	-0.143686	0.11894	-0.0046422	-0.0348627	0.0107949	0.0488748	-0.0642142	0.0338653	0.0287459	-0.107163	0.0483747	-0.181166	-0.00239901	-0.13487	-0.0753009
cAMP-PKA signaling	0.00135849	-0.0421181	0.0144174	-0.0655587	-0.215419	-0.014591	0.0511439	-0.0493075	-0.0477538	0.0649609	0.00793745	-0.0970245	0.00259579	0.151836	0.17596	0.00187538	0.227763	0.35905	-0.0809984	-0.120451	-0.0397063	-0.0214487	0.0948465	-0.0243067	-0.000409316	0.138279	0.169386	0.065727	-0.0895123	0.0027275	-0.218679	0.0775762	-0.294895	0.0981442	0.122293	-0.102646	-0.296227	-0.183956	-0.146313	0.123508	0.0413311	-0.0732152	0.0367447	-0.0263068	0.0519395	0.0445516	-0.0364269	-0.132172	0.0367447
Carbohydrate metabolism	-0.0308133	0.146312	0.145202	0.0243983	-0.0140632	0.0251283	-0.0133893	-0.0261897	-0.0135922	0.0524496	8.27975e-05	0.0162591	0.0113372	-0.0136371	0.0751448	0.0554571	0.0186373	0.0544349	0.0235193	0.0207023	0.00911911	0.0350646	-0.00295287	0.0351201	-0.0055605	-0.0256164	0.0145339	-0.0368171	-0.00331684	0.0221526	0.0474526	0.0496793	0.0722155	-0.0209255	-0.0572344	-0.0300918	-0.0604518	-0.0731578	0.00236122	0.0159815	0.0121956	0.0380648	-0.0486074	0.0240635	-0.0549516	-0.0625083	0.00905638	-0.0132751	0.047099
Cardiolipin synthesis	-0.0924803	-0.00370156	-0.0689054	0.0461967	-0.116174	-0.0741296	-0.0844451	-0.103054	-0.10132	0.139515	0.00592153	0.141237	-0.119866	0.107059	0.0618591	-0.080459	0.10619	0.025057	-0.0103717	0.148686	0.0687541	-0.0954769	0.0868933	0.0476848	-0.0877232	0.0601525	-0.240489	0.0358878	-0.10502	0.0524759	-0.0446088	0.132773	-0.0942474	-0.139028	0.0403087	-0.0765954	0.17024	0.0598635	-0.0871813	-0.0950215	-0.148023	-0.0131633	-0.0194474	-0.00219891	-0.021358	-0.189123	-0.133225	0.00383488	-0.0385722
Carnitine shuttle	-0.0494687	0.0927084	0.0800318	0.0106015	-0.0451805	-0.102824	0.237715	0.0714485	-0.0122436	-0.0168659	0.0976708	-0.0745443	0.0103962	0.0796607	-0.0695029	-0.075213	0.12972	0.0295321	-0.0874834	0.0664729	0.0768919	-0.229071	0.041619	0.130885	0.104212	-0.0100028	-0.0403311	-0.00984115	-0.0261116	-0.135158	-0.0827527	-0.125849	0.0252165	-0.00902482	-0.0109292	0.0124121	0.144763	0.072017	-0.0817785	-0.0235785	-0.0224713	0.135775	0.0197067	0.0180362	-0.145249	-0.0201331	-0.00157877	0.0562147	0.0561301
Carnitine synthesis and transport	-0.0580343	0.0951649	0.0852491	0.00517159	-0.0315532	-0.0855629	0.229992	0.0637913	-0.0226828	-0.0108448	0.0923113	-0.0714288	0.0325423	0.0927127	-0.0655233	-0.0656256	0.125327	0.0383802	-0.0907892	0.0521487	0.0828901	-0.214472	0.0139189	0.12201	0.081402	0.00647493	-0.0253057	-0.0162783	-0.0115624	-0.123995	-0.0814182	-0.134802	0.0102577	-0.0121286	-0.0121689	0.0107216	0.142059	0.0643884	-0.0903645	-0.0281352	-0.0569855	0.141289	0.00351554	0.0314799	-0.13761	0.015465	0.0284023	0.0764914	0.0414142
Catechol metabolism	0.0167185	0.0373121	-0.085456	0.0448363	-0.02009	-0.000252657	0.0685623	0.0747474	0.1975	0.203807	0.268311	0.0673873	0.00679635	0.197919	0.0533726	0.0787083	-0.0596316	-0.0575697	0.0244511	0.114152	0.124983	-0.0767018	-0.134992	-0.145973	-0.119369	-0.00621668	0.121937	-0.0349472	0.216682	0.00373653	0.302836	-0.055297	-0.032844	0.245866	-0.139372	-0.216714	0.0717644	0.0811314	-0.0291347	0.0900993	0.0632105	-0.174797	0.0617283	-0.00161158	-0.0154491	-0.0559559	-0.180203	0.000427885	0.155651
Chaperones	-0.0318844	-0.0585911	-0.0396424	0.126926	0.00545327	-0.0266204	-0.216997	0.21596	0.162711	-0.0455514	0.0104887	0.0934614	0.00896626	-0.0269248	0.00546756	0.0545874	0.0720631	0.127793	-0.0899004	-0.00511466	0.0641752	0.0223618	0.0728894	0.0671104	-0.0356217	0.02772	-0.150124	-0.161362	-0.0203451	0.109368	-0.0983034	-0.0545417	-0.0113271	0.106936	0.0860688	0.192383	0.0409154	0.0274963	0.14785	0.00609834	0.0191698	-0.0766893	-0.088773	0.0525858	-0.0221575	0.209563	-0.0979434	-0.0544811	0.195125
Cholesterol-associated	-0.0603521	0.0166542	-0.0458595	0.0806471	0.080039	-0.0610997	-0.040175	0.0216521	-0.172704	-0.0492123	-0.0515869	-0.169598	-0.0696107	0.0169974	0.273395	0.000955045	-0.155765	-0.199286	0.0611893	0.314508	-0.0323901	-0.0870713	0.107094	-0.137019	-0.0909853	0.1219	0.0932086	-0.233746	0.00991741	-0.190564	0.191954	-0.0162337	0.0172468	0.0592758	0.298148	0.00265879	-0.149253	-0.08497	-0.0264088	-0.150603	-0.0781301	0.0167895	-0.0744562	-0.0583916	-0.0907424	0.0649126	0.12537	-0.0588118	0.0867468
Cholesterol, bile acid, steroid synthesis	-0.0178899	0.0221234	-0.052962	0.0110154	-0.11021	-0.0104529	-0.240917	0.270787	-0.0411162	-0.172775	0.0944079	-0.0654559	0.0931673	0.0604331	0.118025	-0.0587011	-0.112149	-0.0474105	-0.0364275	0.000967615	0.0765048	0.00997238	0.0610655	-0.00819927	0.0421953	0.0553607	0.00577596	0.0683963	0.0233339	-0.123893	-0.0648462	0.089028	0.0538409	0.00631037	-0.0534565	-0.0101412	-0.000290607	0.134902	0.0272788	0.0174538	-0.0447694	0.0663689	-0.0408864	-0.0812118	-0.0297232	-0.0756952	-0.0321466	0.0609613	-0.0469865
Choline and betaine metabolism	-0.00185939	0.154362	0.0608965	0.137702	-0.0113281	-0.0256844	-0.0114302	-0.0041474	0.0368367	0.0373239	0.0276487	0.000642639	0.00784512	0.0468718	0.0197321	-0.0680564	-9.30413e-05	-0.0172714	-0.00657706	-0.0275869	0.0444083	0.0994028	0.00279134	-0.00590193	-0.0450872	0.0287749	-0.0619741	0.018919	0.169178	-0.126012	-0.08589	-0.130403	-0.0983591	-0.0181699	0.0328574	0.177626	-0.0498177	0.0720658	-0.0257312	0.10616	0.0922205	-0.151438	0.103047	0.022127	-0.104351	-0.0257307	-0.00783751	0.0653912	0.0111151
CI assembly factors	0.0252397	-0.129231	0.113185	0.0664866	-0.115591	-0.0460801	0.0918113	-0.00470077	-0.0370078	-0.101689	-0.0219307	0.0691666	-0.0148959	0.0270702	-0.0167259	0.0838261	0.0157706	0.0479267	0.0136988	0.0702683	-0.0816949	0.00390079	0.0237421	-0.117131	0.0118668	0.0135837	-0.0965111	-0.0244771	0.0885054	-0.0134967	-0.111845	0.0418205	0.0739092	0.159692	-0.112744	0.0678911	0.0418802	-0.0551111	0.0537083	0.0446625	-0.134032	0.130067	0.0745792	-0.039823	0.0965983	-0.00844568	0.0229527	0.0371515	0.0943319
CI subunits	0.147292	-0.0387214	0.0514443	0.0375562	-0.00210203	-0.0770986	-0.0277079	0.0160399	0.0133074	0.00136065	-0.0226166	0.0240553	-0.0507043	0.0405699	-0.00759902	0.0268031	0.0118551	0.00157981	0.00446706	0.0151562	0.0327857	0.000692415	-0.0641617	0.0468429	0.0110305	0.0113555	0.0655496	0.00576302	-0.056525	0.0352756	0.0318676	-0.0121671	-0.0145128	-0.00886789	0.0287901	0.0168107	-0.0693625	0.0561977	0.0430414	0.0157446	0.0275353	-0.00568986	-0.0994671	-0.0504701	0.0252852	-0.044179	0.0167997	0.0790941	-0.036377
CII assembly factors	-0.107014	-0.0882665	-0.0174825	0.0833586	0.0985212	0.0466032	0.010417	-0.0423377	-0.00310192	-0.0578399	0.0163455	-0.0857575	-0.0906338	0.128532	-0.00460195	-0.00997276	0.038491	-0.0342797	-0.0584039	0.0457247	-0.0981383	0.0411789	0.0353296	0.0443976	0.0622757	-0.195115	0.0771837	0.0224026	0.0194024	-0.0760064	0.0100254	-0.0285228	-0.173946	-0.0941341	-0.144205	0.118486	-0.0903224	0.170817	0.0164678	-0.0851722	-0.15473	-0.0446325	0.142323	0.0432848	0.157497	0.115762	0.0793912	0.130675	0.178269
CII subunits	-0.072116	0.124989	0.1215	-0.0112256	0.0637346	0.013233	0.0194593	0.0724526	0.00810514	0.0223318	-0.0919042	0.0161928	0.0112715	0.0127698	0.0176911	0.095735	0.0521872	0.0336776	-0.0341305	-0.0363066	-0.0502583	0.0410057	0.0933545	-0.133084	-0.0630472	0.0129463	0.0539248	-0.0871882	-0.0262577	0.0775202	-0.0433914	0.0405004	0.0130314	-0.0278231	0.0445783	-0.0954173	0.0743535	0.0977827	-0.0602339	-0.0298726	-0.0197437	8.44692e-05	0.0518202	-0.0281815	0.0101947	0.089981	-0.0187544	0.0103493	-0.047432
CIII assembly factors	0.00721832	-0.0971146	0.133295	-0.00934954	-0.0680786	0.0452978	0.0784282	-0.0891295	-0.000114641	-0.0804363	0.175952	-0.166986	0.0478823	0.104354	-0.0435638	-0.11564	0.00810122	-0.0147873	-0.0203422	0.115173	0.178392	0.128556	-0.0762883	-0.0192996	-0.141996	0.00305056	0.0764173	0.0441759	-0.0684899	0.053922	-0.082645	-0.0945689	-0.142832	0.0203189	0.0854266	-0.0756045	0.145187	-0.00929559	0.189308	-0.229736	-0.121377	0.155346	-0.0777872	-0.122343	0.0645955	0.0332451	0.129463	-0.231252	-0.000818503
CIII subunits	0.145798	0.00260787	0.0713449	0.008904	-0.013455	-0.0528804	-0.0565037	-0.031388	-0.0264058	-0.0454122	-0.0708021	-0.020554	-0.0581182	0.0465751	-0.0401121	0.0782935	0.037641	-0.03212	-0.0171157	-0.00130333	0.0545975	0.0319959	0.000101695	0.02045	0.0102801	-0.0158337	0.0227952	-0.0507566	-0.033012	-0.0450749	0.0330979	-0.0525669	-0.043374	-0.00545101	-0.0246899	0.00551534	0.0325259	0.0197353	-0.0451215	0.0280488	-0.00900948	0.0899077	0.0173631	0.0164859	-0.0305098	-0.102069	-0.0887609	0.00397024	0.0442969
CIV assembly factors	0.0152515	-0.0761963	0.0922939	0.0737241	0.185745	0.145276	0.0793006	0.0716107	-0.088704	-0.0756679	0.120268	-0.041556	-0.121798	0.0509959	-0.0596623	-0.153444	-0.0573066	0.0607576	-0.0278684	-0.00574565	-0.0269377	0.0017825	-0.0641033	0.00940903	0.0506849	-0.0827331	-0.0265403	-0.0288132	-0.105896	0.0205575	0.0495387	0.0668069	0.0395444	0.0363307	-0.0301454	-0.115102	-0.0669034	0.0520647	-0.0269356	-0.034564	0.0386513	-0.120517	0.0686684	-0.129278	-0.176259	0.0156278	-0.140489	-0.131971	-0.0309328
CIV subunits	0.144924	-0.0379326	0.061825	0.0288458	0.0297221	-0.0728971	-0.0213408	0.0207053	-0.00955468	-0.0229199	-0.0655825	0.0115205	-0.0303771	0.000574823	0.0177523	0.0526989	-0.00607412	-0.0164594	0.00384918	-0.00351576	0.00540588	-0.0422301	-0.0434346	0.088874	0.0441204	0.0250444	0.010594	0.0598321	0.0201636	-0.0251604	0.0282886	0.0624593	-0.00727212	0.0567593	0.106212	-0.064625	-0.0139716	0.0622761	0.043963	0.087264	-0.0597467	-0.00428849	0.023453	0.026017	0.0117702	0.0639276	0.1011	-0.0266986	0.0256967
Coenzyme A metabolism	-0.0999144	0.0104178	-0.0281031	0.0643546	-0.0667877	-0.112526	-0.0504253	-0.141184	0.112614	-0.0265233	0.0642682	-0.0259735	-0.117421	-0.0475228	-0.0114274	-0.0114408	-0.17779	-0.0592183	0.192314	-0.210124	-0.069779	0.0424404	-0.0729147	0.140161	-0.294733	0.0489522	0.107305	-0.00203375	0.0319381	-0.154941	-0.108554	0.123102	0.00418313	0.071926	-0.0291115	0.0118891	0.0354425	0.156968	-0.183419	0.131139	-0.0265211	0.0892922	-0.0290483	0.158824	-0.0378479	0.0825666	0.017783	-0.117331	-0.0420258
Coenzyme Q metabolism	-0.0486525	0.0567227	0.156075	-0.10703	-0.0752946	0.0169659	-0.0977587	-0.0334103	-0.0174338	0.0516857	0.0852791	0.0376727	0.0842144	-0.107462	0.159541	-0.0389179	-0.0116941	0.0178901	-0.0248811	-0.0539972	-0.113956	-0.0356762	0.0707675	0.0356559	0.0475067	-0.278778	-0.0122006	-0.024435	0.0154815	0.10158	0.0492559	-0.00834378	-0.219577	0.0773634	-0.0581943	0.0596578	-0.00299258	0.0501344	-0.00830402	-0.0101805	-0.116401	-0.0162021	-0.129419	-0.0891013	-0.0867123	0.00733028	0.160134	0.0626493	0.168652
Complex I	0.147291	-0.0388333	0.0515442	0.0376348	-0.0021521	-0.0770528	-0.027603	0.0159484	0.0132308	0.00126037	-0.0226512	0.0239742	-0.0506458	0.0405954	-0.00746928	0.0266757	0.0118355	0.0016514	0.00414353	0.0149548	0.0326523	0.000895821	-0.0636654	0.04633	0.0109191	0.0115424	0.0646885	0.00568237	-0.0558728	0.0351675	0.0313396	-0.0123732	-0.0141925	-0.00846827	0.0279673	0.0167582	-0.0685444	0.0562813	0.042882	0.0157594	0.0275775	-0.0058241	-0.0984658	-0.0502645	0.0250309	-0.0442468	0.0154741	0.0784178	-0.0373963
Complex II	-0.0865028	0.111381	0.118283	0.000614199	0.0767093	0.0192445	0.0201224	0.0670003	0.00769924	0.014823	-0.0889092	0.0037667	-0.00296283	0.027686	0.0142161	0.0956912	0.0605584	0.0277784	-0.0396034	-0.0285761	-0.0657897	0.0462549	0.103448	-0.126229	-0.0539181	-0.0138227	0.0651717	-0.0880278	-0.0227079	0.0644542	-0.048969	0.0382083	-0.00980913	-0.040252	0.0206883	-0.077532	0.0639589	0.116611	-0.0594996	-0.0414075	-0.041487	-0.00675676	0.0709038	-0.0195503	0.0274433	0.0982144	-0.0103551	0.0370657	-0.0296716
Complex III	0.145806	0.00229955	0.0718325	0.00916062	-0.0137525	-0.0526959	-0.0559377	-0.0315789	-0.0257163	-0.0452615	-0.0693886	-0.0209589	-0.0581628	0.0478615	-0.0400384	0.0765916	0.0370672	-0.0319193	-0.0181379	-0.00159768	0.0559253	0.0327627	-0.000689822	0.0199541	0.00993386	-0.0156271	0.0227957	-0.0498238	-0.0327254	-0.0448093	0.0333346	-0.0542168	-0.0437916	-0.00590811	-0.0245775	0.0048746	0.0330335	0.0207989	-0.0427672	0.02549	-0.00832956	0.0900382	0.0173187	0.0161897	-0.028609	-0.101152	-0.0882463	0.00141062	0.0414124
Complex IV	0.144933	-0.0380707	0.0620163	0.0291324	0.0299621	-0.0726649	-0.0211034	0.0208654	-0.00941796	-0.0227139	-0.0650013	0.0114595	-0.0306365	0.000983963	0.0177624	0.0517844	-0.006425	-0.0160699	0.00319768	-0.00398813	0.00564014	-0.0418108	-0.0432754	0.0880208	0.0438816	0.0249309	0.0101519	0.0593326	0.0203509	-0.0253245	0.0281888	0.0615329	-0.00704789	0.0564747	0.105325	-0.0645899	-0.0138379	0.0624838	0.043931	0.0867483	-0.0589018	-0.0047913	0.0236164	0.0254557	0.0110883	0.0626871	0.0984297	-0.0269343	0.0238947
Complex V	0.141925	0.00275284	0.0594966	0.00705543	-0.0534464	-0.0865648	-0.0618909	-0.024487	-0.0156789	-0.0422253	-0.0507077	-0.0269599	-0.0915313	0.0503953	-0.0593274	0.048423	0.0466165	-0.0373247	-0.0475388	-0.00151825	-0.0138074	0.0440771	-0.0149054	0.0675279	0.00798407	0.0534922	0.0607665	-0.0054737	-0.0818174	0.116192	0.0375785	-0.0189036	-0.0246857	0.0746179	-0.0326131	-0.00415447	0.021499	0.108627	-0.0881358	-0.02542	0.0177516	-0.0369001	-0.0970062	-0.0956774	-0.100398	0.020603	0.0445539	0.106041	-0.0510706
Copper metabolism	-0.101885	0.0476733	0.108836	-0.112081	0.0661729	0.0508121	-0.0825825	0.0520835	0.010477	-0.0175809	0.0261152	-0.00366867	-0.0433814	0.0391349	0.00052816	-0.0299083	0.0399972	-0.101149	-0.0226626	0.044737	-0.133879	-0.111042	-0.0392785	0.0749659	0.0332063	0.198027	-0.125318	0.0348263	-0.0117185	0.179146	0.0474167	0.041064	0.0756457	-0.0213257	-0.0193687	-0.16986	0.0287044	0.031385	0.0425227	-0.109946	0.107092	0.0559816	-0.0629044	0.00134816	0.0899047	0.177394	0.0256436	0.0720934	-0.00845133
Creatine metabolism	0.0196224	0.0825777	0.0457263	0.0355611	0.010243	-0.0464633	-0.105959	-0.254297	0.0345527	-0.159667	0.0355438	0.196273	0.0951389	-0.000955588	-0.0221408	-0.213853	-0.00734658	0.122259	0.0557882	0.0879167	0.222929	-0.134871	0.0357315	-0.0877108	0.099046	-0.0666241	-0.0745834	-0.158077	-0.0265335	0.00843818	0.0122666	0.00186038	0.0198065	-0.0376076	0.111029	0.0587469	0.0251223	0.0215498	-0.0543935	0.0517714	-0.130578	-0.145921	-0.0206433	0.0282593	0.0986789	0.00681117	0.0574959	-0.0923466	0.0179487
Cristae formation	0.0802452	-0.0542395	0.168688	0.0109374	0.098145	-0.0382139	0.00830153	0.0761263	0.0354613	0.0690422	0.0681523	0.00621314	-0.117604	0.0349596	-0.0187162	-0.0647184	-0.0307089	0.0119872	-0.0332231	0.0558531	-0.0402038	0.03395	-0.0102398	-0.0144602	0.0574364	0.0888094	-0.0141207	0.0933343	0.0855822	0.0977566	-0.0884594	0.0665631	0.0738415	-0.0668844	0.0851347	-0.00916852	-0.0426049	-0.0529971	0.052507	0.0346104	-0.0494991	-0.0943512	0.0104662	0.0791971	0.0128334	-0.0903244	-0.0223832	-0.0298514	0.0224261
CV assembly factors	0.0529679	-0.0362486	0.193734	0.00259142	0.0246285	0.082553	-0.0241275	0.0274759	-0.0556753	-0.0413058	-0.0171174	-0.00610135	0.078757	0.0987078	-0.0322863	-0.154542	-0.132699	-0.0161736	-0.122781	0.0469798	-0.160811	0.0132649	-0.0294862	0.0437322	0.0312104	0.125791	-0.105437	0.0237986	0.108557	0.0346121	-0.0780585	-0.0930618	-0.149605	0.0690691	-0.0996403	0.0651772	0.135499	-0.0336913	-0.0572511	0.0849882	-0.00611927	-0.0970151	-0.0137204	-0.0746489	0.0469276	-0.0522471	-0.0459928	-0.0682305	-0.008458
CV subunits	0.141901	0.00277869	0.0593733	0.00696787	-0.053468	-0.0866957	-0.0619708	-0.0243686	-0.0156913	-0.0422552	-0.0509031	-0.02687	-0.0916221	0.0499436	-0.0596451	0.0490391	0.0471032	-0.0375078	-0.0468963	-0.00130791	-0.0138679	0.0438407	-0.0149323	0.0681338	0.0080849	0.0534179	0.0613622	-0.00550587	-0.0823913	0.116266	0.0378109	-0.0180128	-0.0246145	0.0746807	-0.0321311	-0.00410429	0.0209867	0.108238	-0.0885283	-0.025098	0.0170212	-0.0365683	-0.0973131	-0.095696	-0.100678	0.0204869	0.0462318	0.107364	-0.0497118
Cytochrome C	-0.0382326	0.0625556	0.165011	-0.105791	0.0764254	-0.00751865	0.0563036	0.0996978	-0.0435164	0.0422442	-0.0462313	-0.113768	0.0561745	-0.00495069	-0.0784597	-0.0599317	-0.0642794	0.0886349	-0.0260195	0.115145	0.165968	0.0439914	-0.0552997	-0.0467034	-0.0801976	0.028962	-0.0816932	0.153532	-0.162253	-0.0597787	-0.0283129	-0.0498076	-0.0163761	-0.0512807	0.0744886	0.0459935	-0.100799	-0.00733164	0.134458	-0.0474952	0.179986	-0.0681199	-0.0448464	0.157035	-0.0186647	-0.0163469	-0.0204947	-0.0586878	0.0433083
Cytochromes	0.146808	0.00215126	0.0658093	0.00963314	-0.0160374	-0.0509792	-0.0551367	-0.0322988	-0.0263168	-0.0490308	-0.074997	-0.0205066	-0.0562139	0.0453989	-0.0380777	0.0774302	0.0363624	-0.0324896	-0.0183525	-0.00270016	0.0552371	0.0285447	0.0015343	0.0180119	0.0122311	-0.0171026	0.0187806	-0.0501631	-0.0323058	-0.0493706	0.0333151	-0.0532456	-0.0400595	-0.00723444	-0.0232316	0.00689446	0.030003	0.0178579	-0.0409847	0.0322486	-0.00911073	0.0907564	0.011882	0.0156956	-0.0273796	-0.105535	-0.0971201	0.0108554	0.0443392
Detoxification	-0.0208452	0.060152	-0.0539179	0.172216	-0.117248	-0.0276804	-0.0705708	0.0538756	-0.20784	0.183616	0.0150272	0.0364347	0.0174591	-0.117979	-0.0798791	-0.0847718	-0.0433697	-0.0864425	-0.0559144	0.00757133	-0.033324	0.0106009	-0.086103	-0.00853534	0.107386	-0.09684	0.0850479	-0.106631	-0.00353041	0.0577975	-0.0902999	-0.0651452	-0.0973702	0.0836784	0.0245517	-0.143462	-0.0305921	0.0436109	0.0529899	0.0140988	0.0773266	0.0455696	0.0283381	0.0531824	0.140959	0.0876423	-0.0207002	-0.0370271	-0.0412034
EF hand proteins	0.100254	-0.0857583	-0.031851	0.0566197	0.0363524	0.0209279	0.0252295	-0.0534591	0.0932305	0.128471	0.0846203	-0.0906804	0.165285	0.109817	-0.0158091	-0.0409673	0.0221189	0.0316237	0.0218699	0.0246572	0.0608243	-0.0149465	0.122186	-0.103392	-0.0142607	0.0993828	0.129315	-0.144314	0.0547931	0.0598593	0.0630711	0.187036	-0.206493	0.0318443	0.0913504	0.2018	-0.0642762	-0.02715	-0.0167651	-0.00869407	-0.120355	0.218296	0.098243	0.120938	-0.178384	0.282015	-0.203873	0.272516	-0.120178
Eicosanoid metabolism	0.0264595	0.0138738	0.0612347	-0.0225166	0.0991729	0.175957	0.043951	0.0591943	-0.21973	0.0218885	0.14772	0.151896	-0.225636	0.0762275	0.102221	0.111781	0.151351	-0.0872763	-0.0288379	-0.144973	0.246472	-0.0678809	0.0885168	-0.0788376	-0.102867	0.0403959	0.0104164	-0.127616	-0.00960323	0.0623041	-0.0263389	-0.110521	-0.0269756	0.0679928	-0.123512	0.105566	0.179637	0.0290281	-0.125742	0.0511784	0.0119054	-0.100306	0.0513767	0.0515644	0.218582	0.100683	-0.00146916	0.0217968	0.00297348
Electron carriers	0.146734	0.00340708	0.0666044	0.0108487	-0.0159193	-0.0521625	-0.0544823	-0.0313806	-0.0249752	-0.0474169	-0.0737024	-0.0205063	-0.0575088	0.0470404	-0.0373844	0.0754378	0.0346436	-0.0308743	-0.0186399	-0.00218233	0.0566118	0.0297138	0.00148738	0.0171584	0.0107287	-0.0175679	0.018966	-0.0504434	-0.0306316	-0.049998	0.0325075	-0.0557145	-0.0414679	-0.00762412	-0.0242692	0.00709669	0.0303802	0.0206215	-0.038767	0.0305273	-0.00711576	0.0914644	0.0142672	0.0152709	-0.0271035	-0.106794	-0.0965162	0.00934832	0.0372743
Fatty acid oxidation	-0.0176625	0.163801	0.0533971	0.100794	-0.0731054	0.0154665	-0.0344858	-0.0537471	-0.0556761	0.0586427	-0.000862636	0.0221707	-0.000535508	0.0515988	0.0458443	-0.00636515	0.020475	0.034575	-0.0154302	0.0339071	-0.032293	0.0488944	0.111714	0.0652079	0.0066962	-0.0320065	0.00255173	0.0415833	0.025636	0.00185463	0.0294851	-0.0512382	-0.0224735	-0.025168	0.0268008	-0.0266389	0.0858416	-0.0272441	0.00922139	0.00080183	0.0133118	0.0905831	0.0613047	0.0233517	-0.0173236	-0.0301914	0.0180861	-0.0506667	0.018875
Fe-S cluster biosynthesis	-0.050014	-0.0402279	0.0964822	-0.006396	-0.0956673	0.0295283	-0.220085	0.179015	-0.122511	-0.0483639	0.0524496	-0.00583674	0.0809807	0.116373	-0.176792	0.0637995	-0.0151628	-0.0338173	-0.0240111	-0.106571	-0.0818135	-0.156686	-0.0498931	-0.00189891	0.00944622	-0.0509574	0.0778121	0.0614562	0.0749649	0.0216904	0.1032	-0.012668	0.0507115	-0.242222	0.0168886	0.140634	-0.132733	-0.0515848	-0.206526	0.0347236	-0.0165265	0.0143073	-0.0442574	0.0349163	0.0731327	0.0190218	-0.189939	-0.139965	0.0121724
Fe-S-containing proteins	0.00608749	0.0353874	0.217872	-0.0351629	-0.0506373	-0.0436109	-0.101816	0.059876	-0.060985	0.0403918	0.083884	0.0146716	0.0567607	0.0505547	-0.0200952	-0.0151643	-0.0182824	-0.0132193	-0.0553046	-0.0576442	-0.104466	-0.117523	0.0522582	0.0114462	0.0231914	-0.117462	0.0125984	-0.0182899	0.0570616	0.0141933	0.139421	0.044735	-0.0252556	-0.0876613	0.00863528	-0.0148955	-0.0352734	0.0161319	0.0441696	-0.068913	0.0177204	-0.00327711	0.06104	-0.0244153	-0.0211672	-0.0759185	-0.00901704	-0.116209	-0.118285
Fission	-0.057708	-0.130108	0.00224109	0.0253218	-0.145278	0.0171872	0.0418391	-0.13841	-0.0974299	-0.0361057	0.014604	-0.0315824	0.0791728	0.0154292	-0.122424	0.00948773	-0.0491296	0.0828289	0.0822611	-0.0108754	-0.0353873	-0.00267879	-0.0783592	0.022354	0.0137555	-0.0315139	0.0780461	-0.0325659	0.0303812	-0.00287385	0.115379	0.120032	0.0166251	-0.280456	0.0856766	0.0814758	0.120186	0.0435709	-0.0905052	-0.0306761	0.00741138	0.0982446	0.0330699	-0.039303	0.0421351	-0.0193498	0.00194763	0.0352581	0.224514
fMet processing	-0.040807	0.0159584	-0.11505	0.00532569	-0.147859	-0.0138326	-0.11908	-0.2519	0.0560509	-0.0256873	0.102425	-0.0976084	0.0164128	-0.0215956	-0.00288904	0.0888295	0.0267551	0.117149	-0.0941034	-0.0957657	-0.0173482	-0.0643214	0.0760106	-0.149005	0.112287	0.105994	-0.000429968	0.123662	0.0370185	-0.0776016	0.153521	-0.146779	-0.144518	0.0363889	-0.0666478	-0.268315	0.0863588	0.0796967	0.141945	0.0542303	-0.0780696	-0.13538	-0.0804209	0.00962593	-0.0757997	0.0507755	-0.0100783	0.0142725	0.0383577
Folate and 1-C metabolism	0.101182	-0.0503074	-0.00936152	0.187017	0.0613933	-0.0375317	-0.0104151	-0.0136049	0.0828904	0.0341943	0.0129986	0.00750998	0.0505727	-0.00796444	0.00636905	-0.0842563	0.0572835	-0.0171518	0.0292888	0.0307725	-0.0389178	-0.057764	0.0515146	-0.1457	0.015863	0.0743977	-0.0984731	0.127399	0.0889905	0.101769	0.0736812	0.0562985	-0.082927	-0.184262	-0.176873	0.0395151	0.0424294	-0.0417729	-0.0499791	0.00346695	0.0642034	0.0523626	-0.117072	0.0141496	-0.0387242	0.0725424	0.124239	-0.0749647	0.00215364
Fusion	-0.00246692	-0.0704428	0.0881481	-0.0772537	-0.168573	-0.0190108	0.133579	-0.0625284	0.0433351	0.184075	-0.0227956	-0.0521257	0.0844792	0.0609436	0.0160725	0.150512	-0.0893645	-0.140021	-0.0178374	-0.0470936	0.177066	-0.107996	-0.0363387	-0.232824	0.0319168	-0.0160798	-0.0347092	-0.101454	-0.0491956	0.0497719	-0.121885	0.224529	0.116825	-0.203527	0.0539565	-0.0133908	0.0435811	0.0719713	0.102237	0.114563	0.152656	-0.00648304	0.168299	-0.193362	0.0229116	0.0619042	0.0347023	0.0752584	0.0480987
GABA metabolism	0.0921545	0.00817353	-0.0342724	0.214838	0.0225102	0.000321477	0.0278458	-0.0410927	0.0952296	-0.0271396	0.0845124	-0.0644648	0.0477187	-0.0426003	-0.0121618	-0.0577408	-0.0289823	-0.0117791	0.0458911	0.0431733	-0.111642	0.0576653	0.0516565	-0.0604185	-0.0251519	-0.017364	0.0989093	-0.0687429	-0.0348068	-0.0366639	-0.157165	0.060566	-0.0175618	-0.0191031	0.0804084	-0.0217918	0.166516	-0.0151414	-0.0632159	-0.0485046	-0.0596847	-0.134067	-0.0622607	0.0559512	0.109272	-0.162803	0.055956	-0.00407143	0.130932
Gluconeogenesis	0.00665838	0.119747	0.126592	0.0470554	-0.125264	-0.130082	0.0490698	-0.0178071	0.000863648	0.0225658	0.0968456	0.0391993	-0.0556516	0.0510065	-0.0474665	0.0756042	0.0632093	-0.0231337	0.104937	0.00978678	-0.0457754	0.0613546	-0.0106516	-0.037287	-0.0345571	0.0846414	-0.0154717	0.00134888	-0.00403863	-0.090767	0.0128579	0.114112	0.00500888	-0.0458929	-0.120692	0.117831	-0.0471842	-0.0498387	0.0800503	-0.103667	0.00691674	-0.0748423	-0.121097	0.0556353	0.0601254	0.0332659	-0.100474	-0.110406	-0.0867545
Glutamate metabolism	0.0837542	0.039608	0.0934214	0.117862	0.0292176	0.0194521	-0.000931952	-0.076625	0.123235	0.0173922	0.0687163	-0.0791291	0.12623	-0.093994	0.00530804	-0.206902	0.152249	-0.0892303	0.103683	0.0842418	0.0545278	0.0804722	0.139191	0.0805622	0.017602	-0.0435497	-0.0999057	0.0340516	-0.019157	-0.0971369	-0.0229539	0.187711	0.102024	-0.0052664	0.0616553	-0.177461	-0.158226	0.29976	-0.123415	0.0186091	0.0870257	-0.181394	-0.0749213	-0.112161	0.13467	-0.0290975	-0.127963	0.023384	-0.0354713
Glycerol phosphate shuttle	-0.0143502	-0.0539977	-0.0431507	-0.0512352	0.113063	-0.0966293	0.117621	0.093737	0.0922696	0.233938	0.0847539	-0.0758088	-0.0830142	-0.125583	0.00825682	-0.0607258	-0.226355	0.0504149	0.0899067	-0.0574536	-0.06584	-0.00290314	0.221912	0.00930371	0.140021	0.310334	0.0255066	-0.110803	-0.287782	0.0234263	-0.0563909	-0.231793	0.025906	-0.131672	-0.218024	0.0660008	-0.206456	0.211813	-0.015238	0.11388	-0.0764182	0.0692831	0.0449765	-0.0821122	0.0598935	-0.113582	0.0107699	-0.0858216	0.178891
Glycine cleavage system	0.0331996	0.0956524	0.117548	0.074775	0.0545813	0.156437	0.0149022	0.0295632	0.016426	0.0594907	-0.105504	-0.0228877	-0.0460249	0.0390184	-0.0552039	-0.0594376	-0.165284	-0.074668	0.00475681	-0.203252	0.0490306	-0.210037	0.0762839	-0.094826	-0.0198348	0.00730006	-0.102107	0.133154	-0.143628	0.0161487	-0.0478157	0.00987426	0.0431298	0.156545	0.247042	0.0561772	0.049822	0.0509511	-0.121492	-0.0927288	-0.0691124	0.021862	0.156363	-0.0899139	-0.0606026	-0.0932173	-0.0386585	-0.0210082	0.0371877
Glycine metabolism	-0.00640055	0.140271	0.0515252	0.176996	0.0118427	-0.00470925	-0.0515865	-0.0400741	0.0571606	0.00259114	-0.0307174	0.0303279	0.00803811	0.0380289	-0.0929212	-0.0492573	-0.0050664	0.0165983	0.0866496	-0.0627383	0.0278521	0.0191384	0.0652308	-0.00585157	-0.0233653	-0.0162289	0.019532	0.0980558	0.0414398	0.0139342	0.0525343	-0.0950712	-0.0703204	-0.0567572	0.110295	0.05582	-0.00414422	-0.0312067	-0.0146377	0.0583761	-0.0098428	0.0176484	0.0466917	-0.0292869	0.1174	0.0258013	0.0457986	-0.047162	-0.0499586
Glyoxylate metabolism	0.0230008	0.0655206	0.096974	0.173044	0.00647456	0.0346269	-0.0830372	0.00130623	0.123826	0.0223553	-0.166291	-0.0763426	-0.000889453	0.0954665	-0.21891	0.00883187	0.108971	-0.106091	-0.00423754	-0.00858089	0.0205542	0.128486	0.036119	-0.116036	0.0994953	0.0522313	0.148571	-0.076708	-0.0564057	0.0499684	0.015711	-0.125559	0.110898	-0.00897082	-0.0106086	-0.10921	0.0749739	-0.137507	-0.049246	-0.00264781	0.0783897	0.0246668	0.142514	0.0721075	0.035633	-0.0848144	0.136924	0.0790237	0.0926526
Heme synthesis and processing	-0.0133605	0.12277	-0.0373538	0.0791532	0.0788061	-0.110612	0.0944337	0.0858095	-0.111535	-0.0387343	0.0815545	-0.0985822	0.0156845	-0.122515	0.0307069	0.119675	0.00164009	0.218157	-0.19414	0.0392958	0.125952	-0.0768195	-0.0431434	0.0269932	-0.0593073	0.00050114	0.012203	0.158087	-0.0129733	0.167007	0.0940805	0.0861998	0.110159	-0.028493	0.00513748	0.0882071	0.00145049	0.0127036	-0.0392084	-0.0295121	-0.0427157	-0.109249	0.0610897	0.00702856	0.112211	-0.0366994	-0.00944426	0.0566473	-0.0458247
Heme-containing proteins	0.144747	-0.0378684	0.0661691	0.026996	0.0308231	-0.0700862	-0.0248414	0.0206433	-0.0116438	-0.0146445	-0.055385	0.0127936	-0.0186111	0.00531358	0.036491	0.0509633	0.00765829	-0.0189797	0.0108732	-0.00142837	0.0078478	-0.0478399	-0.0869035	0.0820291	0.0267857	0.0218313	0.0118047	0.0417382	0.0135965	-0.00502501	0.00369932	0.0562921	-0.0284115	0.0419339	0.0642779	-0.0502976	-0.00412922	0.0793508	0.037526	0.0702483	-0.0720574	0.00385308	0.0341815	0.0467853	-0.0214403	0.0471334	0.0918019	-0.00406944	0.0202724
Immune response	-0.0502346	-0.0179796	-0.0805384	-0.0474929	-0.01313	-0.0794971	0.0206862	0.0403931	-0.0774678	0.120361	-0.208694	-0.145142	-0.11742	0.229961	0.1641	-0.228735	0.177402	0.186054	0.144244	-0.176562	-0.0392264	-0.0300103	-0.0440948	0.0619283	0.118861	-0.00923876	0.033328	-0.0367989	0.205175	-0.104086	0.0240706	-0.0487922	0.289249	0.0542388	0.0436079	0.0626173	0.0954915	0.0474358	0.0548176	0.0504932	-0.0483556	-0.0701601	-0.129275	-0.0565214	0.0690478	0.0121781	0.0895735	-0.0209439	0.0917204
Import motor	-0.0485094	-0.0311533	0.0498586	0.0191797	-0.191644	-0.0304969	-0.114013	-0.010803	0.080875	0.0326847	0.258192	-0.116776	-0.161979	0.0344647	-0.0747757	-0.163799	0.0895606	-0.0691646	-0.00886617	-0.146207	0.0120356	0.0661607	0.0588603	-0.164035	-0.0600334	0.0578173	-0.117497	0.00350564	-0.0852998	0.157473	0.192871	-0.141054	0.180651	0.00385802	0.115834	-0.0379472	-0.217252	-0.0308222	-0.0443318	0.111815	-0.201454	0.0745514	0.0829217	-0.0197539	-0.00654694	0.0186511	0.232684	0.0829099	-0.180805
Intramitochondrial membrane interactions	-0.122403	-0.0158003	0.116486	-0.054163	-0.0548565	0.0204741	0.0718922	-0.0013485	-0.077582	0.00299503	-0.0453173	0.0321903	0.11656	-0.0753099	0.0127964	0.0154118	-0.0443648	0.0215401	0.0387287	0.0200116	-0.0816622	0.0350643	0.112266	0.0335063	-0.0349643	0.0594287	0.0229374	-0.00619864	0.0303342	0.126273	0.0415134	0.00739344	-0.0590519	0.0280679	0.109183	-0.0586529	0.0680628	0.118935	-0.0676656	0.109805	-0.0592732	-0.0419571	-0.0954066	0.0658675	-0.102949	-0.0895526	0.0609306	-0.0272822	-0.0149193
Iron homeostasis	0.0529548	-0.072704	-0.0665353	0.00237459	0.0421541	-0.0662806	-0.135482	0.00909024	-0.213574	0.148386	-0.113767	-0.0198907	0.0240171	-0.0690603	-0.0954484	0.0541835	0.1544	0.0385535	0.188022	0.112873	-0.0556802	-0.0599201	0.171161	-0.17548	-0.280142	-0.0732805	0.0109104	-0.0919967	0.058235	0.120978	-0.182569	-0.115914	0.149363	-0.0910304	-0.093579	-0.112387	0.059174	0.0589675	0.106673	0.125455	-0.106458	-0.0697585	0.00329827	-0.0668031	-0.214231	-0.00185947	-0.155743	-0.183227	0.0484257
Itaconate metabolism	-0.0321678	0.144253	0.0496063	-0.0473575	0.108991	0.0253625	0.0752156	0.064084	-0.00388511	-0.00668278	-0.030011	0.153925	0.0205746	-0.00332407	-0.108621	0.0574344	-0.0237018	0.127466	-0.0904569	-0.101499	-0.0303492	0.124712	0.163986	-0.0951374	-0.0175787	-0.0305377	0.144599	0.0293455	0.00851719	-0.1093	0.114872	0.0558377	-0.00866536	-0.113396	0.148118	-0.0699291	0.0195986	-0.0252289	0.0629853	0.0482882	-0.0160125	-0.0468648	-0.103297	-0.0871047	-0.0140899	0.00724252	0.0436347	-0.025075	-0.0216283
Ketone metabolism	0.00494068	0.160399	0.0488888	0.128902	-0.0352451	0.00189684	0.025452	-0.0230382	-0.0110872	-0.0138425	-0.0231863	-0.101479	0.00785089	-0.054884	0.0167673	0.0706681	0.0316324	0.125623	0.00460992	0.0526141	-0.00241463	0.0379016	-0.0156573	0.0301232	0.00905265	0.0500636	0.023014	0.0429029	0.0341174	0.0769345	-0.0187368	0.00580887	0.100184	0.00338674	-0.0572233	0.0539333	0.0231069	-0.0548755	0.0251993	-0.0347713	0.0290576	0.0782266	0.0515319	-0.0549095	0.0428197	0.0474955	0.0141332	-0.0299157	-0.0115645
Kynurenine metabolism	-0.0210471	0.0777173	0.189448	-0.0172416	-0.0165788	0.10744	-0.0460928	-0.0119538	0.0755464	0.0519418	0.0275125	-0.101693	0.0278776	-0.138393	0.0834166	-0.0184462	0.0960409	-0.0418546	0.0833574	0.0171586	-0.0164709	0.006001	-0.0361585	0.0395135	-0.044198	-0.103979	0.0532188	-0.0866387	-0.057208	-0.0462661	0.0482335	-0.102207	0.0349942	-0.0286967	-0.0108485	-0.0782036	-0.0646281	-0.096638	0.134777	-0.0567586	-0.0424965	0.0462917	-0.051341	0.0221715	-0.115292	-0.0756563	-0.195925	0.168515	-0.00461125
Lipid metabolism	-0.0195529	0.147215	-0.0363678	0.0971868	-0.0332128	-0.0254493	-0.0373497	0.13375	-0.125316	-0.0500376	0.0689922	-0.0765274	-0.00428853	-0.0751757	0.0981262	0.0230037	-0.00223941	0.0693911	-0.179453	0.0339444	0.0901436	0.0112316	-0.00886135	-0.00443317	-0.0463414	0.0732813	0.0613886	0.0375861	-0.00057943	-0.00319105	0.038644	0.150686	0.0710227	-0.0143583	0.0365837	0.0847578	0.0141185	0.040644	0.0571786	0.0349699	-0.0169299	-0.0750932	-0.015636	-0.0259989	0.0274983	-0.0634934	0.0196798	0.0436898	-0.0106537
Lipoate insertion	0.0866494	-0.0723569	0.0269412	0.124032	0.0408736	0.14702	0.0220043	-0.039299	-0.0389032	-0.00414961	0.0538973	0.0966236	-0.0402525	-0.000648517	0.0463429	0.0657833	-0.0737602	0.0371648	0.114582	-0.217223	0.0102337	-0.153503	0.0925266	-0.110896	-0.0957459	-0.112991	0.15247	0.217801	-0.193154	-0.000446506	-0.000373811	0.0393724	0.0569591	0.135678	0.0879092	0.184747	0.0499614	0.00693595	0.0854162	-0.0575765	-0.0214577	0.0314778	-0.141966	-0.0308821	-0.0762144	0.057575	-0.0858066	-0.0135448	0.0805667
Lysine metabolism	-0.00475704	0.164616	0.0819427	0.0877152	-0.0321768	0.0228061	-0.0138335	-0.0242056	0.0140177	0.0650661	-0.0285971	-0.000299649	0.051399	0.055893	0.00342337	0.0328108	-0.0324646	0.0184738	-0.0389179	-0.0606747	-0.0262342	0.0454149	0.0825467	-0.0379185	-0.067756	-0.06224	-0.00743232	0.125186	-0.00836278	-0.0786534	-0.122704	-0.0044395	0.0304928	0.0309681	-0.0207508	0.0190467	0.0929734	-0.000343158	0.0384987	-0.0126339	-0.0213522	0.0583102	-0.00613261	0.0368826	0.0184497	0.0180349	0.0212426	0.0757348	0.0110298
Malate-aspartate shuttle	-0.0158888	0.0836233	0.194828	-0.050238	-0.0579852	0.0040295	-0.0623369	-0.0187082	0.0756009	0.0727656	0.0635103	-0.0726642	-0.00762558	-0.109496	0.0880001	-0.00687184	0.04648	-0.0451356	0.0811634	-0.0119191	-0.000312515	-0.0183246	-0.00962884	0.0588624	-0.00471194	-0.0975014	0.0145223	-0.0509481	-0.0123582	-0.0388554	-0.0430739	0.00490793	-0.0560821	-0.0523409	-0.0127763	-0.0274679	-0.0176972	-0.054082	0.158065	0.0122681	0.00648472	0.0252866	-0.0275019	0.0393944	-0.0697299	-0.0695196	-0.074044	0.104636	0.0748925
Metabolism	0.144693	-0.032352	0.0675282	0.0406416	0.0312888	-0.0773714	-0.0351844	0.024822	-0.0289695	0.00104806	-0.0501382	0.0131608	-0.0175359	-0.00440681	0.0291541	0.0456604	0.0157385	-0.00710182	0.00944722	-0.00350641	0.00330613	-0.0422675	-0.0667479	0.0396304	-0.0030094	0.0182103	0.0070677	0.0175945	0.0338757	-0.00345577	-0.0222598	0.0272162	-0.011575	0.0249479	0.0335442	-0.0456217	0.00464013	0.0785598	0.0274921	0.0706239	-0.0565099	-0.0247605	0.0333618	0.0321448	-0.0270966	0.000322412	-0.0127768	-0.00680025	-0.0461659
Metals and cofactors	0.14463	-0.0374769	0.0653256	0.0295242	0.0335853	-0.0749398	-0.0324006	0.0244328	-0.028928	-0.00704834	-0.057963	0.0115696	-0.0152114	-0.00901071	0.027681	0.0583332	0.0210718	-0.00613762	0.019208	6.04509e-05	-0.00339386	-0.0469475	-0.0701724	0.0476876	-0.00542012	0.0159488	0.0101409	0.0241998	0.0303116	0.00252443	-0.0211388	0.0364059	-0.0145	0.0254369	0.0410445	-0.0426439	0.00769203	0.0731422	0.0222803	0.0761927	-0.0695957	-0.0174841	0.0395291	0.0351285	-0.0253613	0.0113079	0.00954595	-0.0059163	-0.0205973
MIA40	-0.0677164	0.0745234	0.00273427	0.0204178	-0.0743633	-0.14182	0.107521	0.00658751	-0.0828728	-0.275023	-0.0213903	0.12273	0.0254157	-0.000352691	-0.109916	-0.0320382	0.0469716	0.120364	-0.0962313	-0.0198756	-0.159028	0.0261726	-0.0153357	-0.0951362	0.0622833	0.0359807	0.0798741	-0.175992	-0.0090543	0.167304	0.0400524	0.0162981	0.00676024	-0.0280974	-0.00338786	-0.0946429	-0.111765	0.141177	-0.0603151	-0.132417	0.0833167	-0.0297292	0.122416	-0.00752963	-0.159879	0.0780376	-0.0271137	-0.0483109	0.0431819
MICOS complex	0.00545827	-0.0453616	0.20492	-0.0288413	-0.0617506	-0.0492257	0.130016	0.0682757	0.0463804	0.0292376	0.0786973	0.0893632	0.0245408	0.0910406	-0.0630205	-0.0360847	-0.0980949	0.0113498	0.0661817	0.0839564	-0.0292706	-0.0177209	0.0561546	-0.00178956	0.0138439	0.0265319	0.0415665	-0.0577665	-0.0129568	0.0625208	-0.0575773	-0.0311072	-0.0412931	0.0507017	-0.0636322	0.0204987	-0.0574168	-0.0830082	0.0134067	0.126522	0.00199691	0.0813359	-0.198069	-0.00117192	0.0969273	0.0754951	-0.0104242	0.095215	-0.172189
Mitochondrial dynamics and surveillance	0.0283317	-0.137836	0.0911782	0.0550715	0.0871483	-0.0636359	-0.0626674	-0.0188047	-0.124446	0.132603	0.0374212	-0.0450683	0.0786647	0.0958346	0.022939	-0.0703634	-0.0554182	0.109028	-0.000258014	-0.0350485	-0.00148662	0.0708313	-0.0454702	0.0353669	-0.054077	-0.013529	-0.00894036	-0.0353637	0.0396092	-0.00296242	0.0188552	0.00813896	0.0667584	-0.0694349	-0.0123271	0.00225087	0.0257179	0.0538398	-0.01873	-0.102407	0.0591841	-0.0114563	0.0147617	0.0763032	-0.0382104	0.00743303	0.0092367	-0.000485373	-0.0212133
Mitochondrial permeability transition pore	-0.0996103	0.0317449	0.0377222	-0.0709369	0.155416	-0.178896	-0.0740233	-0.0346633	-0.0657072	-0.0561133	0.0667534	0.116558	0.0225858	-0.0152517	-0.0131191	-0.0222653	0.00265552	-0.0524159	0.0958659	0.100692	-0.00195769	0.0481673	-0.0249077	0.0357105	-0.041861	-0.00294022	0.114316	0.109803	-0.00710604	0.03212	-0.0549184	-0.0232994	-0.00182817	0.0264005	0.000517014	-0.0133589	0.00174277	-0.0953035	0.0144476	0.0536938	0.144573	0.00679498	0.121555	-0.0318015	-0.053438	-0.0563472	0.0272484	-0.0202824	-0.00255263
Mitochondrial ribosome	-0.107971	-0.0831138	0.0813808	0.0419543	-0.0968024	-0.0185507	-0.0831994	-0.000490398	0.0775221	-0.029581	0.0460731	0.0430066	-0.16297	-0.00586794	-0.0187657	0.0538945	0.0200797	0.0707088	0.0127478	-0.0498354	-0.0473326	0.0436075	0.0139075	-0.0444407	-0.0729559	-0.0256621	0.0211931	-0.100259	0.048886	0.0599534	-0.0512295	0.0295137	-0.0118282	0.0310488	-0.106572	0.0717686	-0.0195521	0.00297717	0.0726205	-0.117095	0.0050808	0.0090937	0.0519553	-0.125729	0.0129954	-0.185031	-0.044817	0.12897	-0.0276807
Mitochondrial ribosome assembly	0.00150549	-0.151975	0.0802425	0.0909304	-0.00800127	0.00700966	0.110208	0.0158223	0.041806	-0.0147938	-0.0250853	0.0365543	0.129197	-0.0544292	0.109868	-0.0493221	-0.0144519	0.022203	-0.0261667	-0.0141982	0.0599352	0.0864179	-0.0478064	0.00550039	-0.0366539	-0.00464087	0.142969	0.044855	0.0407203	0.00478491	-0.0762047	0.0339509	0.109575	0.0918508	-0.108444	-0.087974	-0.00560778	0.00926498	-0.0470417	-0.106084	-0.133656	-0.116254	0.0852082	-0.063623	-0.0487555	-0.0359884	0.045959	0.107836	-0.0102825
Mitophagy	0.0231189	-0.144508	0.0672543	0.0395601	0.0316315	0.0307805	-0.113845	-0.104301	-0.00741434	0.106471	0.0735984	-0.00937929	0.0845043	-0.0794813	0.0645757	0.0990248	0.0831519	0.0817953	-0.181844	0.0220653	-0.136533	0.0240679	-0.0181862	-0.0544911	0.0219321	-0.00808217	-0.123466	-0.011628	0.0302949	-0.177391	-0.0317008	-0.0327949	0.0957723	0.0765676	0.018211	0.0625806	0.0102113	0.0457312	-0.0314596	-0.0387097	0.101157	0.070194	0.0615858	-0.0503494	-0.0375686	-0.0598578	0.0585745	-0.00696741	-0.137798
Molybdenum cofactor synthesis and proteins	-0.0160943	0.0972158	-0.0771868	0.0590014	-0.00885088	0.159121	0.0239677	-0.0295029	-0.0739275	0.164184	-0.0350083	0.172092	0.0181237	0.208244	-0.00872845	-0.066023	-0.112408	0.0072273	-0.0373974	0.0628779	-0.27369	-0.0050973	-0.0334414	0.17689	-0.170201	0.134224	-0.025244	0.102106	-0.138719	0.0174115	0.116044	-0.0219222	0.0269115	0.0995435	0.0281636	0.0777419	0.0560178	-0.0952267	-0.0777101	-0.0568811	-0.0637521	-0.152279	0.0927229	-0.0684798	-0.04088	-0.0184093	0.00880252	0.154448	-0.0501768
mt-mRNA modifications	-0.0732382	-0.121725	-0.00418048	0.0861329	-0.093309	-0.0522281	0.108562	-0.0662471	-0.0975672	-0.0394817	-0.0347925	0.0814247	0.119745	0.0235659	-0.0319223	0.0614673	-0.118807	0.0667034	0.0261512	0.0467788	0.110437	0.00851244	0.0418823	-0.06606	0.102449	0.0393684	-0.0355231	0.035705	-0.0563434	-0.00280375	0.0400827	-0.0587961	0.0159318	0.110701	-0.00136057	0.0114562	0.0261279	-0.00322021	-0.0101217	0.0592464	0.0357844	0.0513546	-0.0838122	0.00366252	-0.0960343	-0.0473118	-0.0865932	0.0342941	-0.0857511
mt-rRNA modifications	0.0505679	-0.151461	0.0761361	0.0725893	-0.0234501	0.00752207	0.0715784	-0.00419178	0.00356316	0.00397868	0.0339138	0.0604079	0.0990051	-0.0716363	0.0846025	-0.00912531	-0.0226321	0.0532502	0.0374041	-0.00510627	0.0970608	0.0669917	0.0014507	0.0130523	-0.00253732	0.011487	0.0530518	0.0674775	-0.0373037	0.0714772	-0.079584	0.00970155	0.132585	0.0406198	-0.062385	-0.163941	-0.00891398	-0.0539279	-0.0272038	-0.115676	-0.14241	-0.0451596	0.00715587	-0.075261	0.0585791	-0.0153735	-0.0551263	0.127737	-0.0265429
mt-tRNA modifications	-0.140685	-0.0517066	-0.0311472	0.0675976	0.0186143	-0.00496199	-0.0370659	-0.067503	0.0504993	0.00187789	-0.0672519	-0.0363778	-0.0379612	0.0119135	0.0582406	-0.00664018	0.00387795	-0.0502129	-0.0439542	-0.00713356	0.0575853	-0.0528109	-0.0750215	-0.011397	-0.0317847	-0.000357131	-0.0805369	0.0228889	-0.0369297	-0.00156567	0.0627687	-0.0576451	-0.147359	-0.0675973	0.0579844	-0.0570964	-0.050394	0.0808127	0.0140903	-0.0652069	0.0599724	-0.0370918	0.00973306	0.0593074	0.00546073	0.0113663	-0.100674	-0.0703175	-0.0761655
mt-tRNA synthetases	-0.138782	-0.0448862	0.0132392	0.0233707	0.027963	0.0490617	0.055787	0.0421688	0.0947698	-0.0131971	-0.0485286	0.0148984	0.0226811	-0.0594549	-0.105507	-0.0676402	0.112869	-0.0743825	0.0802214	0.10754	0.0331077	0.0233189	-0.0365797	0.0125288	-0.0774904	0.02833	0.0807477	0.0597978	-0.0688649	0.0495984	0.0135292	-0.0712029	-0.0245894	-0.0181643	0.0640189	0.133275	-0.00289725	0.0121979	-0.0617997	0.0704152	-0.0971538	-0.0366627	-0.15141	0.123763	0.0200032	-0.0184357	-0.0813406	0.0200162	-0.161458
mtDNA maintenance	-0.131161	-0.0827493	0.0112692	0.0882155	-0.0068314	-0.060391	-0.0081659	-0.00519949	0.0346931	0.0137246	-0.0375512	4.94038e-05	-0.024163	0.00166158	0.0272213	0.055198	-0.0333682	-0.0473544	-0.0241477	-0.018474	0.0818816	0.0289186	0.031391	0.0208836	0.107985	-0.00615625	0.0697468	0.0800149	-0.052808	0.0402789	-0.0481892	0.0121522	-0.00508969	-0.022622	-0.0204577	-0.0283465	0.035633	-0.025813	-0.0552797	-0.0158579	0.0805244	-0.00993757	-0.0228913	0.0461593	-0.0430706	-0.0132483	0.0732534	-0.0703474	0.00501423
mtDNA modifications	-0.0982424	-0.0877701	-0.0249629	0.0500741	0.0604307	0.0255477	0.101999	0.00566285	0.0973964	-0.0311723	-0.16789	-0.0709227	0.00715393	0.0798834	0.0843682	-0.0567762	0.111626	-0.0853888	-0.152071	-0.0589681	-0.0500704	0.0369951	-0.12043	-0.0862191	-0.0578996	-0.0968079	-0.0908927	0.124585	-0.0939208	-0.0285067	-0.0394617	0.00115542	0.0920923	-0.153832	0.00338116	-0.11508	0.0916876	-0.118789	0.0604945	0.303803	-0.132814	0.0353782	-0.0712098	-0.0450812	-0.10084	0.138591	-0.0686366	0.0090671	-0.148035
mtDNA nucleoid	-0.135146	-0.0638199	0.00936819	0.0642409	-0.0922012	-0.026842	0.011333	-0.0285222	0.0654881	-0.0506768	0.00917989	0.0208234	-0.0794661	-0.00123561	0.0210483	0.0146916	0.0281858	0.0131682	0.044721	-0.00462715	0.0807907	0.0416013	0.0252629	0.0425109	0.00836578	-0.0229042	0.0401542	0.0417685	-0.0156926	0.0911234	-0.0625036	0.096656	0.0290061	0.0142305	0.0326181	-0.0268232	0.00104699	0.0438232	0.0234284	-0.0830213	0.114711	0.0730148	-0.0885572	0.126283	-0.0289873	-0.100332	0.0457446	-0.0233022	0.0927086
mtDNA repair	-0.121837	-0.0859122	-0.00634546	0.081853	0.0541976	-0.0592794	-0.0302033	0.0244672	0.0379727	0.0686535	-0.0486111	0.00737874	0.0456809	0.0278176	0.00572011	0.116336	-0.0387449	-0.0499574	-0.048853	-0.0253528	0.0611449	0.0586997	-0.0303048	-0.0228941	0.150182	0.0207612	0.0854585	0.0718064	-0.0594604	0.0178369	-0.0270161	0.00668353	-0.0460384	-0.0290979	-0.0770929	-0.0263215	0.037459	-0.0338081	-0.0856622	-0.0551693	0.0198575	-0.0323189	0.0449017	0.0318076	-0.0388799	0.120399	0.174636	-0.0801051	0.0305368
mtDNA replication	-0.137672	-0.0715085	-0.0122654	0.0696363	-0.0384525	-0.0289865	0.0342577	-0.0285695	0.00595519	-0.0259687	-0.0641303	0.0101989	-0.0625384	0.0207577	0.026412	0.0487578	-0.0233505	-0.0312287	-0.0156472	-0.0119028	0.0931395	0.0429403	0.0139032	0.00579617	0.00997814	0.0256184	0.0739004	0.0778297	-0.0219106	0.0382569	-0.02524	0.026366	0.0345917	-0.00556852	0.0291874	0.0198842	-0.0136594	0.0518031	-0.023416	0.0465266	0.14991	-0.0263672	0.0124013	0.129971	-0.0469264	-0.0732668	-0.022146	0.0371321	-0.00656169
mtDNA stability and decay	-0.0429933	-0.0283914	0.101507	0.0231533	-0.0883403	-0.101198	0.027895	-0.0982172	0.108388	-0.0522145	-0.0411939	-0.0908118	-0.180829	-0.0840165	0.318033	-0.13133	-0.104573	-0.145408	-0.162311	0.0246514	-0.0538598	0.0147258	0.181979	0.154764	0.0898609	-0.104233	0.18048	-0.0901268	-0.112426	0.0944219	0.126424	0.0865874	-0.0254904	-0.0757574	-0.0804244	0.099963	0.243678	-0.091273	-0.109227	0.115096	0.153671	-0.0582991	0.0438525	-0.199702	0.00128951	0.0730157	-0.160446	-0.175026	-0.131007
mtRNA granules	-0.132878	-0.0644632	0.0830926	0.0591847	0.0173115	-0.0300776	-0.00286839	0.012267	0.0517601	0.0119648	-0.0814468	-0.00110654	-0.010707	-0.0466563	0.0446817	0.000510511	-0.0236462	-0.0324406	-0.0247063	-0.0221058	0.00577893	0.0276699	-0.0473848	0.0188515	-0.0383288	-0.0432305	0.0124114	0.0214737	0.0782219	0.0408694	0.00577621	0.0293688	-0.0779009	0.014679	0.0232939	0.0331021	-0.0397365	0.0320278	-0.0472417	-0.0601758	-0.0187122	-0.0168181	0.0415744	0.100241	0.021056	-0.0154164	-0.0450861	0.0049786	0.107414
mtRNA metabolism	-0.0836912	-0.129789	0.0819356	0.0936622	-0.0174854	-0.014734	0.0645835	-0.00328047	-0.00572911	0.00380824	-0.0649611	0.0353111	0.01746	-0.0499052	0.0392951	0.0225192	-0.049084	0.0193608	0.0219621	-0.0193079	0.1305	0.0288187	-0.0547247	-0.00465974	-0.0342675	0.0258485	0.00867727	0.0403785	0.0675622	0.0195351	-0.00120518	-0.0627847	-0.0156336	-0.00757706	0.0648305	-0.0841501	-0.070531	-0.0160051	-0.05313	-0.0763595	-0.0257364	-0.0224933	-0.0168186	-0.0469712	0.0333783	-0.00816118	-0.0655453	0.0115324	-0.0167333
mtRNA stability and decay	-0.0765557	-0.090697	0.132737	0.04805	0.0372096	0.0328301	0.0615917	0.0343905	-0.0723969	0.0527619	-0.0923545	0.0692368	-0.012154	-0.0724926	-0.019035	0.0690583	-0.0578639	0.00522298	0.0701355	-0.0498734	0.164974	0.0133475	-0.0301781	0.0384806	-0.0193162	0.0374928	-0.0505065	0.00415742	0.307446	0.0661078	-0.0191664	-0.154631	-0.0840314	-0.0102394	0.15301	-0.0203115	-0.128719	-0.121479	-0.0877596	-0.0809225	0.00127162	0.0617829	-0.153799	-0.328024	0.0173618	0.0681394	0.0155685	-0.0367767	0.0336152
NAD biosynthesis and metabolism	-0.0425451	0.0147309	0.0965563	0.153755	0.0112071	0.186815	0.0127534	-0.129166	-0.0153169	-0.0299071	0.0602552	-0.0872199	0.0735914	-0.0234473	0.0270646	0.119839	0.0674151	-0.0185525	0.163442	-0.0153216	-0.00209922	-0.27598	-0.118337	0.11578	0.208635	0.0853813	-0.0550808	-0.0210507	0.0104214	-0.093064	0.0468251	0.0525372	-0.0257968	0.0268366	-0.0523109	0.0421485	-0.120352	-0.0336771	0.192283	0.131661	0.0785286	-0.0459588	0.149341	-0.073027	-0.0650465	0.0377517	-0.0386263	-0.134354	0.0328389
Nucleotide import	-0.0906414	0.00461662	-0.0738221	-0.0305005	0.156163	-0.196773	-0.0606273	-0.0770923	-0.036595	-0.0539108	0.0648829	0.144383	0.00759125	0.0129554	-0.111755	-0.0131037	-0.0230294	-0.00653361	-0.0343155	0.0339167	-0.0229437	0.0162557	-0.112895	-0.0415093	-0.00160457	0.0686031	0.0849978	0.0411229	0.0440757	-0.00589694	-0.112312	0.0183918	-0.0176184	0.074894	0.00376356	0.0764126	-0.0702202	-0.0942921	0.0139648	0.10251	0.0882349	-0.00425999	0.0944673	-0.19727	-0.0392653	-0.113556	-0.0190803	0.0690495	0.0161179
Nucleotide metabolism	-0.0578324	0.0554765	-0.00918934	0.0508399	0.111937	-0.148551	-0.119786	-0.220356	0.0297891	-0.100293	0.0562591	0.195036	0.0209485	0.0228719	-0.119751	-0.104876	-0.0631533	0.105408	-0.0175616	0.0523491	0.151109	-0.0433112	0.0726089	0.00731138	0.113146	-0.0190293	-0.0488662	-0.168431	-0.0532512	-0.0218872	-0.0461322	0.0431435	0.0364704	-0.0170343	0.0666346	0.00235995	0.0345821	-0.109127	0.0733677	0.118377	-0.0934754	-0.0587979	0.0484161	-0.089763	0.028809	-0.0190212	0.0450517	0.0962395	-0.0170393
Nucleotide synthesis and processing	-0.0947088	-0.0307121	-0.0454892	0.0900287	0.121949	-0.0516366	-0.045586	-0.054567	0.00243445	0.0675403	-0.018355	-0.0285405	-0.0768342	0.139396	-0.0417051	0.159379	-0.23394	0.118146	-0.166768	-0.0955503	0.00914964	0.196014	0.100992	0.190777	0.0124003	-0.0575318	-0.176111	-0.113033	-0.0874698	-0.0588998	0.0918632	0.0329569	0.0357807	-0.0892468	0.00483685	-0.118283	-0.0100077	-0.0485029	0.213357	0.0237592	-0.0973224	0.0387053	-0.0534904	-0.0390155	-0.00147556	0.141178	-0.0796849	0.138072	0.0099835
Organelle contact sites	0.0638669	-0.121261	0.0809198	-0.00428396	-0.00265242	-0.0389427	0.0695788	-0.0774944	-0.125678	0.0845776	0.16494	-0.0530668	0.100249	-0.0357426	0.00925421	0.0321388	-0.0373076	0.000749874	0.0404111	-0.141827	-0.0571167	0.0724612	-0.0261628	0.0082526	-0.154619	-0.0602143	-0.145275	-0.092299	-0.0373881	0.0698193	0.0431361	0.00405227	0.0284255	-0.0419103	0.122575	0.0806708	0.0578218	0.115546	-0.034828	0.124265	0.27131	-0.079299	-0.042716	-0.0355241	0.0418844	0.103283	0.154198	0.0975319	0.135814
OXA	-0.122206	0.0313316	0.0668367	-0.0468969	0.0428861	-0.00831202	-0.148331	-0.0205174	-0.00543749	0.0464046	-0.0542482	0.098207	0.0513802	0.0236721	0.0346507	0.0379431	0.0782589	0.0383332	0.159786	0.0236957	-0.0578159	0.0031351	-0.259	0.0369505	0.0290889	0.00898587	0.079681	0.00318946	-0.16164	-0.0125753	0.0633807	-0.00686147	-0.0701118	-0.145269	0.0470717	0.0847322	0.0519841	0.0681113	0.0341467	0.139511	-0.0792192	-0.0861265	-0.047095	-0.176183	0.0254353	0.0214875	-0.0518723	0.112446	0.0831805
OXPHOS	0.148303	-0.0303695	0.0585928	0.0282181	0.00126994	-0.0774834	-0.0328394	0.00801142	-0.00275015	-0.0188685	-0.0473427	0.00841543	-0.0504659	0.0297299	-0.00616466	0.0440752	0.0106554	-0.0137475	-0.00545998	0.00687723	0.0148658	-0.00823236	-0.0471352	0.0675725	0.0248086	0.0222555	0.0415574	0.0253113	-0.02999	0.0238496	0.0322365	0.0150724	-0.0164268	0.0335871	0.0490263	-0.0203535	-0.0287353	0.0708547	0.0199418	0.0372617	-0.00800473	-0.00639626	-0.0472103	-0.0241844	-0.0016801	0.0144704	0.0530777	0.0332416	-0.0100372
OXPHOS assembly factors	-0.00170921	-0.128179	0.12992	0.0643888	0.0571762	0.0671878	0.0516056	0.0345679	-0.0782186	-0.0980123	0.108292	-0.0561279	-0.0940547	0.0769549	-0.0859456	-0.0531529	-0.0466119	0.0749135	-0.0225031	0.0485068	-0.114355	0.0312249	-0.055536	-0.0318621	0.0383648	-0.0537295	-0.0658144	-0.00148078	0.00810413	0.0120844	0.00987041	0.0414981	-0.0326887	0.0598235	-0.0712218	-0.0561695	0.00191242	0.0020499	0.0205609	0.00425422	-0.0516426	-0.0342251	0.077118	-0.148575	-0.0287893	0.0367957	-0.0211907	-0.0638594	0.0453683
OXPHOS subunits	0.14831	-0.0302401	0.0584237	0.0280234	0.00119797	-0.077602	-0.033017	0.00799789	-0.00283898	-0.0189737	-0.0476964	0.00852333	-0.0503558	0.0293794	-0.00628044	0.0447308	0.0109601	-0.0140066	-0.0048596	0.00725723	0.0147661	-0.00859898	-0.0473839	0.0683271	0.0250077	0.0222241	0.0422464	0.0255421	-0.0305322	0.0239856	0.0324841	0.0158203	-0.0165854	0.0335881	0.0499102	-0.0202945	-0.0292297	0.0705869	0.0199102	0.0376718	-0.00858821	-0.0060258	-0.0478405	-0.0239651	-0.00135953	0.0150228	0.0551771	0.0339498	-0.00833934
Phospholipid metabolism	-0.0273465	-0.0278309	-0.0208698	0.0735004	-0.0493129	0.0499712	0.00694609	0.0342298	-0.151291	0.193544	-0.0473926	0.0514492	-0.0386888	-0.272587	-0.161229	-0.275112	0.159436	-0.140623	-0.283595	-0.198112	0.122686	0.0208599	-0.159624	0.0304363	-0.0438952	0.256516	0.107179	-0.107813	-0.0497524	-0.11984	0.0766798	0.255672	-0.0571882	0.0195573	-0.0553516	0.0484113	0.0447347	-0.0814124	0.140708	0.0216652	-0.118953	-0.0124216	-0.0556987	0.0156873	-0.0910109	-0.0272403	-0.0129534	-0.00616975	0.139267
Polycistronic mtRNA processing	-0.139892	-0.028137	0.0504232	0.0529618	-0.00229951	-0.00174502	0.0376489	0.0245595	0.105323	-0.0181476	-0.115249	-0.0167497	-0.0658138	-0.0579361	0.0779209	-0.0170543	-0.0276671	-0.0870503	-0.0630876	0.0114713	0.00159621	0.0302447	-0.0506883	-0.0194646	0.0277814	-0.0538985	-0.026929	0.0312153	0.13346	0.0288571	-0.0991504	0.0560409	-0.02986	0.0497792	-0.00321078	0.0403981	0.0133551	0.032089	-0.035368	0.00347692	-0.0628251	-0.0202628	-0.05595	0.0217249	-0.0605255	0.0241556	0.0271182	0.0791291	0.136873
Preprotein cleavage	-0.0614579	0.0729432	0.181084	-0.0799224	0.0653684	-0.0144092	0.0373476	0.0502684	0.0162555	0.0874702	0.0273026	0.0436004	0.0561748	0.018	0.0335664	0.0289462	-0.0163446	0.00707644	-0.0312517	0.00582127	0.0724643	0.02156	-0.0625328	0.0334991	-0.00944051	0.0119393	0.0887323	0.0528377	-0.0455613	-0.0274156	0.0309461	-0.0268349	-0.0539904	-0.0355419	-0.0410362	0.046457	-0.0210454	0.0482692	0.131984	0.0194544	-0.0570987	-0.153815	0.108875	0.116172	0.0188323	-0.0153768	0.107263	0.0148237	0.0228927
Proline metabolism	-0.00944673	0.0591126	-0.078118	0.0187581	0.0936659	-0.152922	0.150141	0.0328131	-0.061661	-0.0233759	0.226212	0.156892	0.0767534	-0.0282866	0.0517097	0.147167	0.132616	-0.234744	-0.180729	-0.106618	-0.05242	0.0227025	0.0151487	0.139819	-0.127081	-0.0345055	0.0274486	0.0291059	0.169441	-0.0627796	-0.068408	-0.0919018	0.00787773	-0.173508	0.0260063	-0.101297	-0.139553	0.00749272	-0.0862993	0.0706862	-0.176027	0.106806	-0.0858939	-0.106345	-0.0864985	-0.0102949	0.0201623	-0.0535918	0.0742014
Propanoate metabolism	-0.0224775	0.0606423	0.00200872	0.115041	0.0454554	0.25505	-0.0273318	0.00913965	-0.12501	-0.119091	0.108701	0.0748033	-0.178808	-0.0120356	-0.00780508	0.08126	0.0558112	0.0858223	0.194973	-0.0412447	0.15807	0.0251773	0.0510816	0.0803997	0.0522415	0.0822724	0.0918162	-0.0199127	0.0522381	-0.00119477	0.0443193	0.0555864	-0.00866715	-0.0804437	-0.079644	-0.0567283	0.0542528	0.106035	0.0894385	0.038609	0.122428	0.132057	-0.0137739	-0.0205454	-0.164765	0.0942139	0.116224	-0.0601106	-0.117208
Proteases	-0.142733	-0.0495216	0.00169761	0.0530704	-0.0552823	-0.0248997	0.0554704	0.0196738	-0.0308286	-0.0587387	-0.0653562	-0.0290218	0.0508346	0.0188489	-0.0382942	-0.00127715	0.0541156	-0.0536878	0.0188886	0.041252	-0.00953926	-0.0381289	0.0690157	0.0301235	-0.0503622	-0.0773303	-0.000352994	0.0223962	-0.0703296	-0.0169532	0.0233535	-0.0425146	0.0192591	0.0934326	-0.0873175	-0.010849	-0.000134778	0.0552478	-0.0189048	0.101466	0.129752	-0.108867	-0.0728105	0.00542925	-0.148929	0.0331527	0.117789	0.0590778	-0.022118
Protein homeostasis	-0.110008	-0.0841403	-0.00491924	0.112505	-0.0241926	-0.00451717	-0.0943166	0.126386	0.0675522	-0.0711405	-0.0177351	0.0322899	0.041047	-0.00512544	-0.0408587	0.00628189	0.083453	0.0408944	-0.0427159	0.0457911	0.00876708	-0.0320946	0.0913153	0.0599978	-0.0429901	-0.0363859	-0.0936158	-0.0750966	-0.066025	0.0446695	-0.0332497	-0.0725994	-0.00760795	0.134852	-0.0104788	0.0714224	0.00972997	0.0514041	0.0382223	0.0325705	0.0708693	-0.0715331	-0.117351	-0.0169946	-0.138104	0.0904631	0.0197231	-0.00567314	0.0505733
Protein import and sorting	-0.0784591	-0.116046	0.112255	0.0378848	0.0438632	0.000652098	-0.0700663	-0.00705813	0.0617605	0.0967455	0.0766813	0.0768427	-0.0334311	-0.0347901	0.0564263	0.0935081	0.0912958	0.0260728	-0.0658604	0.0849402	-0.0325884	0.0145538	-0.0402108	-0.0131574	0.0596292	0.0945031	0.0564063	0.0217112	-0.0455462	-0.0919392	0.0506552	-0.0574624	0.0559151	-0.058096	0.126478	0.027353	0.0223401	0.0646085	-0.0246584	-0.00855474	-0.0419287	-0.0154457	0.0550238	0.0948209	0.0496126	-0.0315086	0.0444976	-0.0367471	-0.017047
Protein import, sorting and homeostasis	-0.0984801	-0.109725	0.0649765	0.081853	0.0195388	-0.0026602	-0.0922742	0.0824541	0.0841661	0.0326411	0.0445208	0.0730522	0.00439826	-0.0249942	-0.000932892	0.0584435	0.110153	0.047359	-0.0670345	0.0726254	-0.0123434	-0.0131858	0.0216027	0.0283877	0.0102489	0.0362927	-0.0126479	-0.0322314	-0.0694692	-0.0236148	0.0113733	-0.0757102	0.0180965	0.0274299	0.0593725	0.0739442	0.0138212	0.0696132	0.0019737	0.00776145	0.0190613	-0.0229616	-0.0401649	0.0476679	-0.0729247	0.0301898	0.0322335	-0.0708209	0.0393351
Pyruvate metabolism	-0.0258395	0.0727607	0.152236	-0.0924728	-0.0810414	0.0604266	-0.0722319	-0.0980638	-0.0440527	0.0702274	-0.0207325	0.136256	0.0771023	0.0445091	0.134692	0.00475057	-0.0286105	0.0795876	-0.0451289	0.0244352	0.106859	0.0402065	-0.118825	0.0156114	0.0102219	-0.134388	-0.0714844	-0.0992536	-0.0770449	0.0260666	0.11429	0.0462655	0.197151	0.076918	-0.185465	-0.0394525	-0.150799	-0.145823	-0.273266	0.0918708	-0.0431146	0.137245	-0.0616607	0.203265	0.0368898	0.000957714	0.0638617	-0.0319523	0.128638
Q-linked reactions, other	-0.027713	0.150042	0.062136	0.0827695	0.0203849	-0.105187	0.0278748	0.0442633	0.0115942	0.0812029	-0.0186112	-0.0366693	-0.0762677	-0.00253113	0.0853531	-0.0667358	-0.104532	0.113841	0.0310916	0.0757259	0.0645969	0.0736654	-0.0326466	0.0101647	-0.145572	-0.0434072	-0.0177906	0.021514	0.100458	-0.051243	-0.0681722	-0.0905982	-0.107373	-0.0147762	-0.0171496	0.0956659	0.00532559	0.111479	0.089321	0.113448	0.00404696	0.0989322	0.148271	-0.0724042	-0.0154528	-0.0191776	0.131882	-0.00236958	-0.147323
Respirasome assembly	-0.0559439	-0.00439908	0.0122748	-0.0554434	0.0680257	-0.0787567	-0.049907	0.170188	0.00244916	0.0736442	0.0719656	-0.297229	-0.179134	-0.105819	-0.262537	0.0782822	-0.036945	0.166867	0.0716841	0.194883	-0.020232	0.0681355	-0.0796988	-0.106664	0.0431417	-0.130615	-0.0970942	0.0747819	-0.000838603	-0.0380563	0.0810649	0.203222	-0.145509	0.0659558	0.08163	-0.0713414	0.14356	-0.090381	-0.27099	0.14458	-0.078559	-0.0260478	-0.0133043	-0.00320785	-0.0433465	0.0311815	-0.0353818	0.0195315	0.123224
ROS and glutathione metabolism	-0.00978888	0.00963688	-0.0111306	0.156932	-0.128401	-0.0143639	-0.109728	0.0344987	-0.269628	0.162321	-0.0166567	0.0222027	0.0166135	-0.172337	-0.0995338	-0.164924	-0.0771109	-0.106741	-0.0929591	0.00632306	-0.0324054	-0.0625254	-0.0671079	-0.00534023	0.0732935	-0.0830248	0.111081	-0.0728873	0.00786817	0.0458263	-0.0989628	-0.107251	-0.111376	0.0794193	0.0075797	-0.117729	0.0155535	0.0119957	0.0390308	0.039945	0.0642963	0.00991136	0.0206641	0.0796295	0.123874	0.0834011	0.0165885	0.0115714	-0.089058
SAM	-0.0845004	-0.0510165	0.0922601	-0.0215993	-0.106981	0.0724777	0.133811	0.00452913	-0.10745	-0.0791138	-0.00817557	0.106047	0.116663	-0.104933	-0.00522293	0.0598371	-0.130324	0.0888828	0.118182	0.04241	-0.165994	0.0698316	0.0658047	0.0602902	0.0653816	0.261767	-0.0166811	-0.041125	0.128873	0.00463251	0.0959021	0.0975936	0.0197822	0.0437495	0.0797147	-0.0463514	0.142667	0.204261	0.0531426	0.132495	-0.119046	0.0983313	0.000648383	0.179775	0.0838971	-0.0546267	-0.0708981	0.0108306	-0.0553343
Selenoproteins	-0.0170329	-0.0540205	-0.0125606	0.0926727	-0.243174	-0.0350612	0.148225	0.0958848	-0.0893973	0.0635272	0.00068745	0.122484	-0.0619433	-0.00134677	-0.0783609	-0.065071	0.0722116	-0.0583578	0.0593154	0.194456	-0.0887894	0.0335339	0.0707206	0.00953747	0.0796822	-0.0754932	0.0356403	0.149366	-0.0625079	-0.166891	0.0579166	-0.120935	0.116447	-0.0027373	0.108841	0.00301791	0.00357101	-0.0310508	0.0398614	0.0850315	0.165048	0.0311071	-0.0492598	-0.114371	0.150068	0.178279	-0.172375	0.172342	0.0722435
Serine metabolism	-0.00917871	0.098323	-0.0157182	0.219883	-0.00487392	0.00855943	-0.0108068	-0.0643419	0.0281695	-0.036114	-0.00848146	-0.189986	0.039848	-0.0632751	0.0503621	0.0427243	0.0559422	0.0579546	0.110033	0.0487009	-0.0705607	-0.0617615	-0.145044	0.137267	-0.0716802	0.0756129	-0.0512992	-0.0265929	-0.0354781	0.218155	-0.00939898	-0.0277203	0.0392818	0.0223187	-0.0751853	0.0219935	-0.0320236	-0.0956403	0.00997995	0.0173604	-0.0174854	0.084219	0.0339183	-0.0157091	0.0237971	-0.0348433	-0.0507368	-0.00754826	-0.021687
Sideroflexins	-0.00775005	-0.0626031	-0.00940599	0.15122	0.235502	0.026651	0.0458431	0.00890707	-0.0390367	-0.0815934	0.0164709	-0.0910047	0.128518	0.0827738	0.076832	0.0270475	-0.00156076	-0.0063188	-0.122964	-0.0674691	0.0966382	-0.0400035	0.124079	0.110637	-0.136175	0.046886	-0.118717	-0.124456	-0.030395	0.0490935	0.0448534	0.018287	-0.102811	0.042336	0.049399	-0.154699	-0.0347089	-0.123007	-0.0428866	0.241237	0.15985	0.131379	-0.144945	0.0305126	0.227301	-0.187861	-0.0886873	0.0566805	0.0910802
Signaling	-0.104601	-0.00672579	0.0282324	-0.0952363	0.098169	-0.167491	-0.0627589	-0.00690566	-0.0536014	0.0851915	-0.0148784	-0.0361934	-0.0241974	0.126016	0.108047	-0.148108	0.157591	0.0682531	0.116102	-0.0623267	-0.00872213	-0.0108108	0.0489664	0.0217015	0.0696593	0.0852993	0.119886	0.0418143	0.115043	0.0286045	0.00951304	0.0880992	0.0632442	0.0843842	0.0404871	0.00353277	0.0285305	-0.0370171	0.0252278	0.019353	0.0493854	0.026148	0.0512699	-0.0494711	0.000124113	0.0376098	-0.0225535	0.0677822	0.0643255
SLC25A family	-0.111551	-0.0238257	-0.0138421	0.0267322	0.122854	-0.158625	-0.0988656	-0.106431	-0.0550481	-0.0136693	0.0759376	0.0304075	-0.0335462	0.0331208	-0.0623888	0.0253932	-0.00530759	-0.0613012	-0.0125036	-0.0418095	-0.131288	-0.214586	0.0332886	-0.0352286	-0.034638	-0.0462139	0.0260662	0.150691	-0.113473	-0.0687487	-0.0983324	0.106891	0.0439142	0.108423	-0.0820157	-0.0552475	-0.0260637	-0.0161336	0.0483751	-0.0379925	-0.0227016	0.128718	-0.0224094	-0.0668914	0.100758	0.00293333	-0.0245431	0.0147711	0.0159418
Small molecule transport	-0.121048	-0.0162866	0.0739312	0.00422016	0.115797	-0.112299	-0.0650794	-0.0933488	-0.0673512	0.0086134	0.0961513	-0.0272411	0.016025	0.061755	-0.0449831	0.00289282	-0.00730046	-0.0835263	0.0378693	-0.0137332	-0.0359655	-0.0835929	-0.000343016	-0.0368282	-0.0809489	-0.0607392	0.0702599	0.116403	-0.121935	-0.0591783	-0.0225258	0.0630602	-0.00307921	0.138757	-0.0583745	-0.0349507	0.0208132	0.0473766	0.0497364	-0.0303308	-0.000716339	0.153793	-0.0933875	-0.000568086	0.139258	0.0236427	0.0166537	-0.0698532	0.0628871
Sulfur metabolism	-0.0618662	0.12982	0.00382098	0.00214102	0.0326373	-0.0239658	-0.0262903	0.0215373	-0.0338192	0.0388744	0.0677153	-0.11836	-0.171925	-0.283507	-0.0289785	0.0439419	-0.0662236	0.214204	0.0037742	-0.00202124	0.0656694	-0.049905	-0.0847273	-0.108479	-0.00605032	-0.0200668	-0.0164021	-0.0198149	0.0434112	-0.100206	0.0289275	0.0317176	0.0307045	0.0619585	-0.0969354	0.0257355	0.0633428	0.0140177	-0.0804094	0.0568779	-0.000175055	0.0842912	-0.161543	-0.134512	0.077088	0.0162044	0.0519985	0.119862	-0.132295
TCA cycle	-0.0552069	0.104458	0.17007	-0.0701694	0.0447024	-0.0242941	-0.00936662	0.0467616	0.0229025	0.0853559	-0.0323768	0.0525884	0.0297076	0.0188629	0.0280939	0.0253054	-0.00610999	-0.00807469	-0.00155887	-0.0242494	-0.0165645	0.0228602	0.0604686	-0.000590204	-0.0373899	-0.0410479	0.0170008	-0.00527061	0.0230023	-0.0175867	-0.0122473	0.0417339	-0.04576	-0.0769517	0.0691752	-0.0572438	0.0106525	0.022406	0.0740922	0.00728605	0.0125001	-0.013302	-0.00114431	-0.00477771	-0.0809443	-0.102836	-0.0310712	-0.0075616	0.0137111
TCA-associated	0.0253573	0.102114	0.0918444	0.0949398	-0.0702292	-0.137795	0.149732	-0.0311433	-0.0820169	-0.0319041	0.0147573	0.0141943	-0.0497793	0.141502	-0.053112	0.120153	0.0273875	-0.073648	0.00551904	0.0396487	-0.0513988	0.0491866	0.0173384	-0.101193	-0.0216648	0.110562	-0.0435593	-0.129849	-0.0621521	-0.226322	0.0266918	0.159611	0.0240955	-0.0120842	-0.161029	0.0924538	-0.0924799	-0.10903	0.0517588	-0.150039	0.0106993	-0.231673	-0.249957	0.0180219	0.00619671	0.0375574	0.0626363	-0.051475	-0.0291942
Tetrahydrobiopterin synthesis	0.135097	-0.0707698	0.0159034	0.074378	0.0523904	-0.0386735	0.00990034	0.0277945	0.00569357	0.0232345	0.011709	0.0117035	0.0105154	-0.0330664	0.0556176	-0.058138	-0.0303801	-0.00800787	0.00360089	-0.00810137	-0.0357085	-0.0444325	0.024379	-0.139704	0.0152658	0.0441814	-0.0473175	0.0272734	0.0726708	0.0504818	-0.0321681	0.123928	-0.0482159	-0.169167	-0.100477	0.0133957	0.0816432	-0.0403597	-0.0190855	-0.0551104	0.0600613	0.0474513	-0.0224027	-0.00864773	-0.0772364	-0.0188577	0.073537	0.0670497	0.112834
TIM22 carrier pathway	-0.12228	-0.0567652	-0.0455497	-0.0312112	-0.0644236	0.0529608	-0.00258163	-0.0677689	0.0571677	-0.0318121	0.0303984	-0.11625	-0.14653	0.147875	-0.0875802	0.0390768	0.0523861	-0.0138733	-0.0535437	-0.0668191	-0.0264257	-0.0126764	-0.030213	0.0931889	-0.076156	0.110679	0.0109258	-0.0690144	0.194266	0.0474633	0.000675424	-0.00378606	-0.0854374	-0.0891658	0.109749	0.0128394	0.0601049	0.0601889	0.140142	-0.0678276	0.0834735	0.00604666	0.00273966	-0.0609592	0.158463	-0.200594	-0.0677922	0.0472068	-0.0337529
TIM23 presequence pathway	-0.058359	-0.108109	0.0884666	0.0746679	-0.100712	-0.0524567	0.0412839	0.0292923	-0.0135469	0.0296419	0.0874365	-0.0261841	-0.194817	0.0196777	-0.132525	0.0378409	-0.0655278	-0.136165	0.0158946	-0.0538798	-0.0597086	-0.074531	0.169018	0.0980342	0.0339373	-0.0845349	-0.155926	-0.0334849	0.127327	0.0409643	-0.0253335	0.0952075	0.0895992	0.0772504	0.0991741	-0.00209718	-0.0927469	-0.202843	0.0987551	0.0730268	-0.0342935	-0.0895559	0.0803726	0.176754	-0.129275	-0.103856	0.0961928	-0.00140979	0.0816627
TOM	-0.0119133	-0.147276	0.0228823	0.0710201	0.0857228	0.0226288	-0.111988	-0.0148013	0.0892816	0.114309	0.0749752	0.0740982	-0.0293023	-0.0434922	0.0698816	0.117777	0.133521	0.0540459	-0.0933145	0.119411	-0.0365477	0.00640799	-0.0521146	-0.0394931	0.0650907	0.0806906	0.0908689	0.0130646	-0.0794933	-0.131551	0.043115	-0.0945228	0.0752244	-0.0921033	0.118183	0.0433802	0.0367594	0.0501212	-0.133138	-0.0715531	-0.0152694	0.125964	-0.00330314	-0.00185217	0.0650243	-0.0153379	-0.0331129	-0.087397	-0.00209881
Trafficking	-0.0570347	-0.0587677	-0.0654076	-0.0568809	-0.0239003	0.190779	-0.0989256	0.0232564	-0.0722635	-0.110815	0.188537	-0.159551	0.199958	0.0983517	-0.118031	-0.00648025	0.0561449	-0.0109131	0.06962	0.00847747	0.0244148	0.0820399	-0.0377533	0.124838	-0.112011	0.0365086	0.138135	-0.0572751	-0.115636	-0.0470646	-0.0737369	-0.0126208	0.0107442	-0.078046	0.00306037	0.00583778	0.059203	-0.0513903	-0.0779946	0.0987889	0.0795599	-0.0991387	-0.0401208	-0.0790652	-0.0971807	-0.0610695	0.207383	0.145097	0.0261776
Transcription	-0.122441	-0.0108696	0.0257428	0.0758349	-0.128188	-0.127925	-0.0202885	-0.0724019	-0.050074	-0.0474378	-0.051054	-0.0234933	-0.100651	-0.00117776	-0.00131299	0.0423249	-0.0931177	0.0506775	-0.0464002	-0.0997019	0.0847725	-0.0047249	0.000852901	-0.0708595	-0.0531558	0.0482699	-0.0195034	0.109569	-0.0275014	-0.0335916	0.056432	-0.0875908	0.0275	-0.00653311	0.0105631	-0.0511866	-0.0519306	0.0063647	-0.0442902	-0.0198309	0.121732	-0.053238	0.0431356	0.0645395	-0.142829	-0.0540375	-0.0635436	0.00461509	-0.00397365
Translation	-0.103119	-0.105936	0.0937998	0.0606025	-0.0421719	0.0170829	-0.0208042	0.0225667	0.0737346	-0.0305733	0.0382673	0.0570309	-0.117012	-0.0363247	-0.0282117	-0.00682807	0.0697025	0.0252153	0.0478255	-0.0120564	0.00183351	0.0482183	-0.0351471	-0.0347002	-0.0446502	-0.00971986	0.0728952	0.00271899	0.0310501	0.0364737	-0.00752887	-0.000974419	0.00528672	0.0026524	-0.0410713	0.0753576	-0.0618261	0.00296502	0.0332003	-0.0226833	-0.0892062	-0.0581638	-0.0265507	-0.0803851	0.0519322	-0.0962015	-0.0754069	0.0517285	-0.0494506
Translation factors	-0.0688171	-0.0570358	0.0891915	0.0560335	0.156932	0.152086	0.062213	0.0169107	-0.00841982	-0.122955	0.0617879	0.0994387	-0.170768	0.0442057	0.0083542	-0.126241	0.0461065	0.042281	0.040488	0.00626573	0.0201764	0.131927	-0.0896384	0.0144099	0.0481813	-0.0601214	0.0180085	-0.075327	0.0138222	-0.132407	-0.0514291	0.0643775	0.0528169	-0.043001	-0.0250473	-0.126577	-0.0555668	0.0362424	-0.0368952	0.0943205	-0.0633161	0.0476452	0.0924135	0.11231	-0.0180889	0.134699	-0.0704887	-0.0833916	-0.053896
Type II fatty acid synthesis	-0.0301404	0.0192304	0.108285	-0.0844339	0.0135432	0.0671594	-0.0477551	-0.169874	-0.18384	-0.193942	-0.041403	-0.20508	-0.0702066	0.0688453	0.0950444	0.043405	-0.0610415	-0.123659	-0.124583	0.113436	-0.0618388	0.0206651	-0.0876421	-0.228738	-0.0686717	0.0781139	0.0306242	-0.0743557	-0.00452471	-0.00422837	-0.213863	-0.0973103	0.0631672	-0.00167571	-0.0105811	0.0902163	-0.0402597	0.0569001	0.0246475	0.167525	-0.0469362	-0.10325	-0.0176443	0.132763	0.0932716	0.0574823	-0.084426	0.0791219	0.00132601
Urea cycle	-0.000374326	0.123491	-0.0319633	0.168945	0.0172515	-0.0568797	0.0834454	-0.0446408	-0.0479053	-0.0664636	0.109198	-0.0945759	0.0897321	-0.0521411	0.102095	0.0959863	0.0878698	0.00131405	0.0047381	-0.0223421	-0.10927	-0.0352378	-0.124999	0.0956585	-0.0699469	0.0652003	-0.0112578	-0.0396245	-0.0998692	0.211304	-0.0432308	0.00519246	0.108726	-0.0236336	0.0589006	0.00510166	0.00760413	-0.0638721	0.0221872	-0.0319704	-0.0845868	-0.0328223	0.0696208	0.0313963	-0.0534574	0.0151027	-0.0406746	-0.0157674	0.0623978
Vitamin A metabolism	-0.0314462	0.0751958	-0.0712345	-0.0678333	0.0574903	-0.140071	0.136576	0.0396595	-0.0918065	-0.0468328	0.151799	0.00841685	0.0109076	-0.000661623	0.0930554	0.00992841	0.0806037	-0.0940184	0.132725	-0.272048	-0.0733399	0.276581	-0.215242	-0.130358	0.21929	-0.0912982	-0.130373	-0.160869	-0.148377	0.0316939	0.01716	-0.0692021	-0.0348064	0.167248	0.242677	0.0573235	0.116154	0.025324	-0.00641804	-0.0753508	0.0281258	0.0489663	-0.0126489	0.0087281	-0.0447877	-0.114511	-0.143706	-0.030042	-0.0174961
Vitamin B1 metabolism	-0.0495895	-0.0773311	0.0250269	0.0746104	-0.113089	-0.0999572	0.0888983	0.139159	0.0102195	-0.155065	-0.181377	0.0979682	0.0606155	-0.0300084	0.0715313	-0.113515	0.0930958	0.0497596	0.0270608	0.041464	-0.00979414	-0.0059348	-0.0925174	-0.100876	-0.313645	-0.0166707	-0.0893637	-0.0114295	-0.144675	-0.0503333	0.341462	-0.0125949	-0.0704022	0.0361122	-0.0806927	0.0234723	-0.00620207	0.0352239	0.122539	0.0982945	0.00747079	0.149415	0.235045	-0.0859561	0.101895	-0.0460449	0.107075	-0.0711057	0.121094
Vitamin B12 metabolism	-0.126838	0.0461313	0.00800131	0.117203	0.00514713	0.0241471	-0.0413939	-0.0551814	-0.0427625	0.0297921	-0.0762787	-0.0537133	0.0217562	-0.0891183	-0.0141408	0.116958	-0.0719708	-0.0752041	0.0925411	0.00855576	0.0935512	-0.0448623	-0.0243183	0.111873	0.0779538	0.0817228	0.00950394	-0.0808017	0.0896616	-0.0231272	-0.0190302	-0.0742249	0.0795625	-0.0112549	-0.0146509	0.0323768	-0.00990266	-0.0692289	-0.201402	-0.0706567	-0.0887224	-0.0964913	0.0500574	-0.13458	-0.0230563	0.0573645	-0.0237163	0.102327	-0.00880863
Vitamin B2 metabolism	-0.108506	-0.054442	-0.0511252	0.0530162	0.0875904	-0.019302	0.0944416	0.0566019	-0.10083	-0.00705652	-0.146238	-0.00874174	-0.0257468	-0.0154017	0.00439488	0.0978733	0.153358	-0.0350325	0.129282	-0.0495242	-0.023597	-0.213585	0.0365812	-0.0253609	0.00776286	-0.145623	-0.106918	-0.078631	-0.0799096	-0.0361446	0.00587079	0.0829284	-0.225802	-0.0384714	-0.030416	-0.0832146	-0.151621	0.113531	-0.0357525	-0.0846746	-0.0244851	-0.0856435	0.0478715	0.0623659	0.109337	-0.106816	0.127347	0.228642	-0.223019
Vitamin B6 metabolism	-0.025158	0.0577271	-0.0282045	0.153046	0.138792	0.0959054	0.0736409	0.016121	0.151088	0.000795422	-0.062579	0.0486079	-0.0408369	0.0921999	-0.0108368	-0.130009	-0.0981847	0.150009	-0.136842	-0.0123215	-0.177036	-0.249388	-0.159798	-0.191579	0.0249482	-0.0718917	0.229362	-0.172889	0.0659366	0.0763664	-0.0170157	-0.0117209	0.0638142	-0.014422	0.0347979	-0.0220969	-0.0753578	0.0766907	0.0464628	0.0445321	0.120192	0.137338	-0.256154	0.0515281	-0.064719	-0.198205	0.0474077	0.065477	-0.00756754
Vitamin C metabolism	-0.0159293	-0.0743436	0.0546894	0.0931604	-0.0483404	-0.0721709	-0.0917568	0.283144	0.0307389	-0.0584457	0.0618899	0.0468437	0.0542225	0.0218127	0.152901	0.0976223	-0.0984145	0.0493916	0.188759	-0.122413	-0.0624663	-0.101845	-0.0767121	-0.0527321	0.0779939	0.10042	0.0280055	-0.0792355	-0.139012	-0.151818	-0.0784987	-0.0863784	-0.115772	-0.104163	-0.00401691	-0.208501	0.239361	-0.257565	0.00897431	0.0136435	-0.0685565	-0.123889	0.0206129	0.046787	0.0165592	-0.0444476	0.0679001	0.0512131	-0.0830112
Vitamin D metabolism	-0.018539	0.0123246	-0.0440682	0.000856929	-0.141755	0.00825418	-0.199778	0.272178	-0.0215331	-0.221785	0.0555434	-0.025119	0.122037	0.0643858	0.0947388	-0.0826448	-0.101587	-0.0245193	-0.0464451	-0.066913	0.0999993	-0.00343151	0.0868967	-0.0195524	0.030691	-0.0300472	0.0634846	0.0436809	0.0277681	-0.0743961	-0.0608292	0.0826374	0.108222	-0.0243397	-0.00927864	-0.0332017	-0.0802089	0.078165	0.0219305	-0.00729377	-0.0112434	0.0651521	0.0917227	-0.0197745	0.0470774	-0.0392006	-0.0919691	0.0992748	0.0348575
Vitamin metabolism	0.0434345	0.0524279	-0.0321826	0.214749	0.0508921	-0.0702049	-0.00652839	0.0900137	-0.0425214	-0.0317614	0.0830366	0.0333598	0.0446527	0.0454594	0.1715	-0.105181	0.0617422	-0.103805	0.115495	-0.0779126	-0.0411115	0.113128	-0.0616432	-0.226303	0.136942	0.0505556	-0.211992	0.13629	0.0626021	0.0562352	0.0291777	0.0094386	-0.132241	-0.126225	-0.0644877	0.110387	0.00011034	-0.0223352	-0.0627003	0.0417021	0.0348819	0.045225	-0.0711789	0.0191957	-0.0638107	-0.0361199	0.0174636	0.0225086	-0.0573066
Xenobiotic metabolism	-0.0131492	0.130736	-0.110678	0.11816	-0.0545857	-0.0133667	0.00111591	0.0816804	0.0193344	0.111609	0.0347165	0.0188359	0.00140955	0.0737487	0.0227905	0.0750999	0.0215183	0.0337788	0.0735451	0.0979146	-0.0391327	0.140598	-0.0672782	0.036881	0.0876499	-0.0778772	-0.0571153	-0.00993723	-0.0919696	0.0587608	-0.134604	0.0760513	-0.0138592	0.0454846	0.015678	-0.0250935	-0.101866	0.0614235	0.0309172	-0.0477576	0.00416798	0.0933254	0.0377505	-0.0414979	0.0912808	0.0556934	-0.0818197	-0.0511363	0.110381
[truncated: 47 more columns]
